# Supplementary material for: Transcription-coupled donor DNA expression increases homologous recombination for efficient genome editing
Source: PubMed Central journal article supplement — Nucleic Acids Res. 2022 Aug 5;50(19):e109. doi: 10.1093/nar/gkac676 (PMC9638910; doi:10.1093/nar/gkac676), 2022-08-05
Supplement: gkac676_supplemental_file.pdf [file gkac676_supplemental_file.pdf]

## **SUPPLEMENTARY DATA**

### **Transcription-coupled Donor DNA Expression Increases Homologous Recombination for Efficient Genome Editing**

Supplementary Figure S1 to S12

Supplementary Tables S1 to S4

## Supplementary Figures

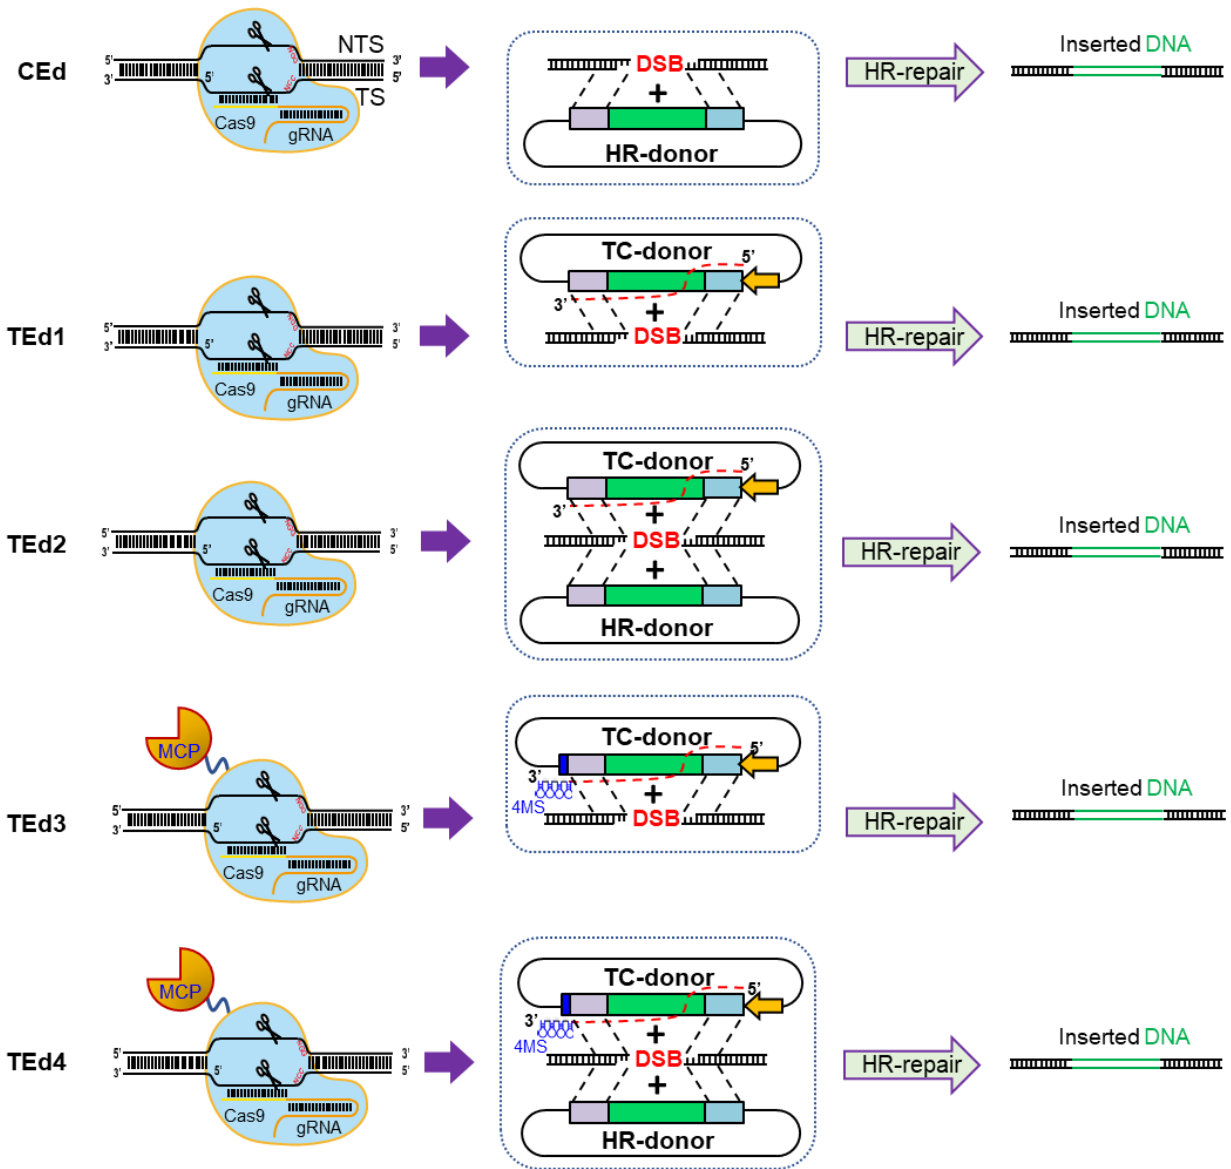

### Supplementary Figure S1. Development of TEed methods.

Gene KI by CEd is mediated by a plasmid donor template (HR-donor) while TEed is mediated by a TC-donor (TEd1). In TEd2, TC-donor and HR-donor are used together. TEd3/4 additionally employ the MCP-MS2 system, in which the MCP protein is fused to Cas9, and the 4xMS2 sequence is fused to the 3' tail of TC-RNA.

**A**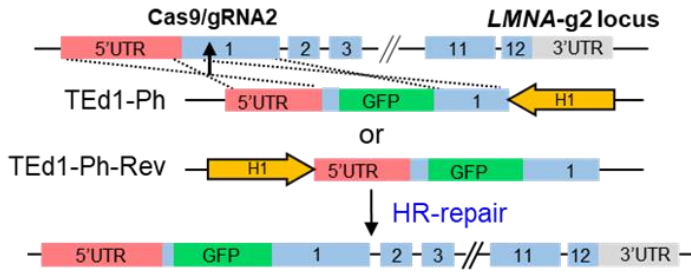**B**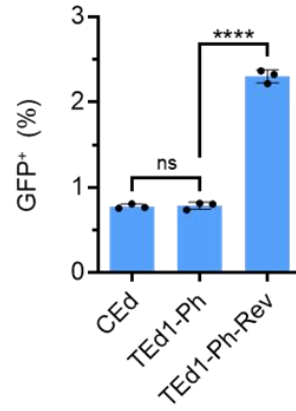**C**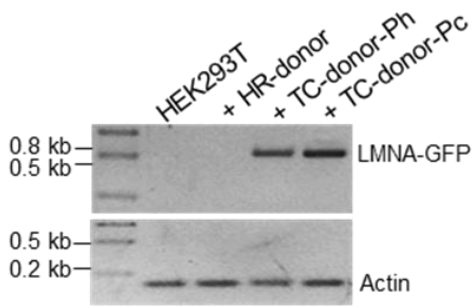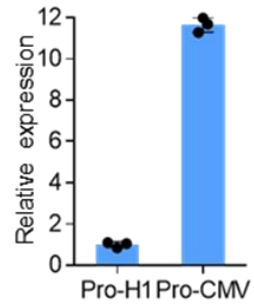**D**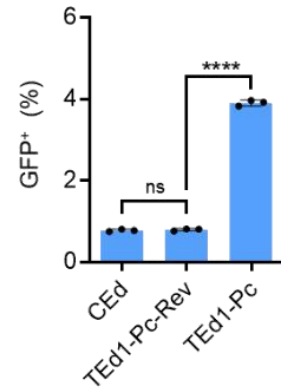**E**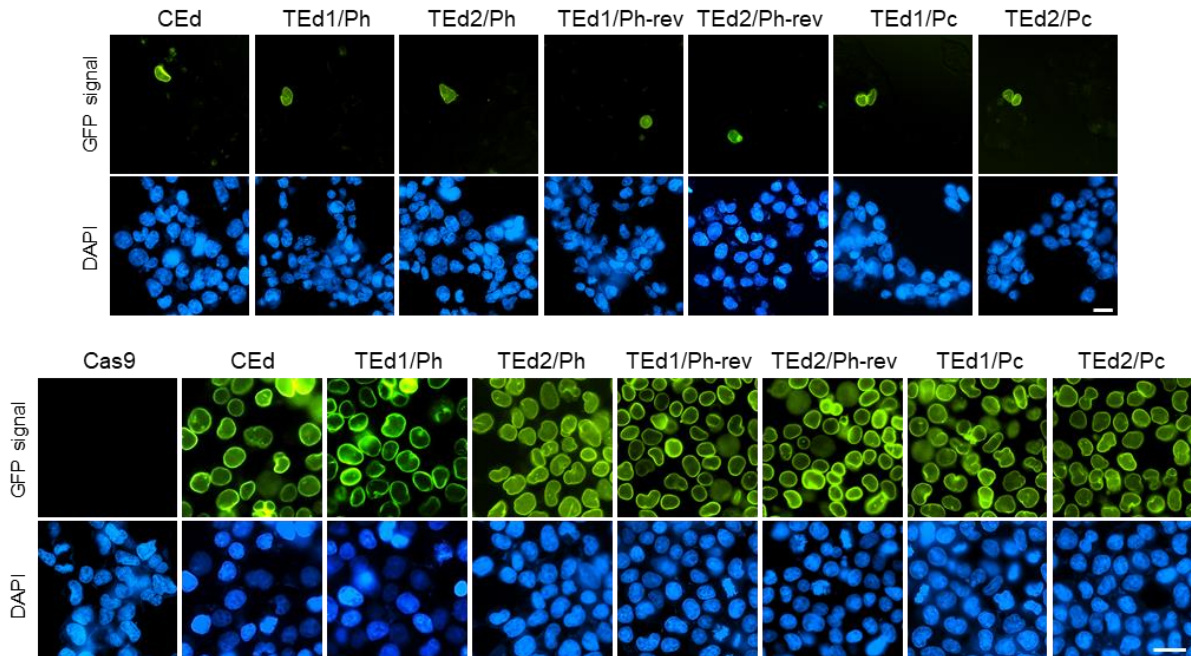

F

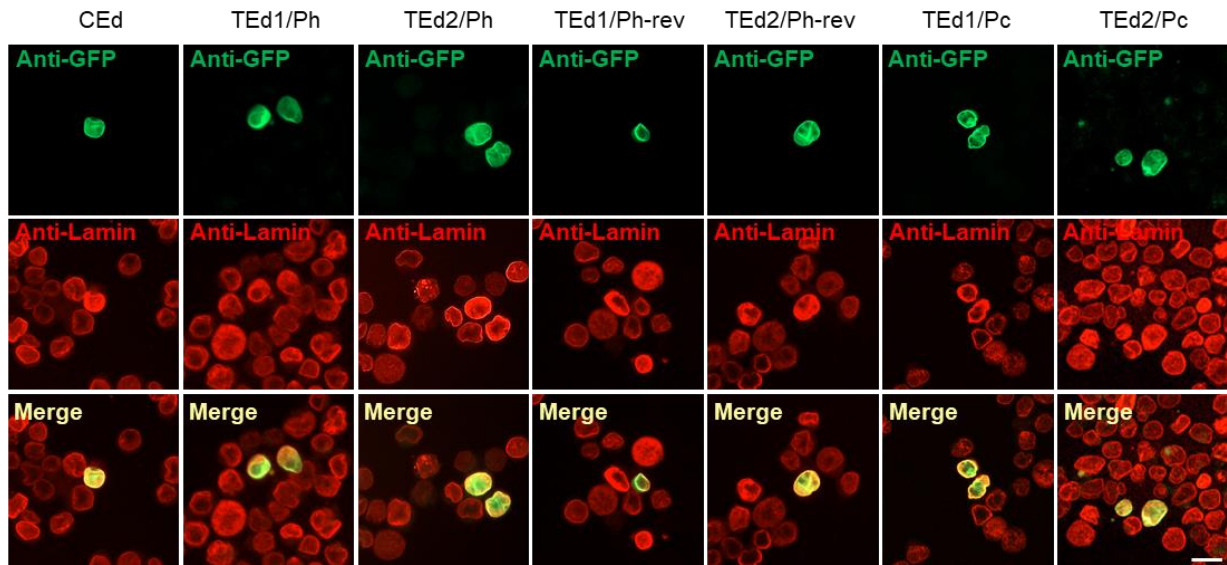

**Supplementary Figure S2. Optimization of the promoter and transcriptional direction in the TED-mediated knock-in strategy. (A)**, Components of the TED1 systems using original TC-donors at the *LMNA*-gRNA2 locus. **(B)**, GFP-KI efficiencies at the *LMNA*-gRNA2 locus in HEK293T cells using CEEd, TEd1-Ph, and TEd1-Ph-Rev. **(C)**, Left, gel image showing TC-donor transcripts. Right, a histogram showing the relative expression of homologous TC-RNAs driven by H1 and CMV promoters (calculated by qRT-PCR). *GAPDH* served as the internal reference. **(D)**, GFP-KI efficiencies evaluated by FACS in HEK293T cells using CEEd, TEd1-Pc, and TEd1-Pc-Rev at the *LMNA*-gRNA1 locus. **(E)**, Living imaging verification of GFP inserted into the *LMNA* locus by CEEd and TEd in HEK293T cells before (upper) and after sorting (below). Scale bar, 50  $\mu$ m. **(F)**, Immunofluorescence imaging verification of GFP colocalization with *LMNA* for CEEd and TEd. Scale bar, 50  $\mu$ m. Data are shown as individual data points and mean  $\pm$  s.d. for n=3 independent biological replicates. *P* values were obtained using the two-tailed Student's t-test. \*\*\*\**P* < 0.0001.

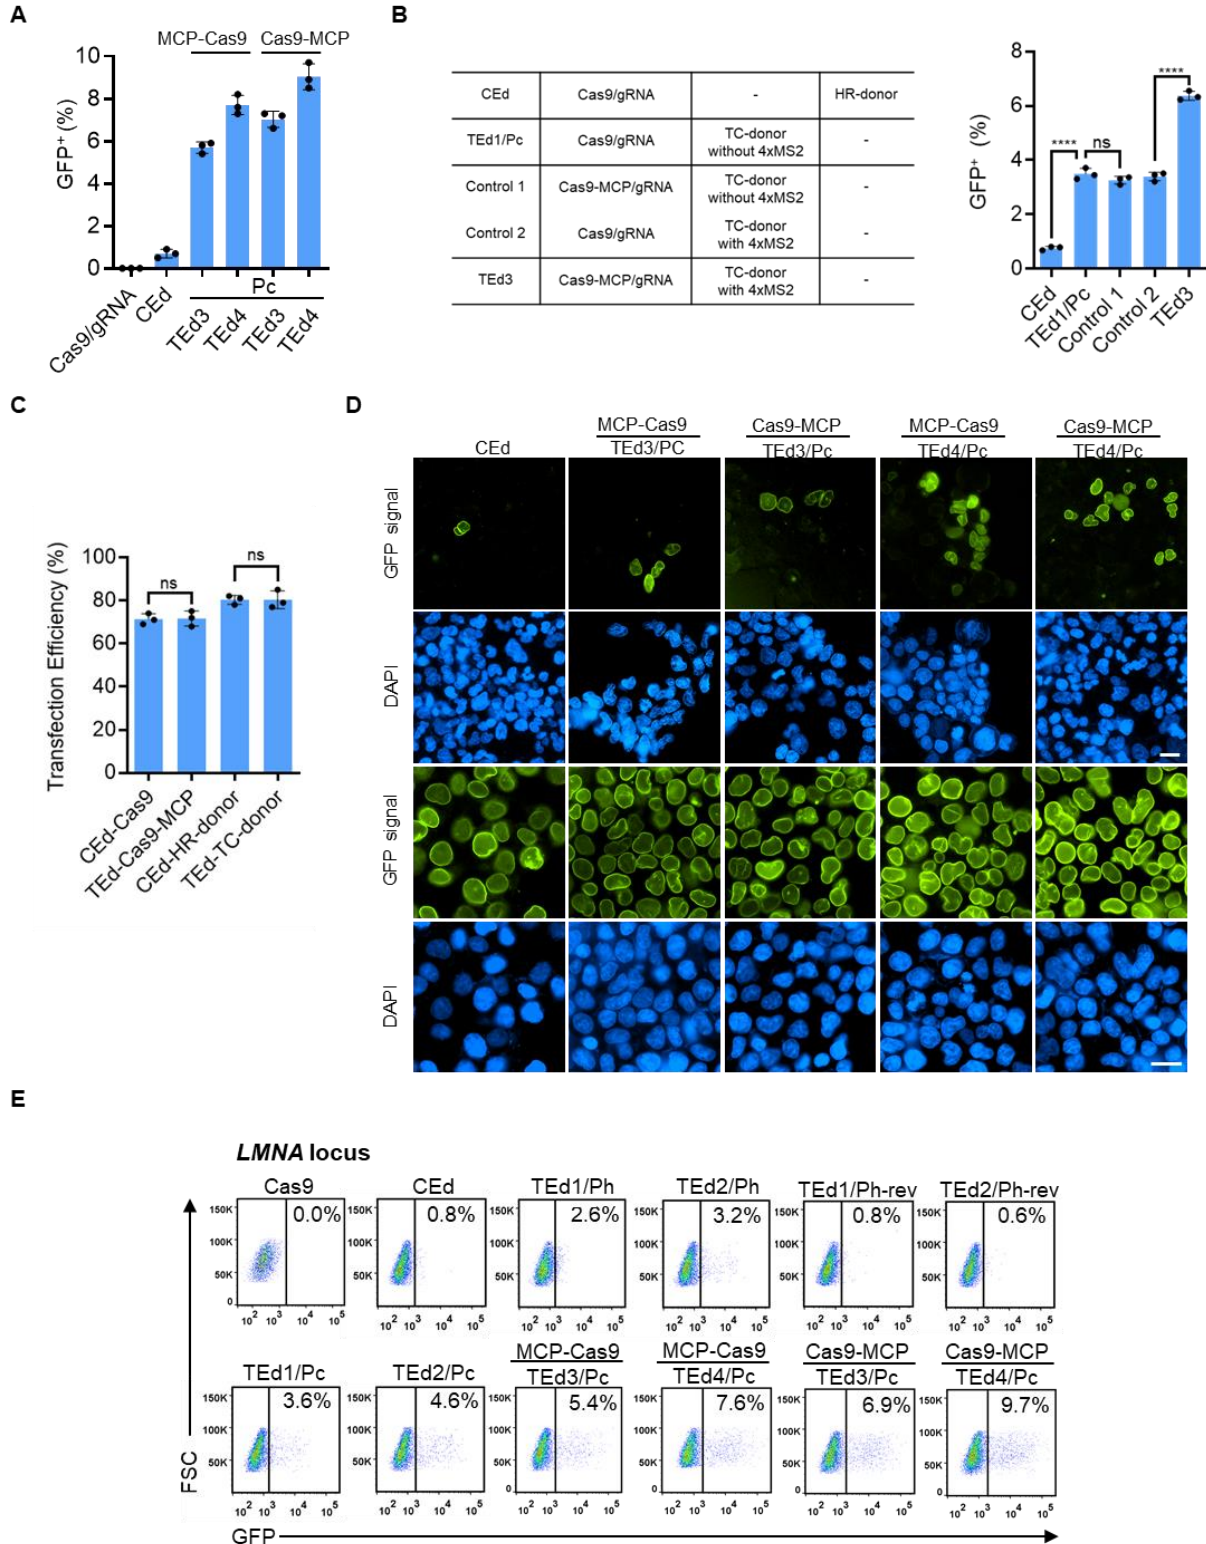

**Supplementary Figure S3. Tethering TC-RNAs to DSBs by the MCP-MS system improves TEd-mediated GFP-KI.**

(A), A graph showing the percentage of GFP+ cells obtained after TEd3 and TEd4, in which MCP is fused to the N- or C-terminal of Cas9. (B), Left, Components of CEEd, TEd1/3, and the two controls systems; Right,

GFP-KI efficiencies at the LMNA locus in HEK293T-cells for CEd and different TEd designs. (C), Transfection efficiencies of different plasmids used in CEd and TEd at the LMNA locus in HEK293T cells. (D), Imaging verification of GFP knock-in events at the LMNA locus for CEd and TEd (a) before sorting (left) and after sorting (right) in (A). Scale bar, 50  $\mu$ m. (E), Representative FACS analysis of GFP expression in cells edited by CEd and TEd. Data are shown as individual data points and mean  $\pm$  s.d. for n=3 independent biological replicates. P values were obtained using the two-tailed Student's t-test. \*\*\*\*P < 0.0001.



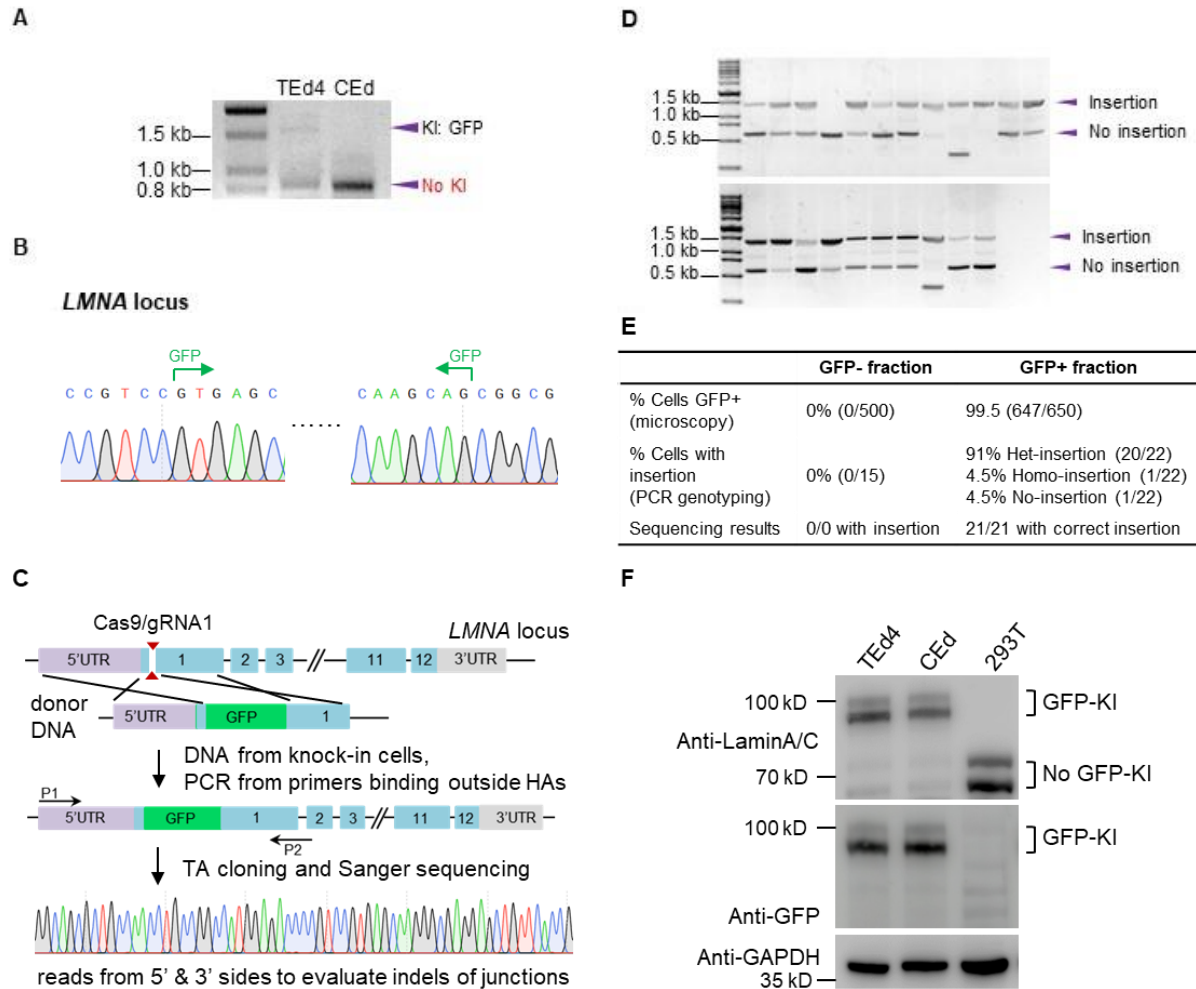

**Supplementary Figure S4. Molecular identification of TEd-mediated GFP KI at the *LMNA* locus.**

(A), Agarose gel showing representative PCR amplicons generated by specific primers outside the homology arms at the *LMNA* locus (P1 and P2 in Figure 1C). The KI products bands for CEEd and TEd4 are marked with an arrow and the lower bands are marked as “No KI” with an arrow. (B), Sanger sequencing results of junction PCR of GFP positive single clones sorted from TEd4-edited cells. (C), Design of the junction profiling assay employing genomic PCR with specific primers (P1 and P2) that bind outside the homology arms, followed by isolation of knock-in TA-clones. Paired Sanger sequencing of the TA-clones reveal indel edits at the 5'- and/or 3'- junctions. (D), Genotyping PCR of 22 GFP positive single clones after the sorting of TEd4-edited cells. Genomic DNA was amplified using primers P1 and P2. (E), Statistics of GFP+ and GFP- monoclonal heterozygote genotyping results for TEd4 cells. (F), Western blot analysis showing expression of Lamin-GFP fusion proteins in CEEd and TEd4 sorted cells. Upper bands of CEEd and TEd4 (upper panel) showing the expected GFP-lamin fusion sizes. GAPDH was used as a loading control.

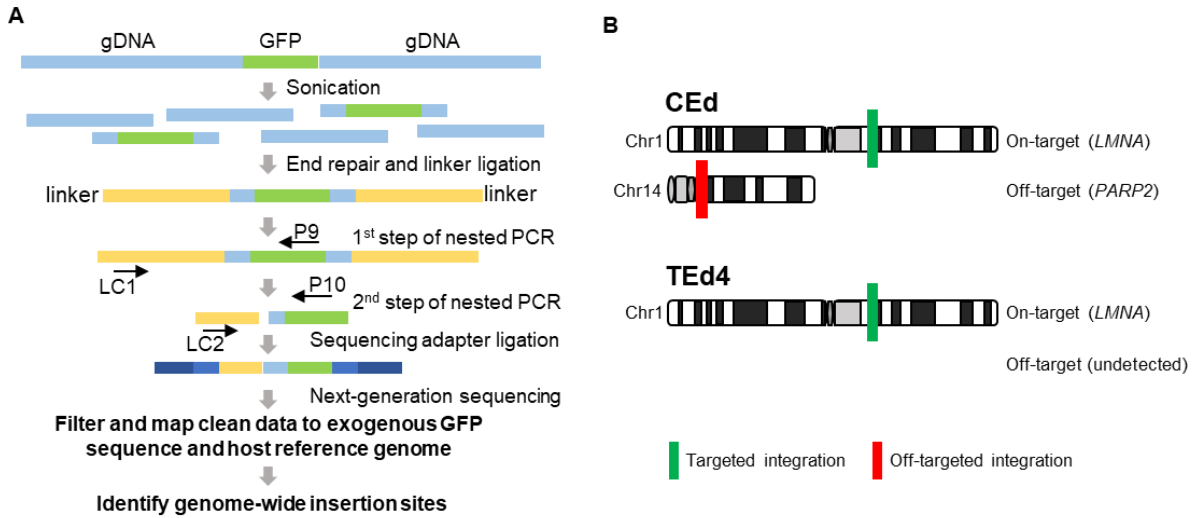

**Supplementary Figure S5. Summary of off-target KI sites in CEd and TEd.**

(A), Schematic presentation showing the design, procedures, and analysis steps for LM-PCR used to measure genome-wide KI sites of the GFP sequence. (B), Summary of the KI sites identified by LM-PCR, showing the expected on-target KI site and other identified off-target KI sites in CEd and TEd4. On-target KI at the LMNA locus is shown in green and off-target insertion is shown in red (Only insertion sites with more than three supporting reads are shown. Detailed sequence information is provided in Supplementary table S4).



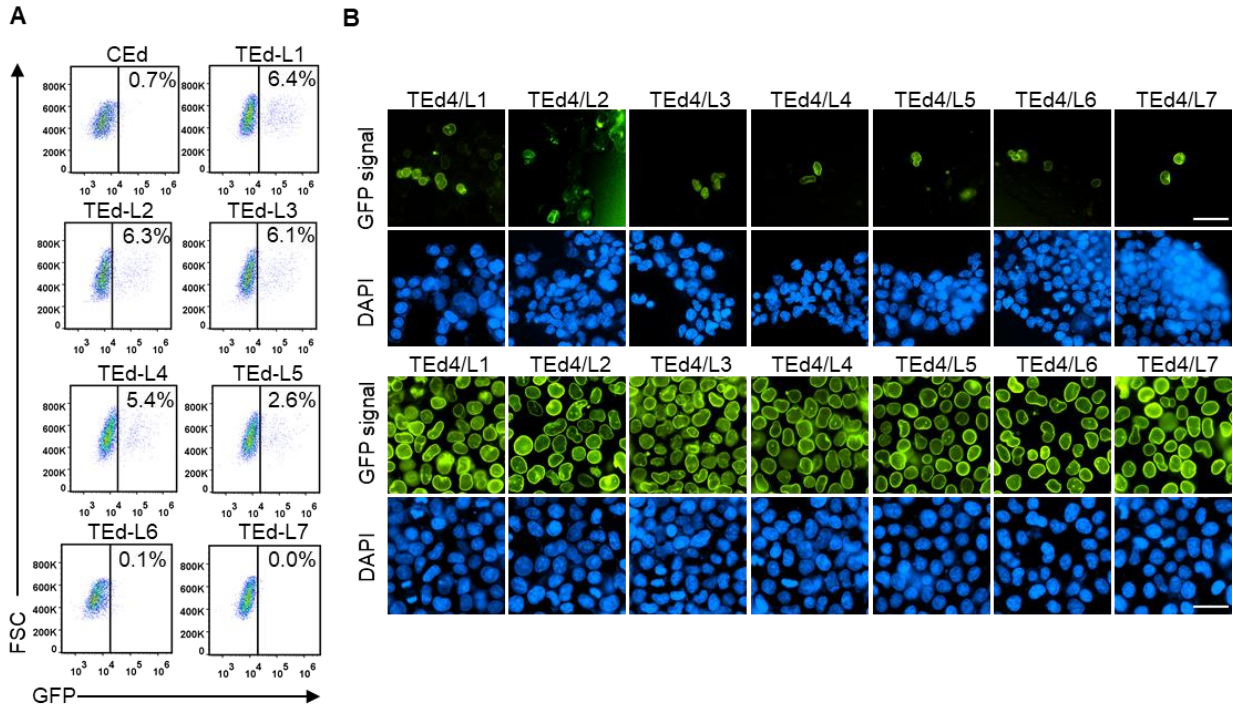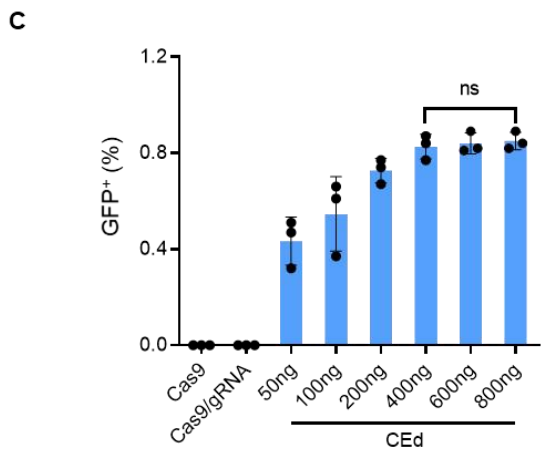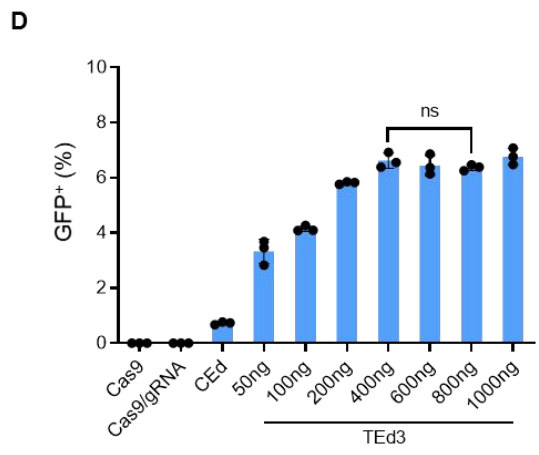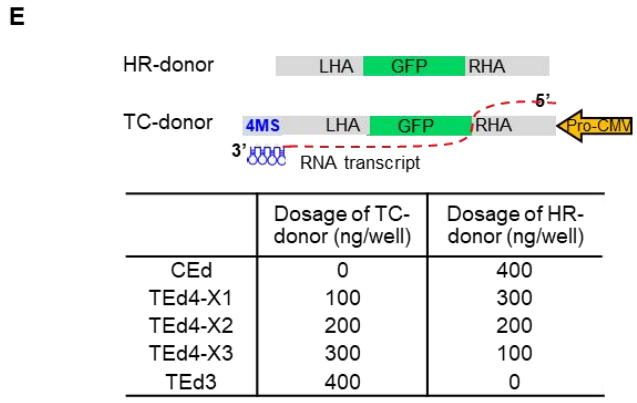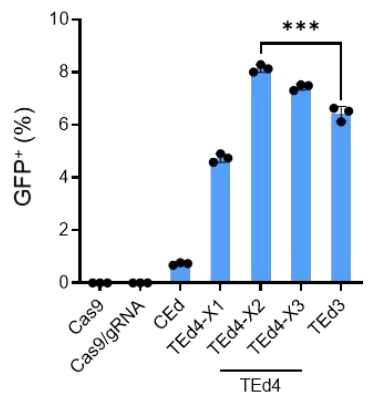

**Supplementary Figure S6. Optimization of homologous arm lengths and plasmid concentrations for the TEd-mediated knock-in strategy.**

(A), Representative FACS analysis of GFP expression in cells edited by TEd with different HA lengths or CEd 72h after transfection. (B), Living imaging verification of GFP KI at the LMNA locus in HEK293T cells edited by TEd with different HA lengths. Upper two rows show cells before sorting, and lower two rows show cells after sorting. Nuclei are stained with DAPI (blue). Scale bar, 50  $\mu$ m. (C) and (D), Plasmid concentration optimization of HR-donor in CEd (C) and TC-donor in TEd (D) at the LMNA locus in HEK293T cells. Graphs show the percentages of GFP+ cells obtained with different TC-donor plasmid concentrations 72 h after transfection. (E), Left, Donor plasmid concentration optimization for the TEd4 design. Right, Graphs showing percentage of GFP+ cells obtained at different donor plasmids concentrations 72 h after transfection. All data are shown as individual data points and mean  $\pm$  s.d for n=3 independent biological replicates. P values were obtained using the two-tailed Student's t-test. \*\*\*P < 0.001.

A

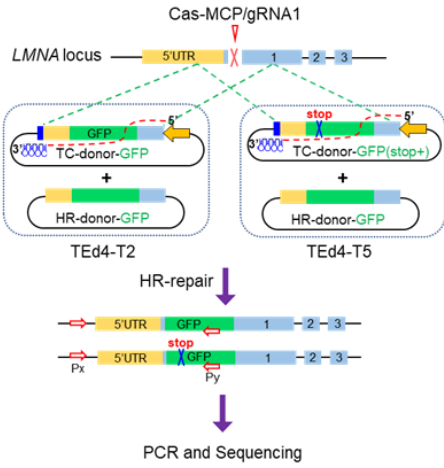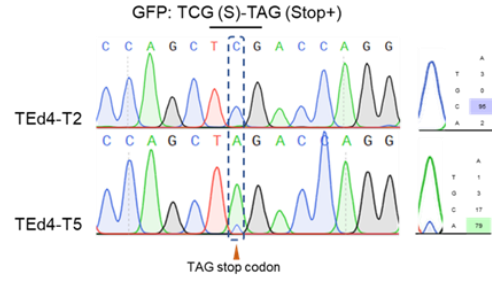

|         | KI proportion |              |
|---------|---------------|--------------|
|         | GFP %         | GFP(Stop+) % |
| TEd4-T2 | 100           | 0            |
| TEd4-T5 | 13            | 79           |

B

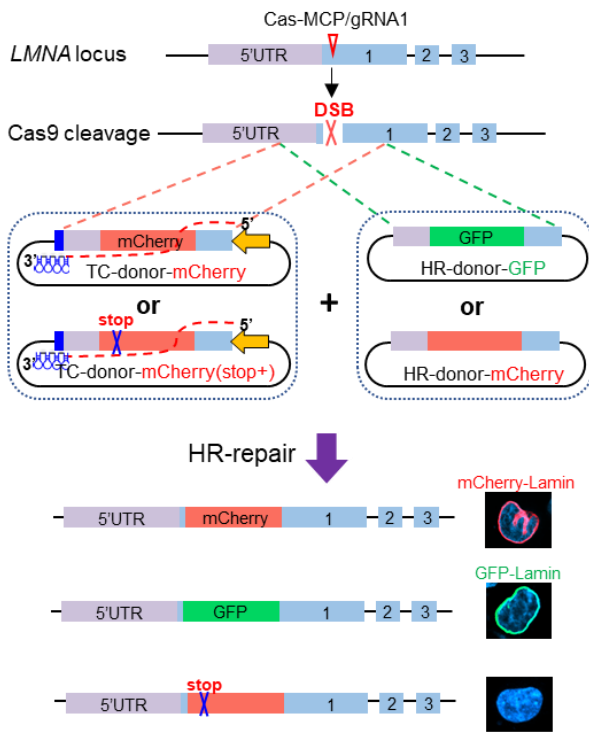

C

|     | TC-donor | HR-donor | Average KI efficiency |            |
|-----|----------|----------|-----------------------|------------|
|     |          |          | GFP (%)               | mCherry(%) |
| C11 | -        | +        | 0.0                   | 0.8        |
| C12 | -        | +        | 0.8                   | 0.0        |
| T11 | +        | +        | 0.0                   | 6.2        |
| T12 | +        | +        | 0.0                   | 9.0        |
| T13 | +        | +        | 0.4                   | 6.3        |
| T14 | +        | +        | 0.0                   | 0.0        |
| T15 | +        | +        | 0.0                   | 1.4        |
| T16 | +        | +        | 0.4                   | 0.0        |

D

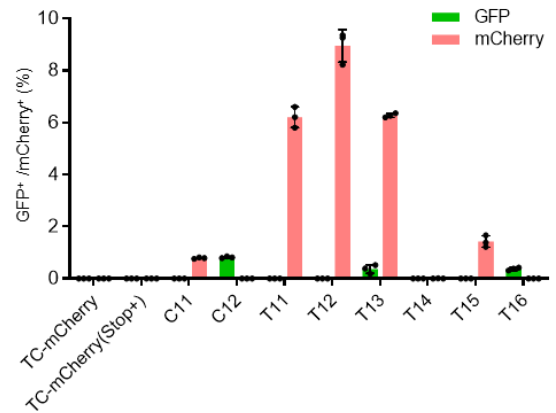

E

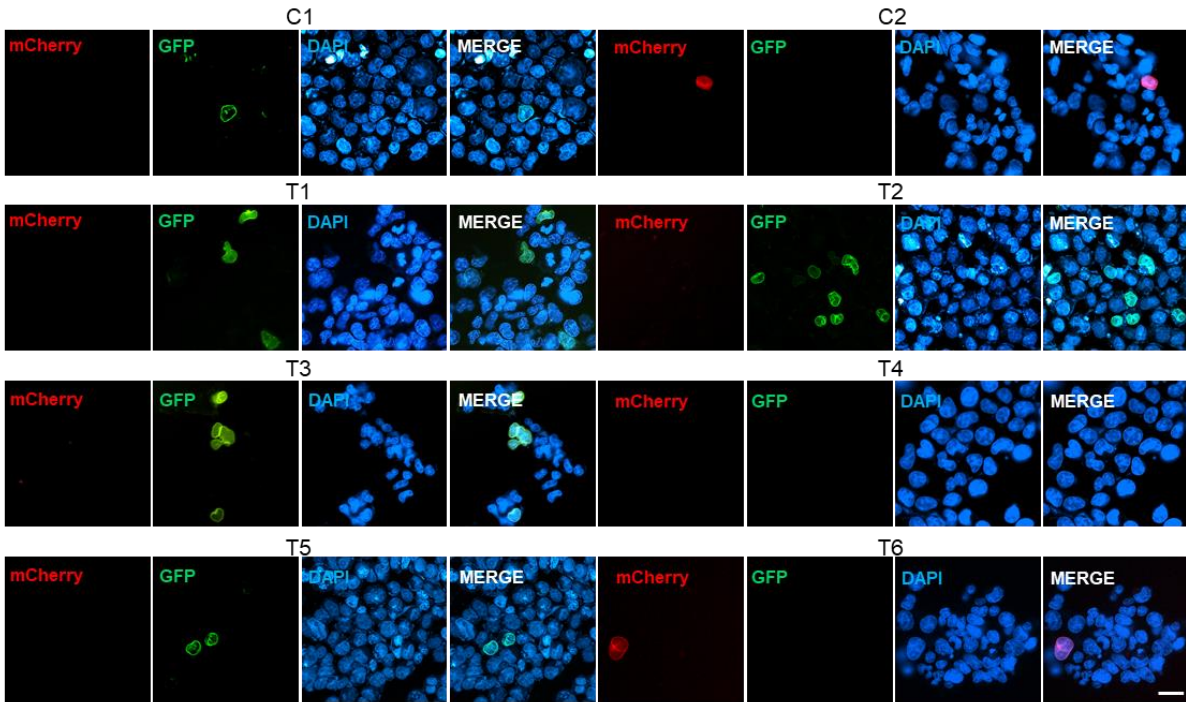

F

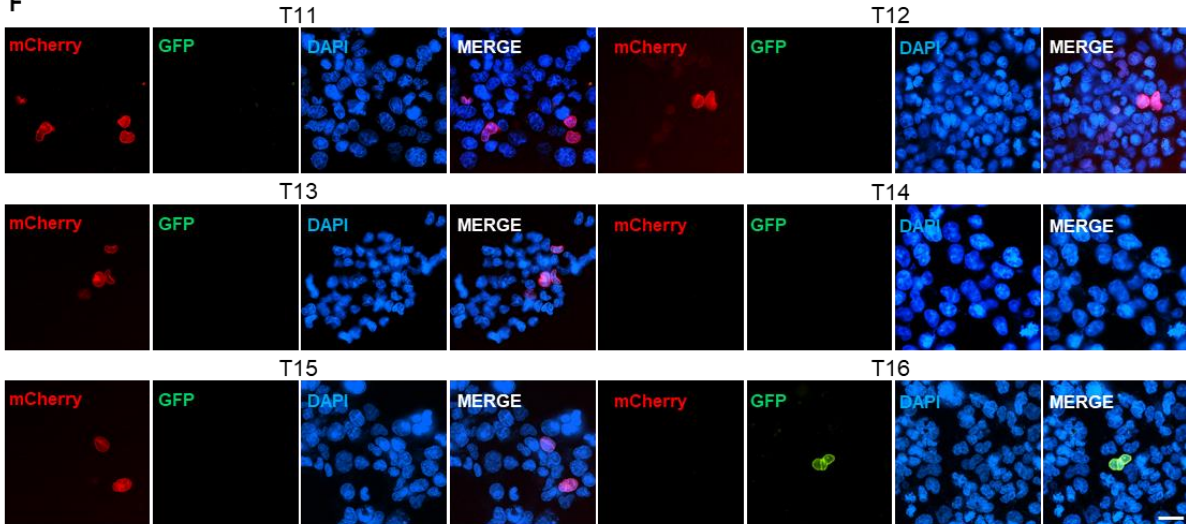

G

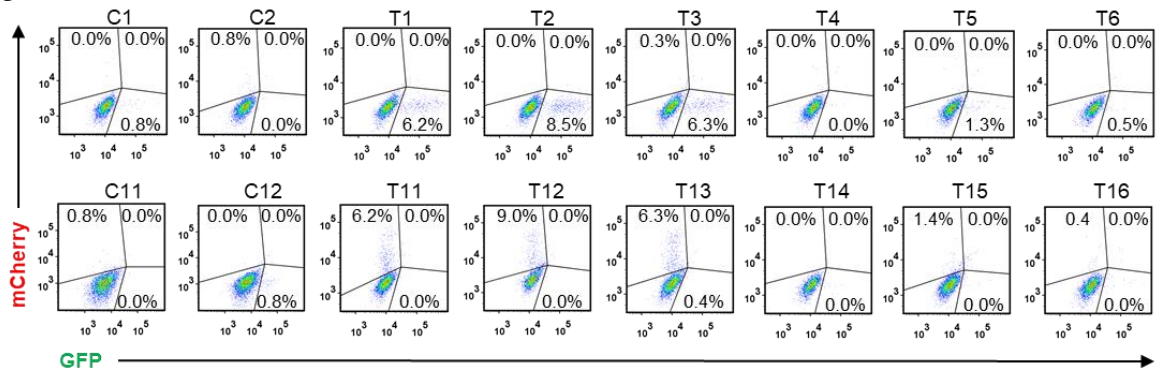

**Supplementary Figure S7. Transcription of the TC-donor facilitates gene editing.**

(A), Left, Schematics of TEd4-T2 and TEd4-T5 in Figure 2B showing HR-repair of a DSB at the LMNA locus with different TC-donors (GFP/GFP (Stop+)). Right upper, Sanger sequencing of genomic PCR products from HEK293T cells edited by the TEd4-T2 and TEd4-T5 designs in Figure 2B at the LMNA locus. The orange triangle indicates the mutated C-G to A-T base pairs of GFP. Right lower, Evaluation of GFP and GFP (Stop+) KI ratios in TEd4-T2 and TEd4-T5 by Sanger sequencing and TIDE online analysis. (B), Schematics showing HR-repair of a DSB at the LMNA locus with different GFP or mCherry donors. The HR-donor-GFP contains GFP edit (green) and HR-donor-mCherry contains mCherry edit (red). TC-donor-mCherry contains mCherry edit with no stop codon and TC-donor-mCherry-stop (+) contains mCherry edit with a stop codon (blue cross). (C), Summary of the GFP/mCherry KI efficiencies of CEd and TEd with different donors. (D), GFP/mCherry KI efficiencies of C11, C12, and T11~T16. Graphs showing the percentage of GFP+/mCherry+ cells (y-axis, as determined by FACS) for each donor combination (x-axis). The HR-donor alone and the corresponding TC-donor alone were used as controls. All data are shown as individual data points and mean  $\pm$  s.d for n=3 independent biological replicates. (E, F), Imaging verification of GFP or mCherry inserted at the LMNA site in HEK293T living cells edited by CEd or TEd designs with different HA lengths before (upper) and after sorting (lower) in Fig.2B and Supplementary Fig.7B. Scale bar, 50  $\mu$ m. (G), Representative FACS analysis of GFP or mCherry expression in HEK293T cells transfected with combinations of C1, C2, T1~T6, C11, C12, and T11~T16 listed in Figure 2B and Supplementary Figure S7B targeting the LMNA locus 72h after transfection.

**A**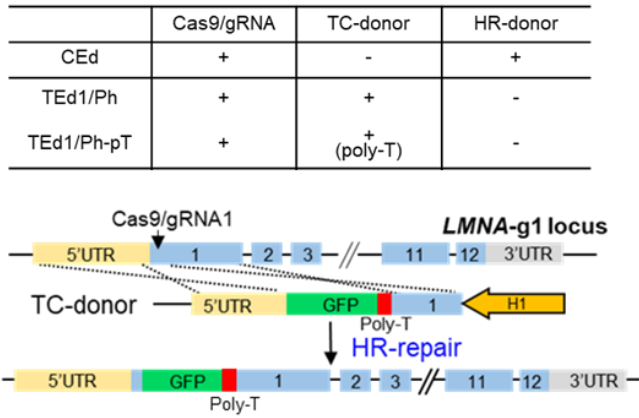**B**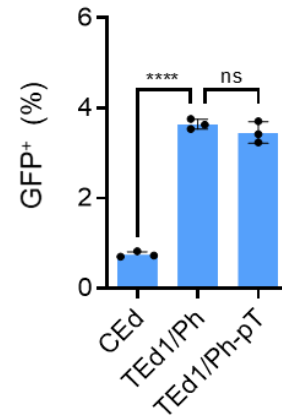**C**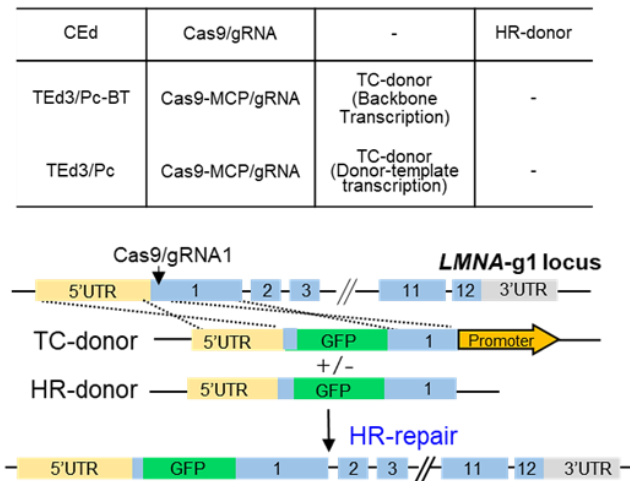**D**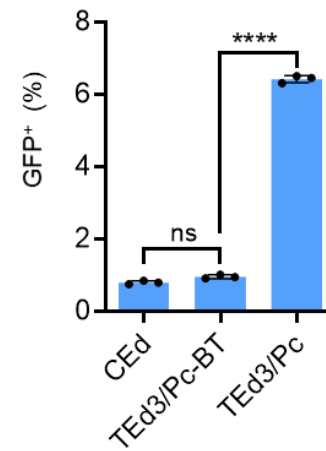**E**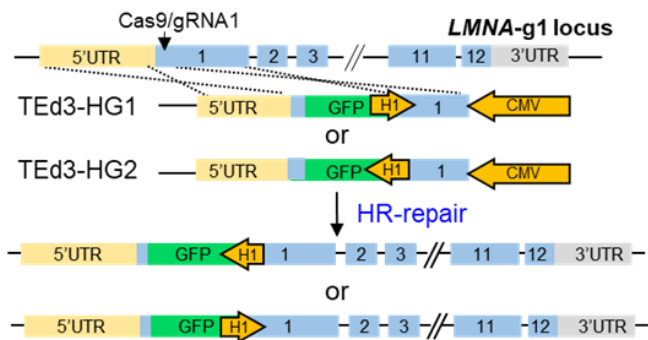**F**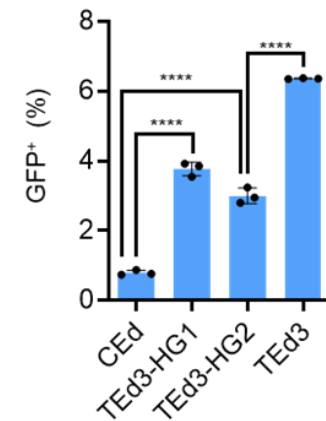

**Supplementary Figure S8. Other factors that may affect TEd-mediated GFP-KI efficiency.**

(A), Upper, Components of CE<sub>d</sub> and different TEd designs; lower, Schematic overview of the TEd1/Ph-pT with poly-T sequence mediated GFP-KI at the LMNA locus. A 9 bp sequence of thymine was inserted into the N-terminus of the GFP sequence, which would terminate transcription initiated from the H1 promoter. (B), GFP-KI efficiencies at the LMNA locus in HEK293T cells with CE<sub>d</sub> and the different TEd designs. (C), Upper, Components in the CE<sub>d</sub> and the two TEd3 systems; Lower, Schematic overview of TEd3/Pc-BT with a TC-donor, in which the CMV promoter initiates backbone-transcription (BT) to mediate GFP-KI at the LMNA locus. (D), GFP-KI efficiencies at the LMNA locus in HEK293T cells with CE<sub>d</sub> and different TEd designs. (E), Schematic overview of TEd3-mediated gene editing (TEd3-HG1/2, TC-donors with a functional H1 promoter at the 3' end of the GFP coding sequence). (F), GFP-KI efficiencies at the LMNA locus in HEK293T cells using CE<sub>d</sub> and different TEd3 designs. Data are shown as individual data points and mean  $\pm$  s.d. for n = 3 independent biological replicates. P values were obtained using the two-tailed Student's t-test. \*\*\*\*P < 0.0001.



**A**

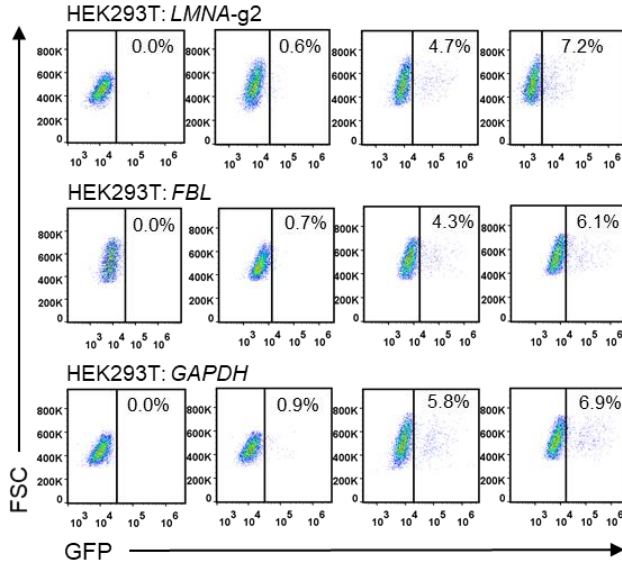

**B**

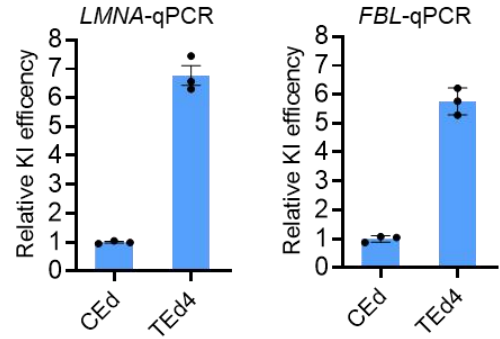

**C**

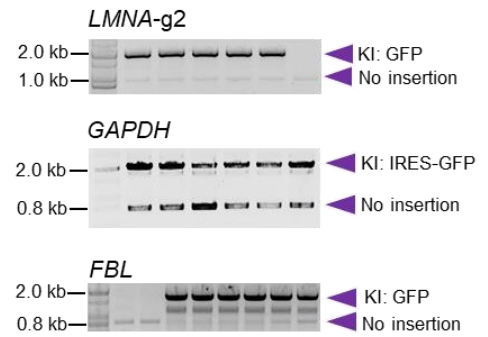

**D**

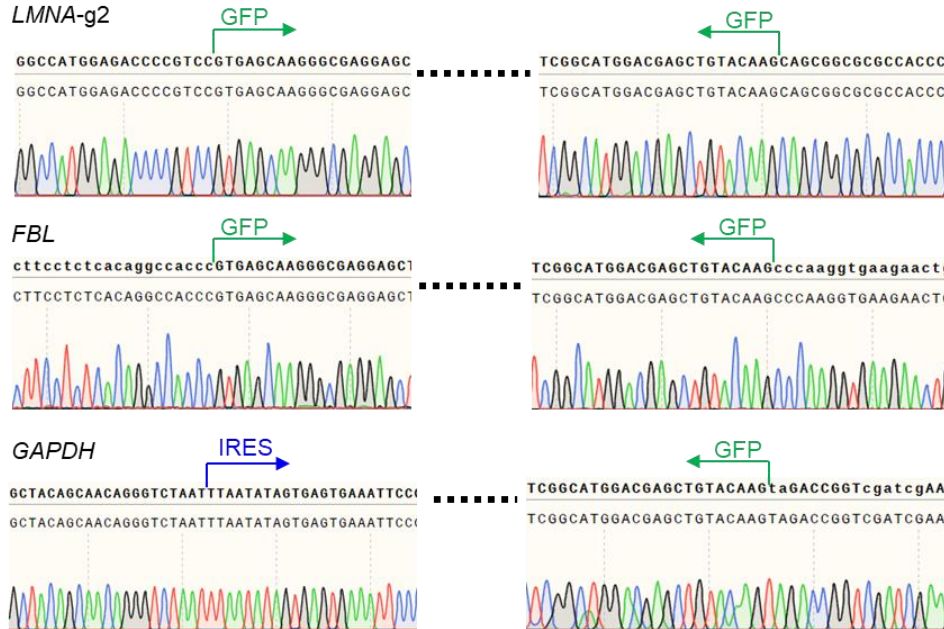

**E**HEK293T: *FBL* locus, GFP KI

Targeted integration

**CEd**Chr19  On-target (*FBL*)**TEd4**Chr19  On-target (*FBL*)

Off-target (undetected)

Off-target (undetected)

**F**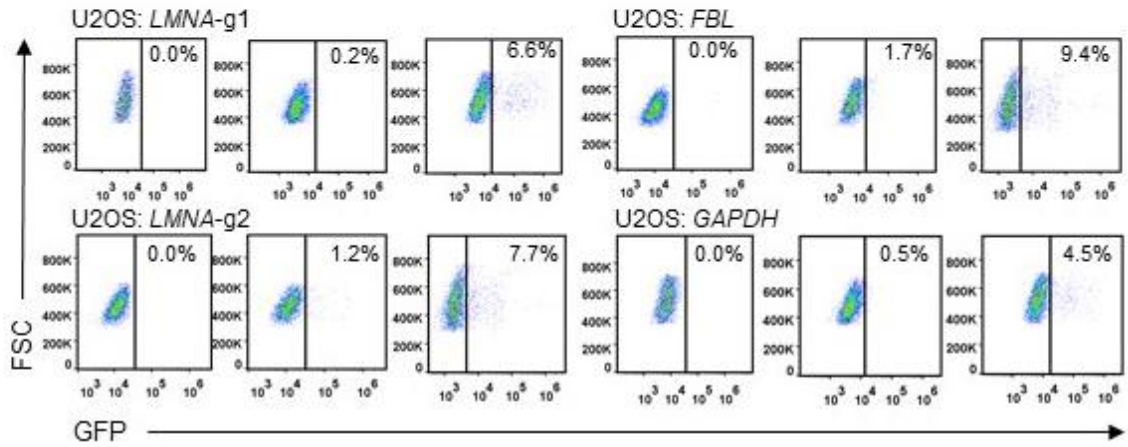**G**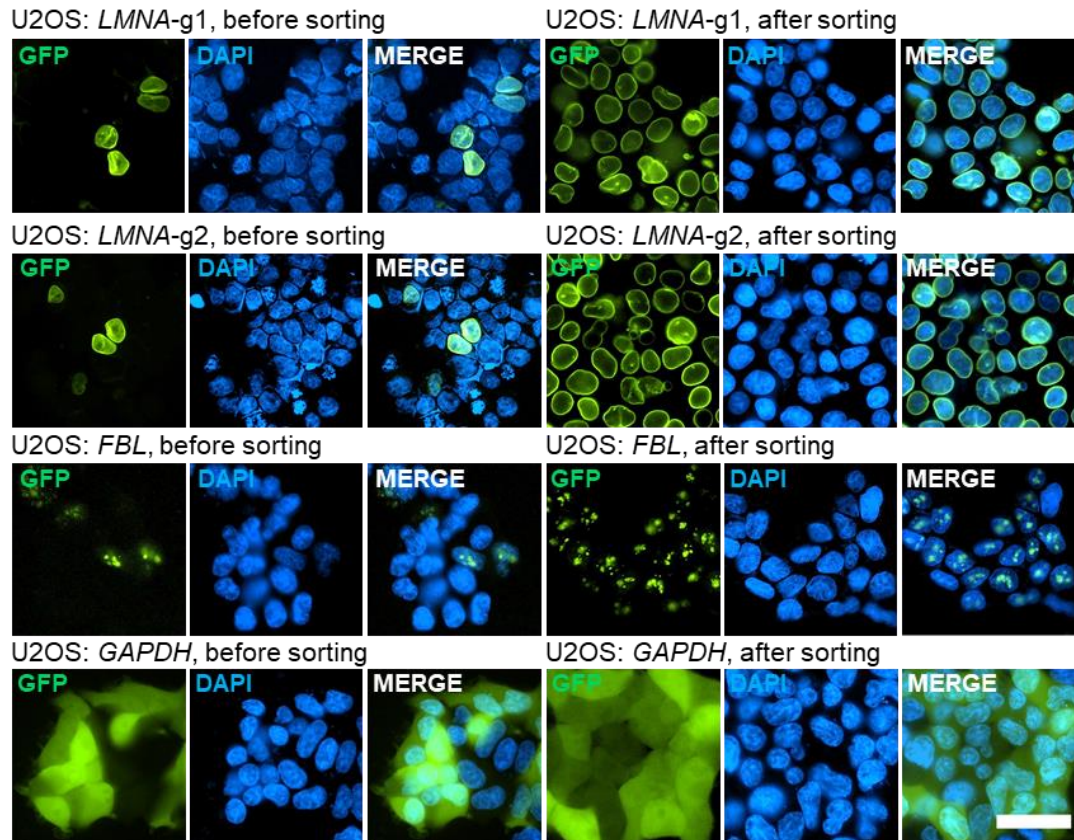

**Supplementary Figure S9. TEd editing at other gene loci in different cell types.**

(A), Representative FACS analysis of GFP expression 72h after transfection at three targeting loci in HEK293T cells. (B), qPCR analyses of the GFP KI level at the LMNA-g2 and FBL loci. ACTB was used as internal genomic reference. Data are shown as individual data points and mean  $\pm$  s.d for n=3 independent biological replicates. (C), PCR genotyping of several GFP positive single clones of each target locus in HEK293T cells after sorting of TEd4-edited cells, showing the heterozygosity of KI. Genomic DNA was amplified using primers outside HAs. HEK293T cells without transfection were used for controls. The GFP (or IRES-GFP) KI in each panel was of the expected size (upper bands). The lower bands of each panel show the expected sizes of endogenous genes. 293T cells were used as controls. (D), Sanger sequencing results of 5' and 3' junction PCR products of GFP positive single clones sorted after TEd4 at three target loci in HEK293T cells. (E), Summary of the KI sites identified by LM-PCR, showing the on-target and off-target sites in CEd and TEd4. On-target KI at the LMNA locus is shown in green (Only insertion sites with more than three supporting reads are shown. Detailed sequence information is provided in Supplementary table S4). (F), Representative FACS analysis of GFP expression at four target loci by CEd and TEd4 in U2OS cells 72h after transfection. (G), (Left) Fluorescence imaging verification of GFP inserted into different target sites in U2OS before sorting. (Right) Imaging verification of GFP inserted into different sites in U2OS cells after sorting. Scale bar, 50  $\mu$ m.

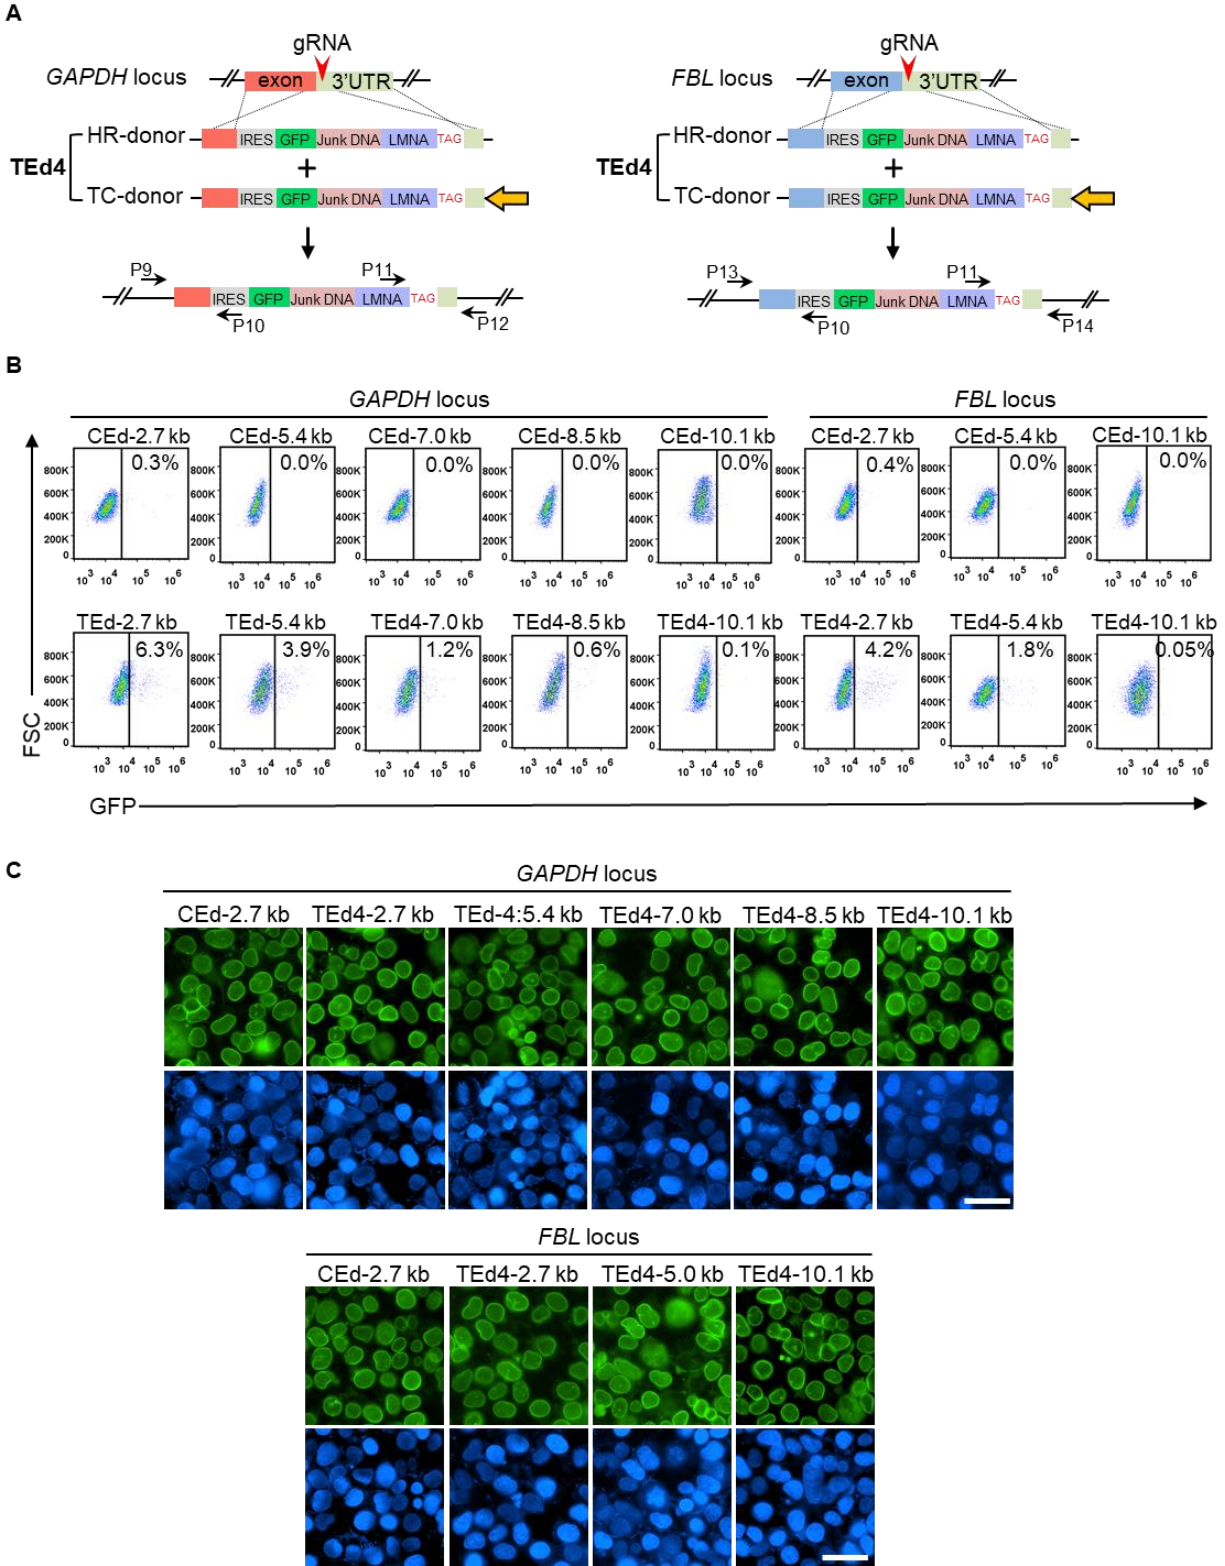



D

Junction sequencing at *GAPDH* locus

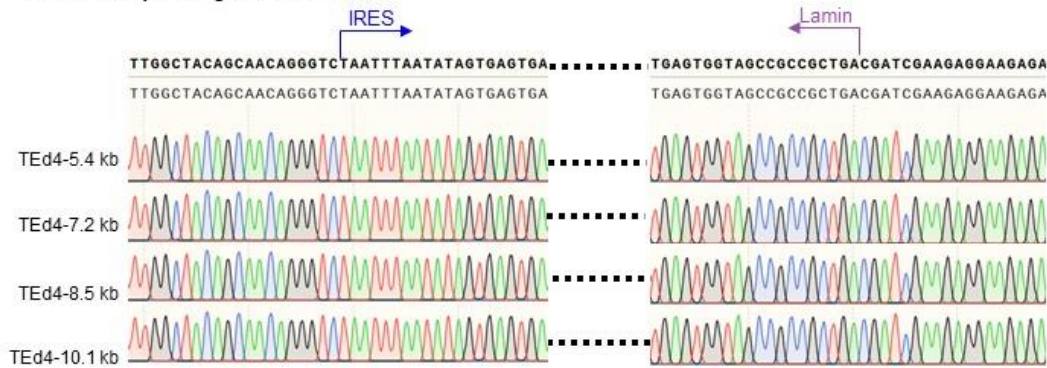

E

Junction sequencing at *FBL* locus

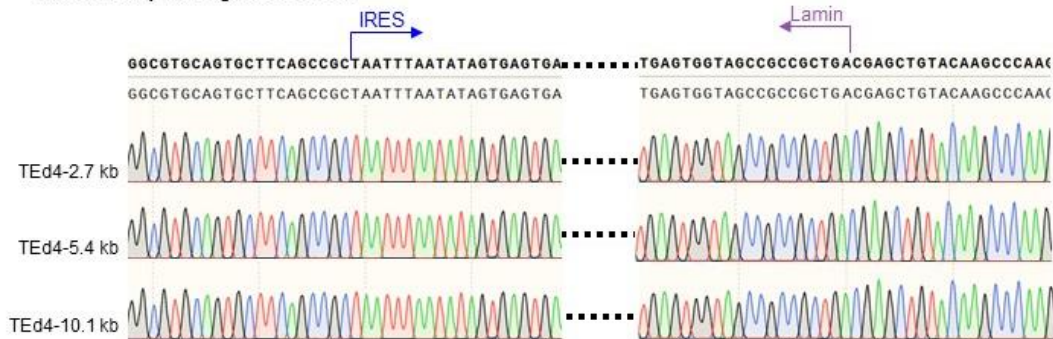

F

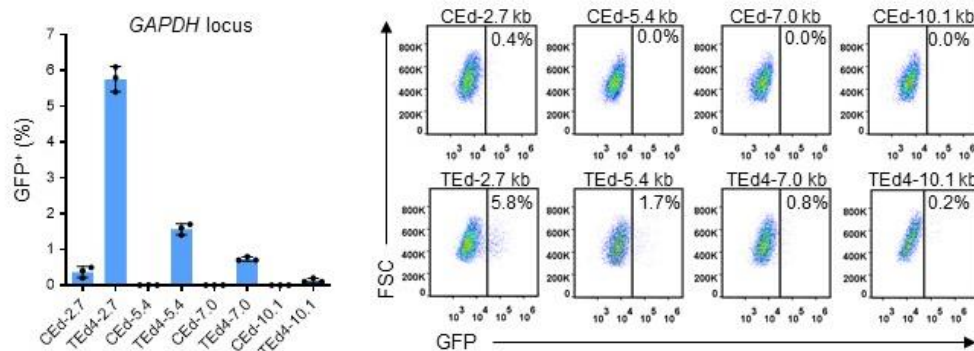

**Supplementary Figure S10. TEd mediates long fragment KI.**

(A), Schematic of large fragment KI at the *GAPDH* locus (left) and *FBL* locus (right) by TEd4. HR-donor and TC-donor were designed to carry 2.7~10 kb edits. Both gRNAs were targeted to the 3'-UTR of genes. Primers used to amplify the junctions are marked as P9~P14. (B), Representative FACS analysis of GFP expression in HEK293T cells transfected with KI fragments of different sizes targeting the *GAPDH* and *FBL* sites listed in Fig. 4A. (C), Living fluorescence imaging of KI with different segment lengths at the *GAPDH* locus (upper) and *FBL* locus (lower) in HEK293T cells after sorting. GFP: green, DAPI: blue. Scale bar, 50  $\mu$ m. (D), Sanger sequencing results of the junction PCR products at the *GAPDH* locus using the specific primers shown in (A) (P9 and P10 for the 5'-junction, P11 and P12 for the 3'-junction). The two pairs of primers were designed to bind the IRES-GFP sequence near the junction site and to the outside of the

homology arms. (E), Sanger sequencing results of the 5' and 3' junction PCR products at the FBL locus using the specific primers listed in (A) (P10 and P13 for 5'-junction, P11 and P14 for 3'-junction). The two pairs of primers were designed to bind to the IRES-GFP sequence near the junction site and to the outside of the homology arms. (F), Representative FACS analysis of GFP expression after KI of segments of different lengths at the GAPDH locus using TEd4 and CEd in U2OS cells. All data are shown as individual data points and mean  $\pm$  s.d for n=3 independent biological replicates.

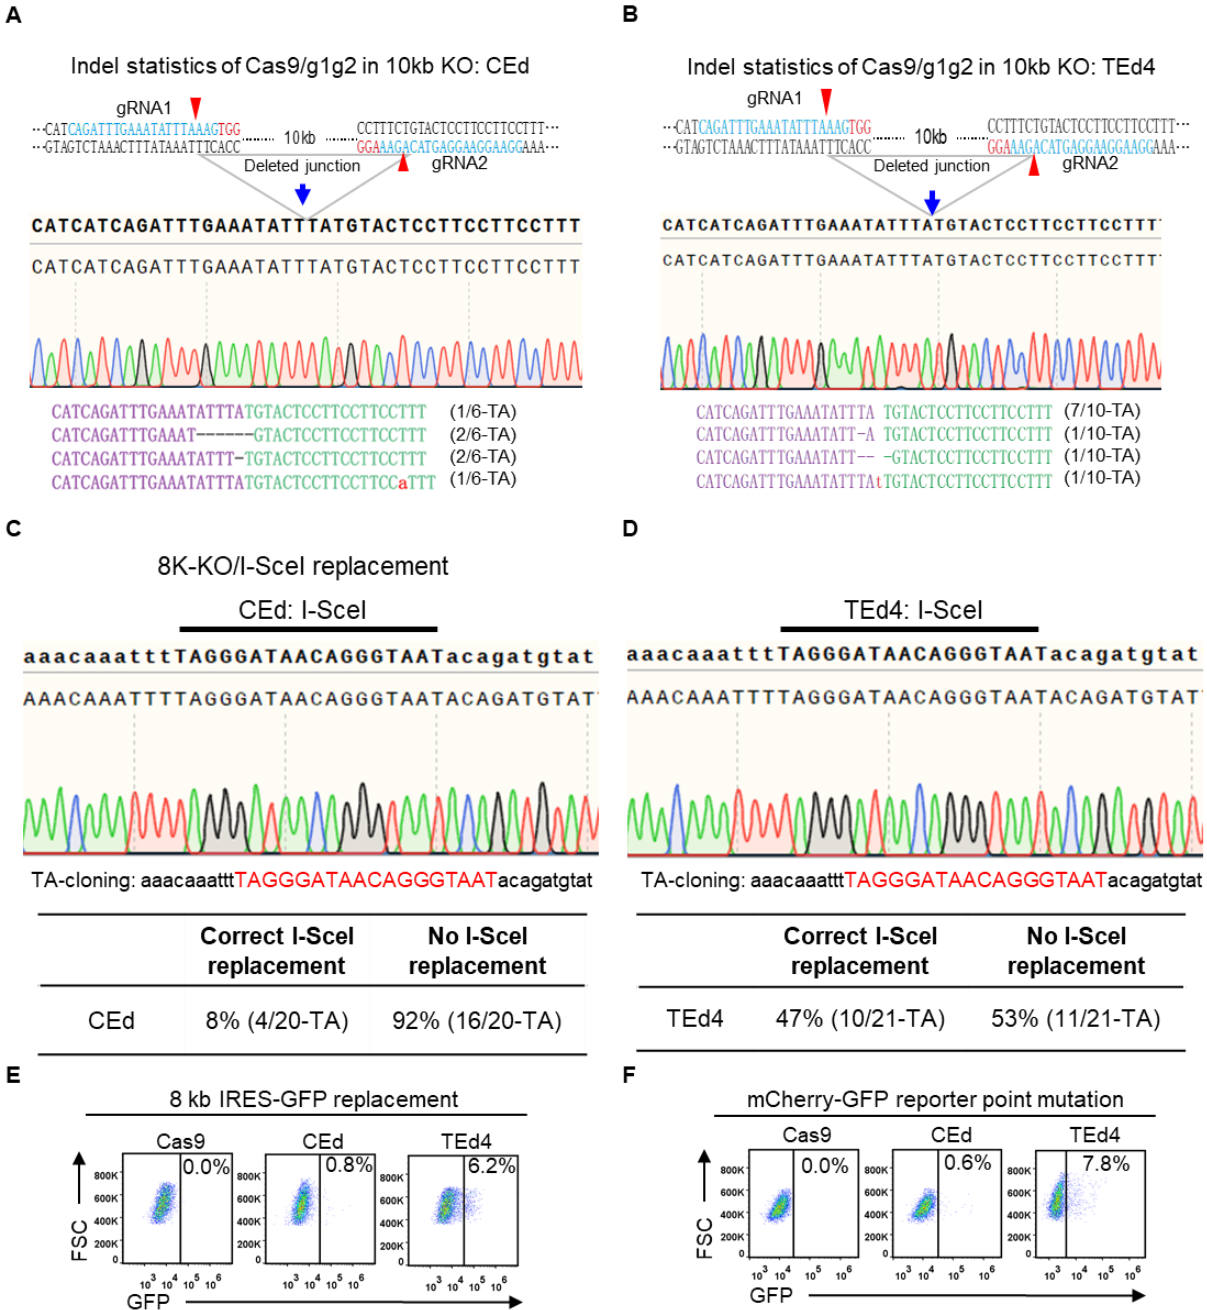

**Supplementary Figure S11. Molecular validation of genome deletion/replacement and point mutations.**

(A, B), Representative Sanger sequencing of TA-clones after 10 kb knockdown at the CDC42 locus in cells edited by CE<sub>d</sub> (A) and TE<sub>d</sub>4 (B). (C, D), Representative Sanger sequencing and statistics of I-SceI replacement TA-clones of genomic PCR at the CDC42 locus in cells edited by CE<sub>d</sub> (C) and TE<sub>d</sub>4 (D). (E), Representative FACS analysis of GFP expression in cells with replacement of IRES-GFP edited by CE<sub>d</sub> or TE<sub>d</sub> shown in Figure 5I. (F), Representative FACS analysis of GFP expression in mCherry-GFP reporter cells edited by CE<sub>d</sub> or TE<sub>d</sub> shown in Figure 6B.



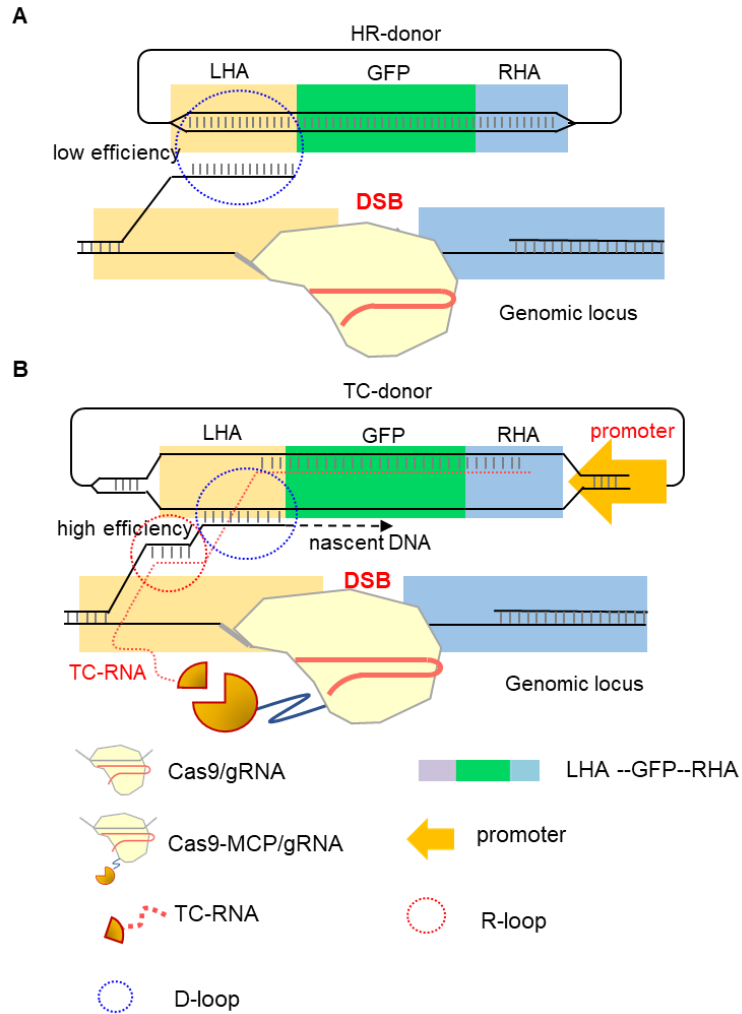

**Supplementary Figure S12. Model of the role of transcription-coupled DNA donor in the TED method.** (A), The role of the classic HR-donor in canonical genome editing. (B), The possible functional mechanisms of the TC-donor in TED. Transcription of the TC-donor may play a major role in improving the efficiency of TED by facilitating the invasion of the 3' ssDNA of the DSB into the displaced single-stranded homology arm. Additionally, the TC-donor transcript (TC-RNA) may form transient RNA-DNA hybrids near the DSB, thus making it accessible to the repair machinery. Cas9-MCP may also help recruit TC-RNA/donor complexes to the DSB site by binding specifically to the MS2 aptamer, thereby increasing the local concentration of TC-donor templates around DSBs and facilitating HR.

**Supplementary Table S1. The sequences of CRISPR/Cas9 target sites tested in this study. PAM sequences are underlined.**

| Target site                 | gRNA target site (5'-3')         |
|-----------------------------|----------------------------------|
| <i>LMNA gRNA1</i>           | CCATGGAGACCCCGTCCCAG <u>CGG</u>  |
| <i>LMNA gRNA2</i>           | GGGCGACAGCGGAGTGGAGCT <u>TGG</u> |
| <i>FBL</i>                  | CTCTCACAGGCCACCCCCA <u>AGG</u>   |
| <i>GAPDH</i>                | AGCCCCAGCAAGAGCACAAG <u>AGG</u>  |
| <i>CDC42 gRNA1</i>          | CAGATTTGAAATATTTAAAGT <u>TGG</u> |
| <i>CDC42 gRNA2</i>          | GGAAGGAAGGAGTACAGAA <u>AGG</u>   |
| <i>CDC42 gRNA3</i>          | CACAACAAACAAATTTCCAT <u>CGG</u>  |
| <i>CDC42 gRNA4</i>          | GACTAGAAATACATCTGTTT <u>TGG</u>  |
| <i>mCherry-GFP Reporter</i> | GCGCCTGCTCGCGATGCTAG <u>AGG</u>  |
| <i>PRNP</i>                 | GCAGTGGTGGGGGCCTTGG <u>CGG</u>   |

**Supplementary Table S2. Inserted sequences of donor plasmids used in this study. Restriction enzyme sites were underlined.**

|                                                                                                                                                                                                                                                                                                                                                                                                                                                                                                                                                                                                                                                                                                                                                                                                                                                                                                                                                                                                                                                                                                                                                                                                                                                                                                                                                                                                                                                                           |
|---------------------------------------------------------------------------------------------------------------------------------------------------------------------------------------------------------------------------------------------------------------------------------------------------------------------------------------------------------------------------------------------------------------------------------------------------------------------------------------------------------------------------------------------------------------------------------------------------------------------------------------------------------------------------------------------------------------------------------------------------------------------------------------------------------------------------------------------------------------------------------------------------------------------------------------------------------------------------------------------------------------------------------------------------------------------------------------------------------------------------------------------------------------------------------------------------------------------------------------------------------------------------------------------------------------------------------------------------------------------------------------------------------------------------------------------------------------------------|
| <p><b>EGFP HR-donor plasmid, lamin A/C, 240bp HAs</b></p> <p><u>GGTACCCCGGGCGTCCGGTACTCAGTGTTCGCGGGAGCGCCGCACCTACACCAGCCAACCCAGATCCCGAGGTCCGACAGCGCCCGGCCAGATCCCCACGCCTGCCAGGAGCAAGCCGAGAGCCAGCCGGCCGGCGCACTCCGACTCCGAGCAGTCTCTGTCCCTCGACCCGAGCCCGCGCCCTTCCGGGACCCCTGCCCGCGGGCAGCGCTGCCAACCTGCCGGCCATGGAGACC</u><br/> <u>CCGTCCGTGAGCAAGGGCGAGGAGCTGTTACCGGGGTGGTCCCATCTGGTTCGAGCTGGACGGCGACGTAACCGGCCA</u><br/> <u>CAAGTTCAGCGTGTCCGGCGAGGGCGAGGGCGATGCCACCTACGGCAAGCTGACCCTGAAGTTCATCTGCACCACCGGCAA</u><br/> <u>GCTGCCCGTGGCCCTGGCCACCCTCGTACCACCTGACCTACGGCGTGCAGTGTTCAGCCGCTACCCCGACCCACATGAA</u><br/> <u>GCAGCAGACTTCTCAAGTCCGCCATGCCGAAGGCTACGTCCAGGAGCGCACCATCTTCTCAAGGACGACGGCAACTAC</u><br/> <u>AAGACCCGCGCCGAGGTGAAGTTCGAGGGCGACACCCCTGGTGAACCGCATCGAGCTGAAGGGCATCGACTTCAAGGAGGA</u><br/> <u>CGGCAACATCCTGGGGCACAAGCTGGAGTACAACAGCCACAACGCTATATCATGGCCGACAAGCAGAAGAAGCGGC</u><br/> <u>ATCAAGGTGAAGTCAAGATCCGCCACAACATCGAGGACGGCAGCGTGCAGCTCGCCGACCACTACCAGCAGAACACCCCC</u><br/> <u>ATCGGGCAGCGCCCGTGTCTGCCGACAACCACTACCTGAGCACCCAGTCCGCCCTGAGCAAAGACCCCAACGAGAA</u><br/> <u>AGGGTCCGTGAACGGCCACGAGTTCGAGATCGAGGGCGAGGGCGAGGGCCGCCCTACGAGGTCATCAAGCAGCGGGC</u><br/> <u>CGCCACCCGACGCGGGCGCAGGCCAGCTCCACTCCGCTGTGCGCCACCCGCATCACCCGGCTGCAGGAGAAGGAGGAC</u><br/> <u>CTGCAGGAGCTCAATGATCGCTTGGCGGTCTACATCGACCGTGTGCGCTCGCTGGAAACGGAGAACCGAGGGCTGCGCCT</u><br/> <u>CGCATCACCGAGTCTGAAGAGGTGGTACGCCGCGAGGTGTCCGGCATCAAGGCCGCCTACGAGGCCGAGCTCGGATCC</u></p>            |
| <p><b>mCherry HR-donor plasmid, lamin A/C, 240bp HAs</b></p> <p><u>GGTACCCCGGGCGTCCGGTACTCAGTGTTCGCGGGAGCGCCGCACCTACACCAGCCAACCCAGATCCCGAGGTCCGACAGCGCCCGGCCAGATCCCCACGCCTGCCAGGAGCAAGCCGAGAGCCAGCCGGCCGGCGCACTCCGACTCCGAGCAGTCTCTGTCCCTCGACCCGAGCCCGCGCCCTTCCGGGACCCCTGCCCGCGGGCAGCGCTGCCAACCTGCCGGCCATGGAGACC</u><br/> <u>CCGTCCGAATTCATGGTGAAGGGCGAGGAGGATAACATGGCCATCATCAAGGAGTTCATGCGCTTCAAGGTGCACATGG</u><br/> <u>AGGGTCCGTGAACGGCCACGAGTTCGAGATCGAGGGCGAGGGCGAGGGCCGCCCTACGAGGTCATCAAGCAGCGGGC</u><br/> <u>GCTGAAGGTGACCAAGGGTGGCCCCCTGCCCTTCCGCTGGGACATCCTGTCCCCTCAGTTCATGTACGGCTCCAAGGCCTA</u><br/> <u>CGTGAAGCACCCCGCCGACATCCCGACTACTTGAAGCTGTCTTCCCGAGGGCTTCAAGTGGGAGCGCGTGTGACTT</u><br/> <u>CGAGGACGGCGCGTGGTGAACCGTGAACCGGACTCCTCCCTGACGAGGACGGCGAGTTCATCTACAAGGTGAAGTGCAGC</u><br/> <u>GCACCAACTTCCCCTCCGACGGCCCGTAATGCAGAAGAAGACCATGGGCTGGGAGGCCCTCCTCCGAGCGGATGTACCCCG</u><br/> <u>AGGACGGCGCCCTGAAGGGCGAGATCAAGCAGAGGCTGAAGCTGAAGGACGGCGGCCACTACGACGCTGAGGTCAAGACC</u><br/> <u>ACCTACAAGGCCAAGAAGCCCGTGCAGCTGCCGGCGCCTACAACGTCACATCAAGTGGACATCACCTCCACAAACGAG</u><br/> <u>GACTACACCATCGTGAACAGTACGAACGCGCCGAGGGCCGCCACTCCACCGCGGCATGGACGAGCTGTACAAGCAGCG</u><br/> <u>GCGCGCCACCCGACGCGGGGCGCAGGCCAGCTCCACTCCGCTGTGCGCCACCCGCATCACCCGGCTGCAGGAGAAGGAG</u><br/> <u>GACCTGCAGGAGCTCAATGATCGCTTGGCGGTCTACATCGACCGTGTGCGCTCGCTGGAAACGGAGAACCGAGGGCTGCGC</u><br/> <u>CTTCGATCACCGAGTCTGAAGAGGTGGTACGCCGCGAGGTGTCCGGCATCAAGGCCGCCTACGAGGCCGAGCTCGGATCC</u></p> |
| <p><b>EGFP TC-donor plasmid, lamin A/C, 240bp HAs</b></p> <p><u>ACTAGTCGTACATAACTACGGTAAATGGCCCGCCTGGCTGACCGCCCAACGACCCCGCCATTGACGTCAATAATGACGTA</u><br/> <u>TGTTCCCATAGTAACGCCAATAGGGACTTTCATTGACGTCAATGGTGGAGTATTTACGGTAAACTGCCACTTGGCAGTACAT</u><br/> <u>CAAGTGTATCATATGCCAAGTACGCCCCCTATTGACGTCATACGCGTAAATGGCCCGCCTGGCATTATGCCAGTACCT</u><br/> <u>TATGGGACTTTCTACTTGGCAGTACATCTACGTATTAGTCATCGCTATTACCATGGTGTGCGGTTTTGGCAGTACATCAATGGG</u><br/> <u>CGTGGATAGCGGTTGACTACGGGGATTTCGAAGTCTCCACCCATTGACGTCAATGGGAGTTTTGTTTTGGCACCAAAATCAA</u><br/> <u>CGGGACTTTCCAAAATGTCTGAACAACTCCGCCCATTTGACGCAAATGGGCGGTAGGGCGTGTACGGTGGGAGGTCTATATAAG</u><br/> <u>CAGAGTGGTTTTAGTGAACCGTACAGTCCGCTAGCGCGTCTGCCCTGGATGAGTCCGTGAGGACGAAACGGTACTCGGTACC</u><br/> <u>GTCCGGCAGACGCGTGAAGTCCGCTCGTAGGGCGCCTTGTGCGGACACCTCGCGGCTGACCACCTCTTACAGACTCGGTG</u><br/> <u>ATGCGAAGGGCGCAGCCCTGCGTTCCTCGTTTCCAGCGAGCGCACACGGTGCATGTAGACCGCCAAGCGATCATTGAGCTCCT</u><br/> <u>GCAGGCTCCTCTTCTCTGACGCCGGGTGATGCGGGTGGCGCAGCGGAGTGGAGCTGGCCTGCGCCCCGCTGCGGGTG</u><br/> <u>GCGCGCCCTGTTAGTGAACCGTCCATGCCAGCGTCTGCCCTGGATGAGTCCGTGAGGACGAAACGGTACTCGGTACC</u><br/> <u>CGCTTCTCGTTGGGGTCTTTGCTCAGGGCGGACTGGGTGCTCAGGTAGTGGTTGTGCGGCAGCAGCACGGGGCCGTCGCCG</u><br/> <u>ATGGGGGTGTTCTGCTGGTAGTGGTCCGCGAGCTGCAGCTGCCGTCTCGATGTTGTGGCGGATCTGAAGTTCACCTTGA</u></p>                                                                                                                                             |

TGCCGTTCTTCTGCTTGTCCGCCATGATATAGACGTTGTGGCTGTTGTAGTTGTA CTCCAGCTTGTGCCCCAGGATGTTGCCGT  
CCTCCTTGAAGTCGATGCCCTTCACTCGATGCGGTTACCAGGGTGTGCCCTCGAACTTACCTCGGCGCGGGTCTTGTA  
GTTGCCGTCGCTTGAAGAAGATGGTGCCTCTGGACGTAGCTTCCGGGCATGGCGGACTTGAAGAAGTCGTGCTGCTTC  
ATGTGGTCGGGTAGCGGCTGAAGCACTGCACGCCGTAGGTCAGGTTGGTACAGAGGGTGGGCCAGGGCACGGCAGCTT  
GCCGGTGGTGCAGATGAACCTCAGGGTCAGCTTCCGCTAGGTGGCATCGCCCTCGCCCTCGCCGGACACGCTGAACCTTGTG  
GCCGTTTACGTCGCGTCCAGCTCGACCAGGATGGGCACCACCCCGGTGAACAGCTCCTCGCCCTGCTCACGGACGGGGT  
CTCCATGGCCGGCAGGTTGGCAGCGCTGCCCGCGGGGCGAGGGTCCCGGAAAGGGCGCGGGGCTCGGGTGAAGGACAG  
AGACTGCTCGGAGTCGAGTGCGCCGCGGCTGGCTCTCGGCTTCTCCTGGCAGGCGTGGGATCTGGCCGGCGCT  
GTCGGACCTCGGGATCTGGTTGGCTGGTGTAGGTGCGGCGCTCCCGCAACACTGAGTCACCGACGCGGGCTCGAGCTC  
AAGCTTCCACCGCAATGCTTCTGAGATCTATATTGCGCAAGAAAGCACGAGCATCAGCCGTGCCTCCAGGTGCAATCTTCAA  
ATTGCACGAGCATCAGCCGTGCGGATCTATATTGCGCCAAGAAAGCACGAGCATCAGCCGTGCCTCCAGGTGCAATCTTCAA  
TGCACGAGCATCAGCCGTGCGGATCAATGTAAGTAAGTAAGCGTTTTTTTTGTGACGGTACCAGCCGGCCATGTTCCAGCC  
CCTCGTGGCGGGCGGTTGGCAACATTCCGAGGGGACCGTCCCTCGGTAATGGCGAATGGGACGGCCGGCGCAGCTTA  
GATCATAATCAGCCATAACCATTTGTAGAGTTTTACTTGTCTTAAAAAACCTCCACACCTCCCCCTGAACCTGAAACATAAAA  
TGAATGCAATTTGTTGTTTAACCTGTTTATTGACAGCTTATAATGTTTACAAATAAGCAATAGCATCACAAATTTACAAATAAAGC  
ATTTTTTCACTGCATTCTAGTTGTGGTTGTCCAAACTCATCAATGTATCTTAAAG

**mCherry TC-donor plasmid, lamin A/C, 240bp HAs**

ACTAGTCGTACATAACTTACGGTAAATGGCCCGCTGGCTGACCGCCCAACGACCCCGCCATTGACGTCAATAATGACGTA  
TGTTCCCATAGTAACGCCAATAGGGACTTCCATTGACGTCAATGGGTGGAGTATTTACGGTAAACTGCCACTTGGCAGTACAT  
CAAGTGATCATATCCAAGTACGCCCTTATTGACGTCAATGACGGTAAATGGCCCGCTGGCATTATGCCAGTACATGACCT  
TATGGGACTTTCTACTTGGCAGTACATCTAGCTATTAGTCATCGCTATTACCATGGTATGCGGTTTTGGCAGTACATCAATGGG  
CGTGGATAGCGTTTTGACTACGCGGGATTTCCAAGTCTCCACCCCTTACGCTCAATGGGAGTTTTGTTTTGGCACCAAAATCAA  
CGGGACTTTCCAAAATGTCGTAACAACCTCCGCCCTTACGCAAAATGGGCGGTAGGCGTGTACGGTGGGAGGTCTATATAAG  
CAGAGCTGGTTTTAGTGAACCGTACAGTCCGCTAGCGCGTCTGCCCTGGATGAGTCCGTGAGGACGAAACGGTACTCGGTACC  
GTCGGCAGACGCGTGAAGTCCGCTCGTAGGGCGCTGATGCCGGACACCTCGCGGCTGACCACCTTTCAGACTCGGTG  
ATCGAAGGCGCAGCTGCGTTCTCCGTTTTCCAGCGAGCGCACACGGTGCATGTAGACCAGCAAGCATATTGAGCTCCT  
GCAGGTCTCCTTCTCCTGCAGCCGGGTGATGCGGGTGGGCGACAGCGGAGTGGAGCTGGCCTGCGCCCGCTGCGGGT  
GCGCGCGCTGCTTGTACAGCTCGTCCATGCCGCGGTGGAGTGGCGGCCCTCGGCGGCTTCTGACTGTTCCAGATGGT  
TAGTCTCCTTGTGGGAGGTGATGTCCAACCTTGTGACGTTGAGGCGCCGGGCGAGCTGCACGGGCTTCTTGGCTTGT  
GGTGGTCTTGACCTCAGCGTGTAGTGGCCGCTCTTCACTTCACTTCACTTCACTTCACTTCACTTCACTTCACTTCACTT  
TCGGGTACATCCGCTCGGAGGAGCCCTCCAGCCATGGTCTTCTTCTGCATTACGGGGCCGTGGGAGGAAAGTGGT  
CCGCGCAGCTTACCTTGTAGATGAACCTCGCGTCTGCAGGGAGGAGTCTGGGTACGGTCAACCGCCGCGCTCCTCG  
AAGTTCATCAGCGCTCCCATGGAAGCCCTCGGGGAAGGACAGCTTCAAGTAGTCGGGGATGTCGGCGGGGTGCTTACG  
AGCCCTGGAGCGTACACTGAAGTGGGACAGGATGTCAGGCGCAAGGGCAGGGGCCACCCTTGGTCACTTCACTTCACT  
TGGCGGTCTGGGTGCCCTCGTAGGGCGGCCCTCGCCCTCGCCCTCGATCTCAACTCGTGGCCGATCAGGACGCCCTCA  
TGTGCACCTTGAAGCGCATGAACCTTGTGATGATGGCCATGTTATCCTCCTCGCCCTTGTCCACATGGACGGGGTCTCCATG  
GCCGGCAGGTTGGCAGCGCTGCCCGCGGGGCGAGGGTCCCGGAAAGGGCGCGGGGCTCGGGTGAAGGACAGAGACTGC  
TCGGAGTCGGAGTGCGCCGGCGGCTGGCTCCTGGCTTGTCTGGCAGGCGTGGGGATCTGGGCCGGGCGCTGTCGGAC  
CTCGGGATCTGGGTTGGCTGGTGTAGGTGCGGCGCTCCCGCAACACTGAGTCACCGACGCGGGAGATCTCGAGCTCAAG  
CTTCCACCGCAATGCTTCTGAGATCTATATTGCGCAAGAAAGCACGAGCATCAGCCGTGCCTCCAGGTGCAATCTTCAA  
GCACGAGCATCAGCCGTGCGGATCTATATTGCGCCAAGAAAGCACGAGCATCAGCCGTGCCTCCAGGTGCAATCTTCAA  
CAGGAGCATCAGCCGTGCGGATCAATGTAAGTAAGTAAGCGTTTTTTTTGTGACGGTACCAGCCGGCCATGGTCCAGCCTC  
CTCGTGGCGGGCGGTTGGCAACATTCCGAGGGGACCGTCCCTCGGTAATGGCGAATGGGACGGCCGGCCGACTTAGA  
TCATAATCAGCCATAACCATTTGTAGAGTTTTACTTGTCTTAAAAAACCTCCACACCTCCCCCTGAACCTGAAACATAAAATG  
AATGCAATTTGTTGTTTAACCTGTTTATTGACAGCTTATAATGTTTACAAATAAGCAATAGCATCACAAATTTACAAATAAAGCAT  
TTTTTCACTGCATTCTAGTTGTGGTTGTCCAAACTCATCAATGTATCTTAAAG

**EGFP HR-donor plasmid, FBL, 240bp HAs**

GGTACCAAGATGCAAGAGGAGAACATGAAGCCGACGAGGAGCAGTTGACCTTGGCCATATGAAAGAGACCATGCCGTGGTGC  
TGGGAGTGTACAGGTGAGCAGGGGCCAGCAATACACCAAGACAGACATCTCTGTCCCTTGCACCCCGAGTGCCATGATCCT  
GGGGTAGTAGACCCTCCTTATACCTATCTTCTCTCACAGGCCACCCGTGAGCAAGGGCGAGGAGCTGTTACCCGGGGTG  
GTGCCATCCTGGTGCAGCTGGACGGCGACGTAACGGCCACAAGTTACGCGTGTCCGGCGAGGGCGAGGGCGATGCCAC  
CTACGCCAAGCTGACCTGAAGTTCATCTGCACCACCGGCAAGCTGCCGTGCCCTGGCCACCCTCGTGAACCCCTGACC  
TACGGCGTGCAGTGTCTCAGCCGCTACCCCGACCACTGAAGCAGCAGCAGTCTTCAAGTCCGCCATGCCGGAAGGCTACG  
TCCAGGAGCGCACCATCTTCTTCAAGGACGACGGCAACTACAAGACCCGCGCCGAGGTGAAGTTCGAGGGCGACACCCTGG  
TGAACCGCATCGAGCTGAAGGGCATCGACTTCAAGGAGGACGGCAACATCCTGGGGCACAAGCTGGAGTACAACATAACAG  
CCACAACGTCTATATCATGGCCGACAAGCAGAAGAAGCGCATCAAGGTGAACCTCAAGATCCGCCACAACATCGAGGACGGCA  
GCGTGCAGCTCGCCGACCACTACCAGCAGAACACCCCATCGGCGACGGCCCGTGTGCTGCCCGACAACCACTACCTGA  
GCACCCAGTCCGCCCTGAGCAAGACCCCAACGAGAAGCGGATCACATGGTCTGCTGGAGTTCGTGACCGCCGCGGGGA  
TCACTCTCGGCATGGACGAGCTGTACAAGCCCAAGGTGAAGAACTGAAGTTCAGCGCTGTGAGGATTGCGAGAGATGTGT  
GATACTGTTGACGCTGTTTTCTATTAAGACTCATCCGTCTCCATGTCTGCTGCTCATTCTCCCTTGGCTGCTGACA  
CAGGAGACGACGCCCTTGGTCAATTTGCGGGGTTGGGTAATTTCTCACTCGTCCAGAGCGCATGCTCCGTTTCTAGCTG  
CCTTGGCGAGCGGCAGCCTGGGGATCC

**EGFP TC-donor plasmid, FBL, 240bp HAs**

ACTAGTATATTTGCATGTCGCTATGTGTTCTGGGAAATCACCATAAACGTGAAATGCTTTGGATTTGGGAATCTTATAAGTTCTGT  
ATGAGACCATCGACGGTCCAGGCTGCCGTCGCAAGGAGCTAGAAACGGAGCATGCGCTCTGTGACCGAGTGAGAA  
TTACCCAAACCCGCAAAATGACCAAGGTCGCTGCTCCCTGTGTCAGCAGGTCAAGGGGAGGAATGAGCAGCAGACATGGG  
AGACGGATGAGTCTTTAATAGAAAAACACAGTGAACAGTATCAACACACATCTCTCGCAATCCTGACAGCGCTGAACCTCA  
GTTCTTACCTTGGGCTTGTACAGCTCGTCCATGCCGAGAGTATCCCGCGCGGGTACGAACTCCAGCAGGACCATGTGA  
TCGCGCTTCTCGTTGGGGTCTTGTCTCAGGGCGGACTGGGTGCTCAGGTAGTGGTTGTGGGCGACGACAGGGGCCGCTCG

CCGATGGGGGTGTTCTGCTGGTAGTGGTCGGCGAGCTGCACGCTGCCGTCTCGATGTTGTGGCGGATCTTGAAGTTCACCT  
TGATGCCGTTCTTCTGCTTGTCCGCCATGATATAGACGTTGTGGCTGTTGTAGTTGTACTCCAGCTTGTGCCCCAGGATGTTGC  
CGTCTCTCTTGAAGTCGATGCCCTCAGCTCGATGCGGTTACCAGGGTGTCCGCTCGAACTTCACCTCGGCGCGGGTCTT  
GTAGTTGCCCGTCCCTTGAAGAAGATGGTGCCTCCTGGACGTCAGCTTCCGGGCATGGCGGACTTGAAGAAGTCGTGCTGC  
TTCATGTGGTCGGGGTAGCGGCTGAAGCACTGCACGCCGTAGGTGAGGGTGGTACGAGGGTGGGCCAGGGCACGGGCAG  
CTTGCCGGTGGTGCAGATGAACCTCAGGGTCAGCTTGCCGTAGGTGGCATCGCCCTCGCCCTCGCCGACACGCTGAACCTG  
TGGCCGTTTACGTCGCCGTCCAGCTCGACCAGGATGGGCACCACCCCGGTGAACAGCTCCTCGCCCTTGTCTACGGGTGGC  
CTGTGAGAGGAAGATAGGTGATGAAGGAGGGTCTACTACCCAGGATCATGGCACTCGGGGTCAAGGGACAGAGATGCTG  
TCTTGGTGTATTGCTGGGCCCTGCTCACCTGTACTCTCCACGACCACGGCATGGTCTCTTTCATATGGCTCAAGGGTCAACT  
GCTCCTGCGGCTTATGTTCTCCTGTTGCATCTTCTCGAGCTCAAGCTTCCACCAGCAATGCTTCTGAGATCTATATTGGCCAA  
GAAAGCAGGAGCATACGCCGTGCCCTCCAGGTGCAATCTTCAAAATGCACGAGCATCAGCCGTGCGGATCTATATTGGCCAAAG  
AAAACACGAGCATCAGCCGTGCCCTCCAGGTGCAATCTTCAAAATGCACGAGCATCAGCCGTGCGGATCAATATGAAGTAAAGTA  
AGCGTTTTTTTTGTCGACGGTACCGCCGGCCATGGTCCACGCTCTCGTGGCGGGCGGTGGGCAACATCCGAGGGGGGA  
CCGTCCCTCGGTAATGGCAATGGGACGCGGCCGCGACTCTAGATCATAATCAGCCATACCACATTTGTAGAGTTTTACTTG  
CTTTAAAAAACCTCCACACCTCCCCCTGAACCTGAAACATAAAATGAATGCAATTTGTTGTTAACTGTTTATTGCAGCTTATA  
ATGGTTACAATAAAGCAATAGCATCAAAATTTCAAAATAAAGCATTTTTTCACTGCATTCTAGTTGTGGTTGTCCAACTCA  
TCAATGTATCTTAAAG

**IRES-EGFP HR-donor plasmid, GAPDH, 500bp HAs**

GGTACCGGCTGTGGGCAAGGTATCCCTGAGCTGAACGGGAAGCTCACTGGCATGGCCTTCCGTGTCCCACTGCCAACGT  
GTCAGTGGTGGACCTGACCTGCCGTCTAGAAAAACCTGCCAAATATGATGACATCAAGAAGGTGGTGAAGCAGGCGTCCGGAG  
GGCCCTCAAGGGCATCTGGGCTACACTGAGCACCAGGTGGTCTCCTGACTTCAACAGCGACACCCACTCTCCACCT  
TTGACGCTGGGGTGGCTTCCCTCAACGACCACTTTGTCAAGTCACTTTCCTGATGTGGCTGGGCGACGAGACTGGCTC  
TTAAAAAGTGCAGGGTCTGGCGCCCTCTGGTGGCTGGCTCAGAAAAAGGGCCCTGACAACCTTTTTCATCTTCTAGGTATGAC  
AACGAATTTGGCTACAGCAACAGGGTGGTGGACCTCATGGCCACATGGCCTCCAAGGAGTAAGACCCCTGGACCACAGCC  
CCAGCAAGAGCACTAATTAATATAGTGAATTTCCCTCTCCCTCCCCCCCCCTAACGTTACTGGCCGAAGCCGCTTGG  
AATAAGGCGGTTGCTGCTATATGTTATTTCCACATATGCCCCTTTTTGGCAATGTGAGGGCCCGGACGACTGGCC  
TGCTTCTTGACGAGCATTCTAGGGGCTTTCCCTCTCGCCAAAGGAATGCAAGGTCTGTTGAATGTCGTGAAGGAAGCAG  
TTCTCTGGAAGCTTCTTGAAGACAACAACGCTGTGAGCGACCTTTGCAGGCAGCGGAACCCCCACCTGGCGACAGGTG  
CCTCTGCGGCCAAAAGCCACGTTAAGATACACCTGCAAAGGGCGGCAACCCCAAGTCCACGTTGTGAGTTGGATAGTTG  
TGGAAAGAGTCAAAATGGCTCTCCTCAAGCGTATTAACAAGGGGCTGAAGGATGCCAGAGAGTACCCATTGTATGGGATCT  
GATCTGGGGCTCGGTGCACATGCTTTACATGTGTTAGTTCAGGTTAAAAAACGCTTAGGCCCCCGAACCCAGGGGACGT  
GGTTTTCTTTGAAAAACACGATGATAATATGGCCACAATGGTGCACCTCATCGTGAAGGCGGAGGAGCTGTTACCCGGG  
GTGGTGCACATCCTGGTGCAGCTGGACGGCGACGTAACCGGCCACAAGTTCAGCGTGTCCGGCGAGGGCGAGGGCGATGC  
CACCTACGGCAAGTACCTGAAGTTCATCTGCACCACCGGCAAGCTGCCCTGCCCTGGCCACCCCTGTCGACCACCTG  
ACCTACGGCGTGCAGTGTCTGACCCGCTACCCCGACACATGAAAGCAGCAGCACTTCTCAAGTCCGCTGACCCGAAAGCT  
ACGTCAGGAGCGCACCATCTTCAAGGACGACGGCAACTACAAGACCCGCGCGGAGGTGAAGTTCGAGGGCGACACCC  
TGGTGAACCGCATCGAGCTGAAGGGCATCGACTTCAAGGAGGACGGCAACATCCTGGGGCACAAGCTGGAGTACAACACTACA  
CAGCCACAACGTCTATATCATGGCCGACAAGCAGAAGAACGGCATCAAGTGAACCTCAAGATCCGCCACAACATCGAGGACG  
GCAGCTGCAGCTCGCCGACCACTACCAGCAGAACAACCCCACTCGGCGACGGCCCGTGGTGTGCTGCTGACCCGACCACTACC  
TGAGCACCCAGTCCGCCCTGAGCAAAGACCCCAACGAGAAGCGCGATCACATGGTCTGCTGGAGTTCGTGACCGCCGCGG  
GGATCACTCTCGGCATGGACGAGCTGTACAAGTAGACCGGTGATCGAAGAGGAAGAGAGACCCTCACTGCTGGGGAGTC  
CCTGCCACACTCAGTCCCCACCACACTGAATCTCCCTCCTCACAGTTGCCATGTAGACCCCTTGAAGAGGGGAGGGGCT  
AGGAGCCGCACTTGTCTGATGACCATCAATAAGTACCCTGTGCTCAACAGTACTTGTCTGCTGCTTATTCTAGGGTCTGGG  
GCAGAGGGGAGGGAAGCTGGGCTTGTGTCAAGGTGAGACATTCTGCTGGGGAGGGACCTGGTATGTTCTCCTCAGACTGAG  
GGTAGGGCCTCAAACAGCCTTGTCTGCTCGAGAACCATTGCTTCCGCTCAGACGCTTGTAGTGTACAGGAAGCTGGCA  
CCACTACTTCAGAGAACAAGGCCCTTTCTCTCCTCGCTCCAGTCTTAGGCTATCTGCTGTTGGCCAAACATGGAAGAAGCTAT  
TCTGTGGCAGCCCCAGGGAGGTGACAGGTGGAGGAAGTCAGGGCTCGCGGATCC

**mCherry-GFP reporter point mutation HR-donor plasmid, GAPDH, 240bp HAs**

CTCGAGCGACGCTGAGGTCAAGACCACCTACAAGGCCAAGAAGCCCGTGCAGCTGCCCGGCGCCTACAACGTCAACATCAA  
GTTGGACATCACCTCCACAACGAGGACTACACCATCGTGAACAGTACGAACGCGCCGAGGGCCGCCACTCCACCGGCGG  
CATGGACGAGCTGTACAAGCTGCAGGGCGGAGGAGGCAGCGGGCGGAGGAGGCAGCGGCGGAGGAGGCAGCGCTGCTCG  
CGATGCTAGAGGGCTCTGCCAGTGAACAAGGGCGAGGAGCTGTTCCCGGGTGGTGGCCATCTGCTGCTGCTGCTGCTGCTG  
GACGTAACCGGCCACAAGTTCAGCGTGTCCGGCGAGGGCGAGGGATGCCACCTACGGCAAGCTGACCTGAAAGTTCATCT  
GCACCACCGGCAAGCTGCCCGTGCCTGGCCACCCTCGTACCACCTGACCTACGGCGTGCAGTGTTCAGCCGCTACC  
CCGACGCGT

**mCherry-GFP reporter point mutation TC-donor plasmid, GAPDH, 240bp HAs**

CGTTACATAACTTACGGTAAATGGCCGCTGGCTGACCGCCCAACGACCCCGCCATTGACGTCAATAATGACGTATGTTCC  
CATAGTAACGCCAATAGGGACTTTCCATTGACGTCAATGGGTGGAGTATTTACGGTAAACTGCCCACTTGGCAGTACATCAAGT  
TATCATATGCCAAGTACGCCCTTATTGACGTCAATGACGGTAAATGGCCGCTGGCATTATGCCAGTACATGACCTTATGGG  
ACTTTCTACTTGGCAGTACATCTACGTATTAGTTCATCGCTATACCATGGTGTGATCGGTTTTGGCAGTACATCAATGGCGTGG  
ATAGCGGTTGACTCAGGGGATTTCAAAGTCTCCACCCATTGACGTCAATGGGAGTTGTTTTGGCACCAAAATCAACGGGA  
CTTTCCAAAATGTCGTAACAACCTCCGCCCTTGAACGCAAAATGGCGGTGACGGTGTACGGTGGGATGATATAAGCAGAG  
CTGGTTAGTGAACCGTCAAGTCCGCTAGCGCGTCTGCCCTGGATGAGTCCGTGAGGACGAAACGGTACTCGGTACCGTCCG  
CAGACGCGTGGGGTAGCGGCTGAAGCACTGCACGCCGTAGGTGAGGGTGGTACGAGGGTGGGCCAGGGCACGGGCAGC  
TTGCCGGTGGTGCAGATGAACCTCAGGGTCAAGTTCCGCTAGGTGGCATCGCCCTCGCCCTCGCCGACGCTGAACCTTGT  
GGCGTTTACGTCGCCGCTGACGCTGACCCAGGATGGGACCACCCCGGTGAACAGCTCCTCGCCCTGACTCGGCTGACGAG  
CTCTTAGCATCGGAGCAGGGCTGCCTCCTCCGCGCTGCCTCCTCCGCGCTGCCTCCTCCGCCCTGCAGCTTGTACAG  
CTCGTCCATGCCGCGGTGGAGTGGCGGCCCTCGGCGGCTTCTGACTGTTCCACGATGGTGTAGTCTCGTTGTGGGAGGT  
GATGTCAAATGATGTTGACGTTGTAGGCGCCGGGAGCTGCACGGGCTTCTGGCCTGTAGGTGGTCTTACCTCAGCG

TCGCTCGAGCTCAAGCTTCCACCGCAAATGCTTCTGAGATCTATATTCGGCCAAGAAAGCACGAGCATCAGCCGTGCCTCCAG  
GTGCAATCTTCAAATGACGAGCATCAGCCGTGCGGATCTATATTCGGCCAAGAAAGCACGAGCATCAGCCGTGCCTCCAGG  
TCGAATCTTCAAATGACGAGCATCAGCCGTGCGGATCAATATGTAAGTAAGTAAGCGTTTTTTTTGTGCGACGGTACCGCCGG  
CCATGGTCCCAGCTCCTCGCTGCGCGCCGGTGGGCAACATTCAGAGGGGACCGTCCCCTCGGTAATGGCGAATGGGACG  
CGGCCGCGACTCTAGATCATAATCAGCCATACCACATTTGAGAGGTTTTACTTGTCTTAAAAAACCTCCCACACCTCCCCTGA  
ACCTGAAACATAAAATGAATGCAATTGTTGTTGTTAACTTGTATTGACAGCTTATAATGGTTACAAATAAAGCAATAGCATCACAA  
ATTTCAAAATAAAGCATTTTTTTCACTGCATTCTAGTTGTGGTTTGTCCAAACTCATCAATGTATCTTA

**IRES-EGFP TC-donor plasmid, GAPDH, 500bp HAs**

ACTAGTCGTTACATAACTTACGGTAAATGGCCCGCTGGCTGACCGCCCAACGACCCCCGCCATTGACGTCAATAATGACGTA  
TGTTCCCATAGTAACGCCAATAGGGACTTTCCATTGACGTCAATGGGTGGAGTATTTACGGTAAACTGCCACTTGGCAGTACAT  
CAAGTGTATCATATGCCAAGTACGCCCCCTATTGACGTCAATGACGGTAAATGGCCCGCTGGCATTATGCCAGTACATGACCT  
TATGGGACTTTCTACTTGGCAGTACATCTACGTATTAGTCATCGCTATTACCATTGGTGTGCGGTTTTGGCAGTACATCAATGGG  
CGTGGATAGCGGTTTTGACTCACGGGATTTCCAAGTCTCCACCCATTGACGCAATGGCGGTAGGCGTGTACGGTGGGAGGTCTATATAAG  
CGGGACTTTCCAAAATGTCGTAACAACCTCCGCCCATGACGCAATGGCGGTAGGCGTGTACGGTGGGAGGTCTATATAAG  
CAGAGCTGGTTTTAGTGAACCGTCAGATCCGCTAGCGCGTCTGCCCTGGATGAGTCCGTGAGGACGAAACGGTACTCGGTACC  
GTCGGCAGACGCGTGCAGCCCTGACTTCTCCACCTGTCAGCCTCCCTGGGGCTGCCACAGAATAGCTTCTTCCATGTTT  
GGCCAACAGCAGATGAGCTAGGACTGGAGCGAGGAGGAAAAGGCCCTTGTCTCTGAAGTAGTGGTCCAGCTTCTGTTAG  
CACTCAAGACGTCTGAGCGGGAAGCAAATGGTTCTCGAAGCAAGCAAGGCTGTTTGGAGGCCCTACCCTCAGTCTGAGGAGA  
ACATACCAGGTCCCTCCCAGCAAGAATGTCTCACCTTGACACAAGCCAGCTTCCCTCCCCTCTGCCCCAGACCCTAGAATA  
AGACAGGACAAGTAACTGGTTGAGCACAGGGTACTTTATTGATGGTACATGACAAGTGCAGGCTCCCTAGGCCCTCCCCTCT  
TCAAGGGGTCTACATGGCAACTGTGAGGAGGGGAGTTCAGTGTGGTGGGGACTGAGTGTGGCAGGGACTCCCAGCAGT  
GAGGCTCTCTCTCTCTCTCTCTCGATCGACCGCTCTTGTACAGCTCGCTCCATGCCGAGAGTGAATCCCGGCGCGGTACGGA  
ACTCCAGCAGGACCATGTGATCGCGCTTCTCGTTGGGGTCTTTGCTCAGGGCGGACTGGGTGCTCAGGTAGTGGTTGTCGGG  
CAGCAGCAGGGGGCGTCCCGATGGGGGTGTTCTGCTGGTAGTGGTCCGCGAGCTGCACGCTGCCCTCCTCGATGTTGTG  
CGGGATCTTGAAGTTCACCTTGATGCCGTTCTTCTGCTTGTCCGCCATGATATAGACGTTTGGGCTGTTGTAGTTGACTCCAG  
CTTGTGCCCCAGGATGTTGCCCTCCCTTGAAGTCTGACCTTCCAGCTCGATGCCGTTACCAGGGTGTCCGCTCGAAC  
TTCACCTCGGCGCGGGTCTTGTAGTTGCCGTCTCTTGAAGAAGATGGTGCCTCCTGGACGTAGCCTTCGGGCATGGCGG  
ACTTGAAGAAGTCGTGCTGCTTATGTGGTCCGGGTAGCGGCTGAAGCACTGCACGCCGTAGGTCAGGGTGGTCCAGAGGG  
TGGGCCAGGGCAGGGCAGCTTCCCGGTGGTGCAGATGAATTCAGGGTCAGCTTCCCGTAGGTTGGCCTCGCCCTCGCCCT  
CGCCGGACACGCTGAATGTGGCCGTTTACGTCCCGCTCCAGCTGCACAGGATGGGCACCACCCCGGTGAACAGCTCCT  
CGCCCTTGTCTCAGCATGAGGTGACCCATTGTGGCCATATTATCATCGTGTCTTCAAAGGAAAACCACGTCCCCTGGTTCCGG  
GGCCTAGACGTTTTTTAACCTCGACTAAACACATGTAAGCATGTGCACCGAGGCCCCAGATCAGATCCATACAATGGGGT  
ACCTTCTGGGCATCCTTCCAGCCCTTGTGAAATACGCTTGGAGGAGGCCATTTGACTCTTCCACAACATCCAATCACAAGG  
TGGACTGGGTTGTGCCGCTTTCAGGTGTATCTTATACACGTGGCTTTTGGCCGACAGGACCTTCCGCAAGTGGTCCAGG  
GTTCCGCTCGCTGCAAGGGTGCCTACAGACGTTGTTTGTCTTCAAGAAGCTTCCAGAGGAAGTCTTCTTCCACGACATTC  
AACAGACCTTGCATTCTTTGGCGAGAGGGGAAAAGACCCCTAGGAATGCTCGTCAAGAAGACAGGGCCAGGTTTTCCGGGCC  
TCACATTGCCAAAAGACGGCAATATGGTGGAAAATAACATATAGACAACGCACACCCGGCTTATTCCAAGCGGCTTCGGCCAG  
TAACGTTAGGGGGGGGGGAGGGAGAGGGGAATTTCACTCACTATATAAATAGTGTCTTGTGCTGGGCTGGTGGTCCAGGGG  
TCTTACTCCTTGGAGGCCATGTGGGCCATGAGGTCCACCCCTGTTGCTGTAGCCAAATTCGTTGTACCTAGAAGATGAA  
AAGAGTTGTCAGGGCCCTTTTTCTGAGCCAGCCACCAGAGGGCGCCAGACCCTGCACTTTTTAAGAGCCAGTCTCTGGCCCC  
AGCCACATACCAGGAAATGAGCTTGACAAAGTGGTCTTGGAGGGCAATGCCAGCCCAAGCGTCAAAGGTGGAGGAGTGGGTG  
TCGCTGTTGAAGTCAGAGGAGACCACCTGGTCTCAGTGTAGCCAGGATGCCCTTGGAGGGGGCCCTCCGACGCCTGCTTCA  
CCACCTTCTGATGTCATATTTGGCAGTTTTCTAGACGGCAGGTAGTCCACCAGTACAGTGGCAGTGGGAGGAC  
CGGAAGGCCATGCCAGTGAAGTTCCTCGTTCAGCTCAGGGATGACCTTGGCCACAGCCCTCGAGCTCAAGCTTCCACCGCAA  
TGCTTCTGAGATCTATATTCGGCCAAGAAAGCACGAGCATCAGCCGTGCCTCCAGGTGCAATCTTCAAATGACAGGATCAGC  
CCGTGCGGATCTATATTCGGCCAAGAAAGCACGAGCATCAGCCGTGCCTCCAGGTGCAATCTTCAAATGACAGGATCAGC  
CGTGGGATCAATATGTAAGTAAGTAAGCGTTTTTTTTGTCGACGGTACCAGCCGCGCATGGTCCAGCCTCCTCGCTGGCGC  
CGGTGGGCAACATTCGAGGAGTGCAGGCGGCTCCCTCGGTAATGGCAATGGGACGCGCGGCTAGATCATAATCAGCCA  
TACCACATTTGAGAGGTTTTACTTGTCTTAAAAAACCTCCCACACCTCCCCTGAACCTGAAACATAAAATGAATGCAATTGTTG  
TTGTTAACTTGTATTGACAGCTTATAATGGTTACAAATAAAGCAATAGCATCACAAATTTCAAAATAAAGCATTTTTTTCACTGCA  
TTCTAGTTGTGGTTTGTCCAAACTCATCAATGTATCTTAAG

**PRNP point mutation TC-donor plasmid, 240bp HAs**

ACTAGTCGTTACATAACTTACGGTAAATGGCCCGCTGGCTGACCGCCCAACGACCCCCGCCATTGACGTCAATAATGACGTA  
TGTTCCCATAGTAACGCCAATAGGGACTTTCCATTGACGTCAATGGGTGGAGTATTTACGGTAAACTGCCACTTGGCAGTACAT  
CAAGTGTATCATATGCCAAGTACGCCCCCTATTGACGTCAATGACGGTAAATGGCCCGCTGGCATTATGCCAGTACATGACCT  
TATGGGACTTTCTACTTGGCAGTACATCTACGTATTAGTCATCGCTATTACCATTGGTGTGCGGTTTTGGCAGTACATCAATGGG  
CGTGGATAGCGGTTTTGACTCACGGGATTTCCAAGTCTCCACCCATTGACGTCAATGGGAGTTTTTTTTGGCACCAAAATCAA  
CGGGACTTTCCAAAATGTCGTAACAACCTCCGCCCATGACGCAATGGCGGTAGGCGTGTACGGTGGGAGGTCTATATAAG  
CAGAGCTGGTTTTAGTGAACCGTCAGATCCGCTAGCGCGTCTGCCCTGGATGAGTCCGTGAGGACGAAACGGTACTCGGTACC  
GTCGGCAGACGCGTCTCCATCATTTAACGTCGGTCTCGGTGAAGTTTCCCCCTTGGTGGTTGTGGTGACCGTGTGCTGCTT  
GATTGTGATATTGACGAGTGCACAAAAGTTTCTGTTGCTGACTCATCCATGGCCCTGTATACACTTGGTTGGGTA  
ACGGTGCATGTTTTACGATAGTAACGGTCTCATAGTCACTGCCGAAATGTATGATGGGCCTGCTCATGGCACTTCCCAGCAT  
GTAGACGCCAAGGCCCCCACTGCCCCAGCTGCTGACAGCACCAGCCATGTGCTTTCATGTTGGTTTTGGCTTACTCGGCT  
TGTTCCACTGACTGTGGGTGCCACCTCCTTGAACCCAGCCACCACCATGAGGCTGTCCCCAGCCACCACCATGGGGTGGCC  
CCAGCCACCACCATGAGGCTGCCCCAGCCACCACCATGAGGCTGCCCCAGCCACCACCGCTGAGGTGGGTAGCGGTC  
TCGAGCTCAAGCTTCCACCGCAAATGCTTCTGAGATCTATATTCGGCCAAGAAAGCACGAGCATCAGCCGTGCCTCCAGGTGCA  
AATCTTCAAATGACAGGATCAGCCGTGCGGATCTATATTCGGCCAAGAAAGCACGAGCATCAGCCGTGCCTCCAGGTGCA  
ATCTTCAAATGACAGGATCAGCCGTGCGGATCAATATGTAAGTAAGTAAGCGTTTTTTTTGTGACGGTACCGCCGGCCATG

GTCCAGCCTCCTCGCTGGCGGCCGGTGGGCAACATTCGAGGGGGACCGTCCCCTCGGTAATGGCGAATGGGACGCGGC  
CGC

**IRES-EGFP-Lamin TC-donor plasmid, GAPDH, 500bp HAs**

ACTAGTCGTACATAACTACGGTAAATGGCCCCGCTGGCTGACCGCCCAACGACCCCCGCCATTGACGTCAATAATGACGTA  
TGTTCCCATAGTAACGCCAATAGGGACTTTCCATTGACGTCAATGGGTGGAGTATTTACGGTAAACTGCCCACTTGGCAGTACAT  
CAAGTGTATCATATGCCAAGTACGCCCCCTATTGACGTCAATGACGGTAAATGGCCCCGCTGGCATTATGCCAGTACATGACCT  
TATGGGACTTTCTACTTGGCAGTACATCTACGTATTAGTCATCGCTATTACCATGGTGTATGCGGTTTTGGCAGTACATCAATGG  
CGTGGATAGCGGTTTGACTACCGGGGATTTCGAAGTCCACCCCAATTGACGTCAATGGGAGTTTTGTTTTGGCACCAAAATCAA  
CGGGACTTTCCAAAATGTCGTAACAACCTCCGCCCATTTGACGCAAATGGGCGGTAGGCGGTGTACGGTGGGAGGTCTATATAAG  
CAGAGCTGGTTTTAGTGAACCGTCAGATCCGCTAGCGCGTCTGCCCTGGATGAGTCCGTGAGGACGAAACGGTACTCGGTACC  
GTCCGGCAGACGCGTGCAGGCCCTGACTTCCCTCCACTGTGACGCTCCCTGGGGCTGCCACAGAATAGCTTCTTCCATGTTT  
GCCCAACAGCAGATAGCCTAGGACTGGAGCGAGGAGGAAAAGGCCCTTGTCTCTGAAGTAGTGGTCCAGCTTCTCTGTAG  
CCTCAAGACTGTGAGCGGGAAGCAAATGGTTCTCGAAGCAAGCAAGGCTGTTTTGGAGGCCCTACCTCAGCTGAGGAGA  
ACATACCAGGTCCCTCCCAGCAAGAATGTCTCACCTTGACACAAGGCCAGCTTCCCTCCCCTCTGCCCCAGACCCTAGAATA  
AGACAGGACAAGTAACTGGTTGAGCACAGGGTACTTTATTGATGGTACATGACAAGGTGCGGCTCCCTAGGCCCTCCCTCT  
TCAAGGGGTCTACATGGCAACTGTGAGGAGGGGAGATTCAAGTGTGGTGGGGACTGAGTGTGGCAGGGACTCCCAGCAGT  
GAGGGTCTCTCTCTCTCGATCGTCAGCGGGCTCACCTACTCTGATTCTCATCACAAGTGAACAATGGGG  
GAAAAGAGACTAATGACAGTAATTAATGTTCCAGCTTGAAATACAAGAACCAAAACAGGACACTTACTAAGACAGAGGTTA  
GATGTTACCAGAGGCCATCAATAGATCCACACTACTCTACCCTTGATTTATCAGAATAAACATTAATTTGGATTTAAAAAGAG  
CAAGCTGAATAAAGCTCGTATTTGCTTTGGATGTCACAGTTGATCAAAAATCCATCTTCAATATGGGGGAAAGCCATGTGAATCT  
ATGATTACCAATGGTGCACACAGGTACAAAAGGAGCAAATCAAATGACATTCCTGCTGAATGTCAGGAATGGCCATTTTGGT  
GAAAGCAAGCTTACGCTTGTCCCCAGTATAGACTTTGTGGATAAAAATAAAGATAGAAATACTGCATAAGAACTCACTTGGTCAT  
CTTCTCTTCAATGTCATCTCGAATACCCTGGAAAACAAGCGGAGAAAACAACCTTCCCTGCAATGTTCCACATACCCAGCTC  
CATACTTACAGCAGATTAGTGTGAAATCCACACAGCAGCAAGAACTCAACACTAATAATAACAAAGCAGCAATGAGCACACTAT  
AAACTATCCACCCCATATATATGTGTAGCTGCATCTATAATCTGCACTTGCAGTTTGCATTTCTTTAAATGGGATGATATGATACCCCT  
AGAAACAGCGGTTTACCAACAGGATATCAGACGTAAAAAATTTCTGAAGACAGATACCAAAATGGTCTAGTTTTGTGAATCCATA  
CAACAAACAATGCGGTTGTGAAAAGTATTTCACTAAAAAGAAAAAATACTTGTATTTGGCATATACTAGAAAAGTCCACAAC  
CTTCTTATTGTCCCAAAGTTTCTAGCTTAGGGTAAATGGTTTTAGCCAAAAGCAGTTACCTTAGGGATGGGGACAGAGTGAA  
AAGTCACTAATCCTTTATGAGTTTGGGAATAAAACGCTTAAACAGTTACATGGAGAAGGGGACCATCACCACTTGCTGTATG  
TCTCAGGACTATAGAGAAAATAGTTGCTTAGTTCCCAACACCTGTTTCTAATCAGACTTTTCTCCTAACCTAGAGCGCTT  
GCTATTCCTAAGGCAACCGGCAAGCAACACCAGTGCAGGGCAGTTGGAAGGGGATATGACATACAGTGAATACCAAAACC  
ACAGCTAAATCTCCATATGGAACAGAAACCTGGTAAAGGACTGAAGCACTGACTGCCAAGCACAGGAGTGGCTGCATCTTGT  
CAGCTCGTCCATGCCGAGAGTATCCCGGGCGGGTACGAACTCCAGCAGGACCATGTGATCGCGCTTCTCGTTGGGGTCT  
TTGCTCAGGGCGGACTGGTGTCTCAGGTAGTGGTTGTGGGACGACGACGGGGCCGTCGCGGATGGGGGTGTTCTGCTG  
GTAGTGGTCCGGCAGCTGCACGCTGCCGCTCTCGATGTTGTGGCGGATTTGAAGTCACTTGCATGCGGCTTCTTGTGT  
CGGCCATGATATAGACGTTGTGGCTGTTGAGTTGACTCCAGCTTGTGCCCCAGGATGTTGCCGTCCTCCTGAAGTCGATGC  
CCTTCAGCTCGATGCGGTTACCAGGGTGTCCGCCCTCGAATTCACCTCGGGCGGGTCTTGTAGTTGCCGTCGCTCCTTGA  
GAAGTGGTGGCTCCTGGACGTAGCCTTCGGGCATGGCGGACTTGAAGAAGTGTGCTGCTTATGTTGGTGGGGTAGCGG  
CTGAAGCACTGCACGCGTAGGTGAGGTGGTACGAGGTTGGGCCAGGGCACGGGACGCTTGGTGGTGCAGATGAA  
CTTCAGGGTACGCTTGGCGTAGGTGGCATCGCCCTCGCCCTCGCCGGACACGCTGAACCTTGTGGCCGTTTACGTCGCCGTC  
AGCTCGACCAGGATGGGCACCACCCCGGTGAACAGCTCCTCGCCCTGCTCAGCATGAGGTGACCATTTGTGGCCATATTATC  
ATCGTGTTTTTCAAAGGAAAACACGTCCTCCGTTGTTGGGGGGCCTAGACGTTTTTTAACTCGACTAAACACATGTAAGC  
ATGTGCACCGAGCCCCAGATCAGATCCCATACATAAGGTTACCTTGGGATCCTTACAGCCCTTGTGTAATACGTTGAGG  
AGAGCCATTTGACTCTTTCCACAACCTATCCAACCTACAACGTTGGCACTGGGGTTGTGCCGCTTTGCAGGTGTATCTTATAC  
GTGGCTTTTGGCCGACAGGACCTGTCCGAGGTTGGGGGTTCCGCTGCCTGCAAAGGGTGCCTACAGACGTTGTTTGT  
TTCAAGAAGCTTCCAGAGGAAGTCTTCCCTCACGACATTCAACAGACCTTGCATTCCTTTGGCAGAGGGGAAAAGACCCCTA  
GGAATGCTCGTCAAGAAGCAGGGGCCAGGTTCCGGGCCCTCACATTTGCCAAAAGACGGCAATAGTGGGAAAATACATATA  
GACAAAACGACACCCGCTTATCCAAAGCGGCTTCCGGCTTCCGAGTAACTGTTAGGGGGGGGAGGGGAAAGGAAATTTCACTCA  
CTATATTAATAGTGTCTTGTGTTGGGCTGGTGGTCCAGGGTCTTACTCCTTGGAGGCCATGTGGGCCATGAGGTCCACCA  
CCCTGTTGCTGTAGCCAAATTCGTTGTACATCTAGAAGATGAAAAGAGTTGTGAGGGCCCTTTTTCTGAGCCAGCCACCAGAG  
GGCGCCAGACCCTGCATTTTTAAGAGCCAGTCTCTGGCCCCAGCCACATACCAGGAAATGAGCTTGACAAAGTGGTGTGTTGA  
GGCAATGCCAGCCCCGCGTCAAAGGTGGAGGAGTGGTGTGCTGTTGAAGTCAAGAGGAGACCCACTGGTGTCTCAGTGT  
AGCCAGGATGCCCTTGGGGGGCCCTCCGACGCTGCTTACCACCTTCTTGTGTCATCATATTTGGCAGGTTTTTCTAGAC  
GGCAGGTGAGGTCCACCCTGACACGTTGGCAGTGGGGACACGGAAGGCCATGCCAGTGTGCTTCCGTTACGCTCAGGGA  
TGACCTTGGCCACAGCCCTCGAG

**PRNP point mutation HR-donor plasmid, 240bp HAs**

CTCCATCATCTAACGTCGGTCTCGGTGAAGTTCTCCCTTGGTGGTGTGGTGACCGTGTGCTGCTTATTGATGATATTGAC  
GCAGTCGTGCACAAAGTTGTTCTGGTTGCTGTACTCATCCATGGGCCTGTAGTACACTTGGTTGGGGTACGGTGCATGTTTT  
ACGATAGTAACGGTCTCATAGTCACTGCCGAATGTATGATGGGCTGCTCATGGCACTTCCCAGCATGTAGACGCCAAGGCC  
CCCCACCACTGCCCCAGCTGCTGCAGCACCAGCCATGTGCTTCAATGTTGGTTTTGGCTTACTCGGCTTGTCCACTGACTGT  
GGGTGCCACTCCTTACCACCCAGCCAGGCTGAGGCTGTCCCAAGCCACCCATGAGGCTGGGCTGCCCCAGCCACCACCAT  
GAGGCTGCCCCAGCCACCACCATGAGGCTGCCCCAGCCACCACCCCTGAGGTGGGTAGCGGT

**IRES-GFP-Lamin HR-donor plasmid, FBL, 240bp HAs**

CTCGAGAAGATGCAACAGGAGAACATGAAGCCGACAGGACAGTTGACCTTGTAGCCATATGAAAGAGACCATGCCGTGGTCCG  
TGGGAGTGTACAGGTGAGCAGGGGCCAGCAATACCAAGACAGACATCTGTCCCTTGCACCCCGAGTGCCATGATCCT  
GGGGTAGTAGCCCTCTTCTACCTATCTTCTCTCACAGGCCACCCAACTTACTGGCCGAAGCCCTTGGAAATAAGGCC  
GGTGTGCGTTTTGTCTATATGTTATTTCCACCATATTGCCGCTTTTTGGCAATGTGAGGGCCCGGAAACCTGGCCCTGTCTTCT  
GACGAGCATTCTAGGGGCTTTTCCCTCTCGCCAAAGGAATGCAAGGTCTGTTGAATGTCGTGAAGGAAGCAGTTCTCTGG  
AAGCTTCTTGAAGACAAACAACGCTGTAGCGACCTTTGCAGGCAGCGGAACCCCCACCTGGCGACAGGTGCCTCTGCGG

CCAAAAGCCACGTGTATAAGATACACCTGCAAAGGCGGCACAACCCCAGTGCCACGTTGTGAGTTGGATAGTTGTGGAAGAG  
TCAAATGGCTCTCCTCAAGCGTATTCAACAAGGGGCTGAAGGATGCCAGAAAGTACCCCATTTGATGGGATCTGATCTGGGG  
CCTCGGTACACATGCTTTACATGTGTTAGTCGAGGTTAAAAAACGCTTAGGCCCCCCGAACCACGGGGACGTGGTTTTCCCTT  
TGAAAAACACGATGATAATATGGCCACAATGGTCACCTCATCTGTAGCAAGGGCGAGGAGCTGTTACCCGGGGTGGTGCCCA  
TCCTGGTCGAGCTGGACGGCGACGTAACGGCCACAAGTTCAGCGTGTCCGGCGAGGGCGAGGGCGATGCCACCTACGGCA  
AGCTGACCCTGAAGTTCATCTGCACCACCGGAAGCTGCCCGTGCCTTGGCCACCCCTCGTGACCACCTGACCTACGGCGT  
GCAGTGCTTACCGCGTACCCCGACCACATGAAGCAGCAGACTTCTTCAAGTCCGCCATGCCCGAAGGCTACGTCCAGGAG  
CGCACCATCTTCAAGGACGACGGCAACTACAAGACCCGCGCCGAGGTGAAGTTCGAGGGCGACACCCCTGGTGAACCCG  
ATCGAGCTGAAGGGCATCGACTTCAAGGAGGACGGCAACATCCTGGGGCACAAGCTGGAGTACAACACAACAGCCACAACG  
TCTATATCATGGCCGACAAGCAGAAGAACGGCATCAAGGTGAACCTCAAGATCCGCCACAACATCGAGGACGGCAGCGTGCAG  
CTCGCCGACCATACCAGCAGAACACCCCATCGGGCAGCGCCCGCTGCTGCTGCCGACAACCACCTACTCGAGCACCAG  
TCCGCCCTGAGCAAGACCCCAACGAGAAGCGGCATCATAGTCTGCTGGAGTTCGTGACCAGCGCCGGGATCACTCTC  
GGCATGGACGAGTGTACAAGACCGGTATGACAGCCACTCTGTCTTGGCAGTCAGTCTTCAAGTCTTTACCAGGGTTTCTG  
TTCCATATGGAGATTTAGCTGTGGTGCCTTCTTCTGCTTCTTCTGCTCGTCTTGTGCGGGCTGCGGGTGTGGTGGTGC  
GGGTGGAGGAGCCGGCGTGTCTGCTTCCGCTTCCGTCATGATTTCTTCTGCCGGACCTCCTTTCGATCTCCTCCAG  
CGTGCCCTCCTCGATGGCCTTGAACACTGCTTCTCCGTCAGTGAAGTGCAGTCCACCTCCTTGGGTGGCGGGAGCCA  
CGGCCGAACACTTCTCCTCCTCCTCACAGGTAGGATCTTCTCCTCACGCTCCGCGTCTTGTATGATCCAGAGGGGACAC  
CGTCTCCTCCATGAGGCGCGCTTCCGCTTGGGGTGGCGGCTCCTCGCGCTGCGGTCCAGGTCCATGCGCATGAACA  
GATCAAACCTCCTCCTCGTGCCGGGCGATCATCTGGTTGACGGTCTCGTCTCGGGCACCTCGTCTTCTCCTCATCCTGCTCC  
TCGTGCTCCAGGATGGCTGCAGGAAGGCGCGCCGCTCATGGCTGGAGGACTTCTGGTGAACATCCCGGCCTGGATCACC  
TTCTGGTCCAGTGTACTTGGCTGCAGTGGCTTCTCCTCACGCTGTTGACGGTGCAGAGCCGAGCACAC  
GCACCTCGTTCTGCTGCCGATGCGGTGGGCTCGGTCTGCGCTTGCAGGTCTGGCGAGGATTCCAGTCTGTCAAAAAT  
GATCACAGTGTCTGCCGACTGGAGGTTACGGCCAGCCCCAGCCCGGGTGTGAGCAGGAAGATGAAGTACTCAGAGCC  
GGGCTCGTTGAAGGTTTTAGCAGCATGCCCGGCTCCTCCGCTTCTGTTCCATCAAGCCTGAGGATTTAAAGCCCGCAT  
ACGCAAGCAACTCTTCATGATGGTCAAGGAGGTCATTTGGCAGAACAGCAGCACTTTGTGGTGGTCTCGGATTTG  
GGAAGAATTCTATAAGAAGCTCAAATTTACCCGAGGCTCGGTACAGGTCAGCCCTTGGACAATGCCGCCAGTGAACCCCAA  
GTGCTCGGAAAAGGACTCCTCGATGTGCTGGAACATGCAGGGGTGGTGCAGATCTCCGACGCTGCATGATGGTGTTCATCA  
GGGTCTTGGTGGCGCTTTGCCCTTCTTCTCCTTCTCGGAGCCATCAGTCAGCAGCAGCCCTTGGCCTGCATGTGGCGGCA  
GAGCACTCGTGCAGCGCAGACATGTCGCACTTATGACGTACCGATCGCCCAAGTGAAGAAGTGAAGTTCAGCGCTGTCA  
GGATTGCGAGAGATGTGTGTTGATACTGTTGCACGTGTGTTTTCTATTAAGAAGACTCATCCGCTCCTCCATGCTGTGCTCATT  
CCTCCCCTTGACCTGCTGACACAGGGAGCAGCACCCCTTGGTCAATTTTGGGGGTTGGGTAAATTCTACTCGGTACAGAG  
CGCATGCTCCGTTTCTAGCTGCCTTTGCGCAGCGGCAGCCTGGACGCGT

**IRES-GFP-Lamin TC-donor plasmid, FBL, 240bp HAs**  
CTCGAGATATTTGCATGCTGCTATGTTCTGGAAATCACCATAAACGTGAAATGTCTTTGGATTTGGGAATCTTATAAGTTCTG  
TATGAGCCACTGCAGCGCTCCAGGCTGCCGCTGCGCAAAGGCAGCTAGAAACGGAGCATGCGCTCTGTGACCGAGTGAGAA  
TTTACCCAAACCCCGCAAATTTGACCAAGGGTGCCTGCTCCCTGTGTCAGCAGGTCAAGGGGAGGATGAGCAGCAGACATGG  
GAGACGGATGAGTCTTTAATAGAAAAACACACGTGCAACAGTATCAACACACATCTCTCGCAATCCTGACAGCGCTGAACTTC  
AGTTCTTACCTTTGGCGATCGGTACGTCAATCAAGTGCAGATGTCTGCGCTGCAGCGAGTGTCTGCCGCCACATGCAGGC  
CAAGGGCGTGTGCTGACTGATGGCTCCGAGAAGGACAAAGGGCAAGAGGGCGGACCAAGACCCCTGATGAACACCATCAT  
GCAGCTGCGGAAGATCTGCAACCACCCCTGCATGTTCCAGCACATCGAGGAGTCTTTTCCGAGCACTTGGGGTTCACTGGC  
GGCATTGTCCAAGGGGTGGACCTGTACCGAGCCTCGGGTAAATTTGAGCTTCTTGTAGATAATTCTTCCAAACTCCGAGCAACC  
AACCACAAAGTGTGCTGTTCTGCCAAATGACCTCCCTCATGACCATCATGGAAGATTGCTTTGCGTATCGCGGCTTTAAATACC  
TCAGGCTTGTATGAAACCAAGGCGAGGACCGGGGATGCTGCTGAAACCTTCAACGAGCCCGGCTGAGTACTTCTCAT  
CTTCTGCTCAGCACCCGGGCTGGGGGGCTCGGCCTGAACCTCCAGTCCGCGACACTGTGATCATTTTTGACAGCGACTGG  
AATCCTCGCCAGGACCTGCAAGCGCAGGACCGAGCCACCGCATCGGGCAGCAGAACGAGGTGCGTGTGCTCCGCCTCTGC  
ACCGTCAACAGCGTGGAGGAGAAGATCTAGCTGCAGCCAAGTACAAGCTCAACGTGGACCAGAAGGTGATCCAGGGCCGGCA  
TGTTTCAGCCAGAAGTCTCAGCCATGAGCGGCGCGCTTCTGTCAGGCCATCCTGGAGCAGGAGGAGCAGGATGAGGAGG  
AAGACGAGGTGCCGACGACGACCGTCAACAGATGATGCTCCCGGACGAGGAGGAGTGTGATCTGTTCACTGCGATGGA  
CCTGGACCGCAGGCGCAGGAGGCGCCGCAACCCCAAGCGGAAGCCGCGCCTCATGGAGGAGGACGAGCTCCCCTCGTGA  
TCATCAAGGACGACGCGGAGGTGGAGCGGCTGACCTGTGAGGAGGAGGAGGAGAAGATGTTCCGGCCTGGCTCCCGCCAC  
CGCAAGGAGGTGGACTGCAGGACTCACTGACGGAGAAGCAGTGGCTCAAGGCCATCGAGGAGGGCAGCTGGAGGAGAT  
CGAAGAGGAGTCCGCGAGAAGAAATCATCAGGAAGCGCAAGCGAGACGACGACGCGCGGCTCCTCACCCCGACCAACAG  
CACCCGAGCCGCGACAAGGACGACGAGAGCAAGAAGCAGAAGAAGCGACCACAGCTAAATCTCCATATGGAACAGAAACCC  
TGGTAAAGGACTGAAGCACTGACTGCCAAGCACAGGAGTGGCTGCATACCGGTCTTGTACAGCTCGTCCATGCCGAGAGTGT  
CCCGGGCGGGTACGAACTCCAGCAGGACCATGTATCGCGCTTCTCGTTGGGGTCTTTGCTCAGGGCGGACTGGGTGCT  
CAGGTAGTGGTTGTCGGGCAGCAGCACGCGGGCCGTCGCCGATGGGGTGTCTGCTGGTAGTGGTCCGCCGAGCTGCACGC  
TGCCGCTCCTCGATGTTGTGGCGGATCTTGAAGTTCACCTTGTGCGGTTCTTCTGCTTGTGCGCCATGATATAGACGTTGTGGC  
TGTTGTAGTTGACTCCAGCTTGTGCCCCAGGATGTTGCCGTCCTCCTTGAAGTCGATGCCCTTACGCTCGATGCGGTTACC  
AGGGTGTGCGCCCTGAACTTCACTCGGCGCGGGTCTTGTAGTGGCGTCTTGAAGAAGATGGTGGCTCCTGGACGT  
AGCCTTCCGGGATGCGGACTTGAAGAAGTCTGCTGCTTATGTTGGTGGGGTAGCGGCTGAAGCACTGCACGCGTACGCTAGGT  
CAGGGTGGTACAGGAGTGGGCCAGGGCAGGGCAGCTTCCGGTGGTGCAGATGAACTTCAAGGTCAGCTTGGCTTTCCAC  
TGGCATCGCCCTCGCCCTCGCCGGACACGCTGAACCTTGTGGCCGTTTACGTCGCCGTCAGCTCGACCAGGATGGGCACCA  
CCCCGGTGAACAGCTCCTCGCCCTTGTACGATGAGGTGACCATTTGTGGCCATATTATCATCGTGTTTTTCAAAGGAAAAC  
AGTCCCCGTGGTTCGGGGGGCTAGACGTTTTTTAACCTCGACTAAACATGTAAGCATGTGTACCGAGGGCCCAAGT  
AGATCCCATAACAATGGGGTACTTCTGGGATCCTTTCAGCCCTTGTGTAATACGCTTGAAGGAGAGCCATTTGACTCTTTCCAC  
AACTATCCAACCTACAACGTGGCACTGGGGTGTGCCGCTTTCAGGTTGATCTTATACAGTGGCTTTTGGCCGAGAGGC  
ACCTGTGCGCCAGGTGGGGGGTCCGCTGCCTGCAAAGGGTGCCTACAGACGTTGTTGTCTTCAAGAAGCTTCCAGAGGAAC  
TGCTTCTTACAGACATTAACAGACCTTGCATTCTTTGGCGAGAGGGGAAAGACCCCTAGGAATGCTCGTCAAGAAGACAG  
GGCCAGGTTTCCGGGCCCTCACATTGCCAAAAGACGGCAATATGGTGGAAAATAACATATAGACAAAACGCACACCCGGCTTATT



CCAAGCGGCTTCGGCCAGTAACGTTGGGTGGCCTGTGAGAGGAAGATAGGTGATGAAGGAGGGTCTACTACCCCAGGATCAT  
GGCACTCGGGGTGCAAGGGACAGAGATGTCTGTCTTGGTGTATTGCTGGGCCCTGCTCACCTGTACACTCCCACGACCAGC  
GCATGGTCTCTTTTATATGGCTCAAGGGTCAACTGCTCCTCGCGCTTCATGTTCTCTGTTGCATCTTCTCGAGCTCAAGCTTC  
CACCGCAAATGCTTCTGAGATCTATATTCGGCCAAGAAAAGCAGCAGCATCAGCCGTGCCTCCAGGTGCAATCTTCAAATTCAC  
GAGCATCAGCCGTGCGGATCTATATTCGGCCAAGAAAAGCAGCAGCATCAGCCGTGCCTCCAGGTGCAATCTTCAAATTCACAG  
AGCATCAGCCGTGCGGATCAATATGTAAGTAAGTAAGCGTTTTTTTTGTGACGGTACCGCCGGCCATGGTCCCAGCCTCCTCG  
CTGGCGGCCGGTGGGCAACATTCCGAGGGGGACCGTCCCCTCGGTAATGGCGAATGGGACACCGCT

**IRES-EGFP-Lamin HR-donor plasmid, GAPDH, 500bp HAS**

CTCGAGGGGCTGTGGGCAAGGTATCCCTGAGCTGAACGGGAAGCTCACTGGCATGGCCTTCCGTGTCCCCACTGCCAACGT  
GTCAGTGGTGGACCTGACCTGCCGTCTAGAAAAACCTGCCAAATATGATGACATCAAGAAGGTGGTGAAGCAGGCGTCCGGAG  
GGCCCCCTCAAGGGCATCCTGGGCTACACTGAGCACCAGGTGGTCTCCTCTGACTTCAACAGCGACACCCACTCCTCCACT  
TTGACGCTGGGGTGGCATTGCCCTCAACGACCATTGTCAAGTCAATTTCTGGTATGTGGCTGGGCCAGAGACTGGCTC  
TTAAAAAGTGCAGGGTCTGGCGCCCTCTGGTGGCTGGCTCAGAAAAAGGGCCCTGACAACCTTTTTTATCTTCTAGGTATGAC  
AACGAATTTGGCTACAGCAACAGGGTGGTGGACCTCATGGCCACATGGCCTCCAAGGAGTAAGACCCCTGGACCACAGCC  
CCAGCAAGAGCACTAATTTAATATAGTGAAGTAAATTTCCCTCTCCCTCCCCCCCCCTAACGTTACTGGCCGAAGCCGCTTGG  
AATAAGCCGGTGCCTGTATATGTTATTTCCACCATTGCGCTTTTTGGCAATGTGAGGGCCCGGAAACCTGGCCG  
TGCTTTCTTGACGAGCATTCCTAGGGGTCTTTCCCTCTCGCCAAAGGAATGCAAGGTCTGTTGAATGTCGTGAAGGAAGCAG  
TTCTCTGGAAGCTTCTTGAAGACAACAACGTCTGTAGCGACCTTTGCAGGCAGCGGAACCCCCACCTGGCGACAGGTG  
CCTCTGCGGCCAAAAGCCACGTGTATAAGATACACCTGCAAAGGGCGGCACAACCCCACTGCCACGTTGTGAGTTGGATGTTG  
TGGAAAGAGTCAAATGGCTCCTCAAGCGTATTCAACAAGGGGCTGAAGGATGCCAGAAGTACCCCACTGTATGGGATCT  
GATCTGGGGCCTCGGTGCATGCTTTACATGTTTGTAGTCGAGGTTAAAAAAAACGCTTAGGCCCCCGAACCCAGGGGACGT  
GGTTTTCTTTGAAAACACGATGATAATATGGCCACAATGGTGCACCTCATCGTGAAGGGCGAGGAGCTGTTACCCGGG  
GTGGTGCACCTCCTGGTGCAGCTGGACGGCGACGTAACCGGCCACAAGTTCAGCGTGTCCGGCGAGGGCGAGGGCGATGC  
CACCTACGGCAAGCTGACCTGAAGTTCATCTGCACCACCGGCAAGCTGCCCGTGCCTGGCCACCCTCGTGACCACCCTG  
ACCTACGGCGTGCAGTCTCAGCCGCTACCCCGACCATGAAGCAGCAGCACTTCTTCAAGTCCGCCATGCCCGGACCTG  
ACGTCCAGGAGCGCACCATCTTCTTCAAGGACGACGGCAACTACAAGACCCGCGCGGAGGTGAAGTTCGAGGGCGACACCC  
TGGTGAACCGCATCGAGCTGAAGGGCATCGACTTCAAGGAGGACGGCAACATCCTGGGGCACAAGCTGGAGTACAACACTCAA  
CAGCCACAACGTCTATATCATGGCCGACAAGCAGAAGAACGGCATCAAGTGAACCTCAAGATCCGCCACAACATCGAGGACG  
GCAGCGTGCAGCTCGCCGACCACTACCAGCAGAACACCCCACTCGGCGACGGCCCGTGTCTGCTGCCGACAACCACTACC  
TGAGCACCCAGTCCGCCCTGAGCAAAAGACCCCAACGAGAAAGCGCGATCACATGGTCTGCTGGAGTTCGTGACCCGCCG  
GGATCACTCTCGGCATGGACGAGCTGTACAAGATGCAGCCACTCCTGTGCTTGGCAGTCAGTGTCTTCACTCCTTACCAGGGT  
TTCTGTTCCATATGGAGATTTAGCTGTGGTTTTGGTATTCACTGTATGTCATATCCCTTCCACCTGCCCTGCATGGTGGTGT  
GCTTGGCGGTTGCCCTAGGAATAGCAAGCGCTAGGTAGGCGAGAAAGCTGATTAGAAAACAGATGGTGTGGGAACCTAAGC  
AACCATATTTTCTATAGCTCTGAGACATACAGCAAGTGGTGATGGTCCCTTCTCCATGTGAAGTGTAAAGCGTTTTATTCC  
CAAACCTATAAAGGAGTTAATGTAGTTTTCACTCTGTCCCATCCCTAAGGTAAGTGTCTTTGGCTGAAAACCACTTACCCTAGAG  
CTAGAAAACCTTTGGGGACAATAAGAAGGTTGTGACCTTTCTAGTATATGCCAAATACAAGATTTTTTTTTCTTTTTAGTATGAAATAC  
TTTTCAACAACCGCATGTTTTGTTGATGGATTCAAAAACCTAGGACCATTTGGTATCTGTCTTCAGAAAAGTTTTTACGTCTGATATC  
CTTGTGGTAAACCGCTTTTTCTAGGGGTATCATATCATCCATTTAAAAAGAAATGCAAACCTGCAGATTATAGAGTCCGACACACA  
TATATATAATGGGGTGGATAGTTTATAGTGTGCTCATTGCTGCTTTGTATTATTAGTGTGAGAGTTCCTGTGCTGTGTGGAATTC  
AACACTAATCTGCTGTAGTATGGAGCTGGGTATGTGGAACATTTGCAGGGAAAGTTGTTTCTCCGCTTGTTTTTCCAGGGGTAT  
TCGAGATGACATTGAAGAGGAAGATGACCAAGTGAAGTTCCTATGCAGTATTTCTATCTTTTATTTTTTACCAAAGTCTATACTGG  
GGACAAGCTAGAGCTTGCCTTCACTCAAATGGCCATTCTGACATTCAGCAGGGAATGTCATTTGATTTGCTCCTTTTGTACCT  
GTGTGACCAATTGGTAATACATAGATTACATGGCTTTCCCCATATTGAAGATGGAATTTTTGATCAACTGTGACATCCAAAGCA  
AATACGAGCTTTATTAGCTTGTCTTTTTAAATCCAAATTAATGTTTATTCTGATAAATCAAGTGGTAGAGTAGTGTGGATCTA  
TTGATGGCCTCTGGTAACATCTAACCTCTGTCTCTTAGTAAGTGTCTGTTTGTGGTCTTGTATTTCAAGCTGGAACATTAATTA  
CTGTCCATTAGTCTCTTTTTCCCATTTGTTGAGTGTGGATGATGAGATGAGTGGTAGCCGCCGCTGACGATCGAA  
GAGGAAGGAGAGACCCCTACTGCTGGGAGTCCCTGCCACACTCAGTCCCCCAACCACTGAATCTCCCTCCATCACAGTT  
GCCATGTAGACCCCTTGAAGAGGGGAGGGGCCTAGGGAGCCGACCTTGTGATGACCATCAATAAAGTACCCTGTGCTCAAC  
CAGTTACTTGTCTGTCTTATTCTAGGGTCTGGGGCAGAGGGGAGGGAAGCTGGGCTTGTGTCAAGGTGAGACATTCTTGCTG  
GGGAGGGACCTGGTATGTTCTCCTCAGACTGAGGGTAGGGCTCAAACAAGCCTTGTGCTTGGAGAACCATTTGCTTCCCG  
CTCAGACGTCCTGAGTGTACAGGAAGCTGGCACCACTACTTCAGAGAACCAAGGCCTTTTCTCTCCTCGCTCCAGCTCAGG  
CTATCTGCTGTTGGCCAACATGGAAGAAGCTATTCTGTGGGCAGCCCCAGGGAGGCTGACAGGTGGAGGAAGTCAGGGCTC  
GCACGCGT

**10 kb KO HR-donor plasmid, CDC42, 500bp HAS**

CTCGAGCCGTGTGATCGTGTGGTCTGCTGCTTGTGGTGCAGAGCCTGAGTAAGGCTGAATAAGGCTGGATCATGAACCAT  
TCTTTAAAGCAGTGGCCTTTGATTGCAAGTCTAGTTGACATACATGCATACATACAGGTGTGTGTGCACGTGTAACCTGAAGAACA  
GCTTTCACAAAATAATATTTAGCACACTGTGGAATTTTCTCTGATACAGCCTCTTCTCTTTTATGATAAAAAATAAATTCGCTGATTAT  
CACACCCTTTGGACCTTTTAAAAATAACACTTAAGAAGTTGGAATAGCCAGGGATCAGAAACTTAGAAATGGACCTTATTTGTTA  
TTGTAACCTATAGCAAGTCAATGTGCTCTTATGGGTTCTTTTAGCCATAATAATTGTGCTAGTTCTTTTCTGCTGTGAGTGCCT  
GAACCTGTTGCTAAGTGAAGGAGAAAATCCATATGTAAGTATAAATAAACAATGCTTTAATCTTTTTCAGGTCATCACAGAT  
TTGAAATATTTTACTCCTTCTTCTTTTATATTTTACTGCCAGAGTGGTTCCTAGATGTGCAGAAAAGAAATTGCAGTGGAAATTT  
TAACCTTTTATGTGGCATTCTACTTTGTAATGATGTAGAAAAGAGGAAGGCTTTTTAACTTTTGTGCTTTTAAAGAATTTACTGCT  
GTTTCTGATTTATTTTGTGCTAATGTGACATGTGGTACCAGTCTGCTGGGATGTGATGGGGGAGGGTGGAGGTGGGA  
ACACTGGGGTGGTGGGTTGGCACTTACAATTGGAGCTGTGTTCTGGACTTTTAGGACATATTTACTGGGATCAACTCAACT  
ATCAAATAAAGAACATGTGAAACAACCTTGGGTGGTAAACTTGTGGCTTCAAGTTTGGTATTAGGTGATTTAGGTGAGTCTGTAGACCT  
GGGTCTAAGTACCACCAATGCTGAGTCACTGTGATGTTGGAGTTTCTGGCTGAGGTGTAAGTGTATTCTGTATCTTAATCC  
CCGACCGCT

**10 kb KO TC-donor plasmid, CDC42, 500bp HAs**

CTCGAGACTAGTCGTTACATAAATTACGGTAAATGGCCCCGCTGGCTGACCGCCCAACGACCCCCGCCATTGACGTCAATAAT  
GACGTATGTTCCCATAGTAACGCCAATAGGGACTTTCCATTGACGTCAATGGGTGGAGTATTTACGGTAAACTGCCCACTTGGCA  
GTACATCAAGTGATCATATGCCAAGTACGCCCTTATTGACGTCAATGACGGTAAATGGCCCCGCTGGCATTATGCCAGTACA  
TGACCTTATGGGACTTTCTACTTGGCAGTACATCTACGTATTAGTCATCGCTATTACCATGGTGATGCGGTTTTGGCAGTACATC  
AATGGGCGTGGATAGCGGTTTACTCACGGGATTTCCAAGTCTCCACCCCAATTGACGTCAATGGGAGTTTGTGGCCACCA  
AAATCAACGGGACTTTCCAAAATGTCGTAACAACCTCCGCCCAATTGACGCAAATGGCGGTTAGGCGTGTACGGTGGGAGGTCT  
ATATAAGCAGAGCTGGTTTAGTGAACCGTCAGATCCGCTAGCGCGTCTGCCCTGGATGAGTCCGTGAGGACGAAACGGTACTC  
GGTACCCTCGGCAGACGCGTCGGGGATTAAGATACAGAAATACACTTACACCTCAGCCAGAAACTCCAACATGACAGTGTGAC  
TCAGCATTGGTGGTACTTAGGACCCAGGTCTACAGACTCACCTAAAATCACCTAAATCTGAAGCCACAAGTTTACCACCCAAGG  
TTGTTTACATGTTCTTTAGTTTGTATGATGATTTGATCCCAAGTAAATATGCTCTAAAAGTCCCAGAACACAGCTCCAATTGTAAGT  
CCAACCCAGACACCCCAAGTGTCCACCTCCACCTGCCCCATCCATGACATCCCACAGGACTGGTACCCACATGTAC  
ATTAGACACAAAATAAATCAGAAACAGCAAAATTTCTTTAAAAGCAGCAAAAAGTAAAAGCCTTCTCTTCTACATCATTTACA  
AAGTAGAAATGCCACATAAAAGTAAAATCCACTGCAATTTCTGACATCTAGGAACCAACTCTGGCAGTAAAATATAAAAG  
GAAGGAAGGAGTACAAAATTTCAAATCTGATGATGACCTGCAAAAAGATTAAGACATTTGTTTATTATACTTACATATGGATTT  
TTCTTCTCACTTAGCAACAGGTTCCAGGCACTCAGCAAGAAAAGAACTAGCACAATTTATGGTAAAAGAACCCCAATAAGA  
GACACAATGACTTGTATAAGTTACAATAACAATAAGGTCATTTCTTAAGTTTCTGATCCCTGGCTATTCCAACCTCTTAAGTGT  
ATTTTTAAAAGGTCCAAAGTGGTGTGATAATCAGCGAATTTATTTTTATCATGAAAGAGAAGAGGCTGTATCAGAGAAAATCCAC  
AGTGTGCTAAATATTTTTGTGAAAGCTGTTCTTCAAGTTACACGTGCACACACACCTGTATGTATGCATGTATGCAACTAGACT  
GCAATACAAAGGCCACTGCTTAAAGAATGGTTCATGATCCAGCCTTATTGACGCTTACTCAGGCTCTGACCAACAAGCAGCAG  
AGCACACAGATCACGCGCTCAGCTCAAGCTTCCACCGCAAATGCTTCTGAGATCTATATTCGGCCAAAGAAAGCAGCAGC  
ATCAGCCGTGCCTCCAGGTGCAATCTTCAAATGCACGAGCATCAGCCGTGCGGATCTATATTCGGCCAAAGAAAGCAGCAGCAT  
CAGCCGTGCCTCCAGGTGCAATCTTCAAATGCACGAGCATCAGCCGTGCGGATCAATATGTAAGTAAGTAAGCGTTTTTTTTGT  
CTGCGGTACCCGCGCCATGGTCCCAGCCTCTCGCTGCGCGCCGGTGGGCAACATTCCGAGGGGGACCGTCCCCTCGGTA  
ATGGCGAATGGGACGCGCGCGACGCGT

**8 kb KO and I-SceI Replacement HR-donor plasmid, CDC42, 500bp HAs**

CTCGAGCAGGTGTGTGTCACGTGTAAGAACAGCTTTCACAAAATAATTTAGCACACTGTGGAATTTCTCTGATACA  
GCCTCTTCTCTTTTATGATAAAAATAAATTCGCTGATTATCACACCCTTTGGACCTTTTAAAATAACACTTAAGAAGTTGGAATA  
GCCAGGGATCAGAACTTAGAAATGGACCTTATTTGTTATTGTAACCTTATAGCAAGTCATTGTGCTCTTATTGGGTTCTTTAGCC  
ATAATAATGTGCTAGTTCTTTTCTGCTGAGTGCCTGACCTGTTGCTAAGTGAGGAAGAAAATCCATATGTAAGTATAAATA  
AACAAATGCTTTAATCTTTTGCAGGTCTCATCAGATTTGAAATATTTAAAGTGGATACAAAATTTTTCAGCAATGCAGACAAT  
AAGTGTGTTGTTGGGCGATGGTGTGTTGGTAAACATGTCTCCTGATATCTACACAACAAAACAATTTTAGGGATAACAGG  
GTAATACAGATGATTTCTAGTCTGTTTTTTCAGTGGTCTCTCCATCTTCAATTTGAAAACGTGAAAGAAAAGTAAAGCTGATCAGAT  
ACTCTTGGCCCTAAGAAGTATCATCAGAAATTTCTACTGACCTGTTATAAATAGCATTAGAGGCTTGTGATTAACAAAAGGTGATTT  
TAAAATACCTTTTTTAGTGGGTGCCTGAGATAACTCACACTGTTCCAAAGACTCCTTTTCTGCTTTTGGGACTCAAATGATCT  
CAGAGATGACCCCTACTATTGAGAACTTCCAAGAACAACAGAAGCCTATCACTCCAGAGACTGCTGAAAAGCTGGCC  
GTGACCTGAAGGCTGTCAAGTATGTGGAGTGTCTGCACCTACACAGGTAAGAATGGCATGAAACCCCATGTGATTTATGGTC  
GAGTCATTTATTAGAGCATTAGGATACAGGAGTTATTTCTAACAGTGTACGACAGTGTCTCAAAGATGCCAGCAAGACGCGT

**8 kb KO and I-SceI Replacement TC-donor plasmid, CDC42, 500bp HAs**

CTCGAGCGTTACATAAATTACGGTAAATGGCCCCGCTGGCTGACCGCCCAACGACCCCCGCCATTGACGTCAATAATGACGT  
ATGTTCCCATAGTAACGCCAATAGGGACTTTCCATTGACGTCAATGGGTGGAGTATTTACGGTAAACTGCCCACTTGGCAGTACA  
TCAAGTGTATCATATGCCAAGTACGCCCTTATTGACGTCAATGACGGTAAATGGCCCCGCTGGCATTATGCCAGTACATGACC  
TTATGGGACTTTCTACTTGGCAGTACATCTACGTATTAGTCATCGCTATTACCATGGTGATGCGGTTTTGGCAGTACATCAATGG  
CGTGGATAGCGGTTTACTCACGGGATTTCCAAGTCTCCACCCCAATTGACGTCAATGGGAGTTTGTGGGACTCAAATGATCT  
ACGGGACTTTCCAAAATGTCGTAACAACCTCCGCCCAATTGACGCAAATGGCGGTTAGGCGTGTACGGTGGGAGGTCTATATAA  
GCAGAGCTGGTTTACTGAAACCGTCAGATCCGCTAGCGCGTCTGCCCTGGATGAGTCCGTGAGGACGAAACGGTACTCGGTAC  
CGTCCGACAGCGCTTGTCTGGGCATCTTTGAGCACTGCTGATCAGTGTGAGAAATAACTCCTGTATCCTAATGCTCTAATAAA  
TGACTCGACATAAATACATAGGGTTTTCATGCCCTTACTCTGCTGTAAGTGCAGAACTCCACATCTTACAGCCTTTCAG  
GTCACGGGCCAGCTTTTTCAGCAGTCTCTGGAGTATAGGCTTCTGTTTGTCTTGGCAAGTTTCTCAATAGTAGAGGGTCTATC  
TCTGAGATCAATTTGAGTCCCAACAAGCAAGAAAGGAGTCTTTGGACAGTGGTGAGTTATCTCAGGCACCCACTAAAAAAGGT  
ATTTTAAAATACACCTTTGTTAATCAACAAGCCTTAATGCTATTTATAACAGGTGAGTAAATTTCTGAGATGATCTTCTAGGGC  
AAGAGTATCTGATCAGCTTACCTTTTCTTCCAGTCTTCAAATGAAGTGGAGAGACCACTGAAAACAGACTAGAAATACATCTG  
TATTACCTGTTATCCCTAAAATTTGTTTGTGTTAGGATACAGGAGACATGTTTACCAACAGCACCATCGCCACAACAACA  
CACTAATTTGCTGCAATGCTGAAATAGTTTTGTATCCACTTAAATATTTCAAATCTGATGATGACCTGCAAAAAGATTAAGACAT  
TTGTTTATTTATACTTACATATGGATTTTTCTTCTCACTTAGCAACAGGTTCCAGGCACTCAGAGCAAGAAAAGAACTAGCACAAT  
ATTATGGCTAAAAGAACCAATAAGAGACACAATGACTTGTATAAGTTACAATAACAATAAGGTCATTTCTAAGTTTCTGATCC  
CTGGCTATTTCCAACTTCTAAGTGTATTTTTAAAAGGTCCAAAGTGGTGTGATAATCAGCGAATTTATTTTTATCATGAAAGAGAA  
GAGGCTGTATCAGAGAAAATCCACAGTGTGCTAAATATTTTGTGAAAGCTGTTCTTCAAGTTACACGTGCACACACACCTGC  
TCGAGCTCAAGCTTCCACCGCAAATGCTTCTGAGATCTATATTCGGCCAAAGAAAGCAGGACATCAGCCGTGCCTCCAGGTG  
AATCTTCAAATGACAGGATCAGCCGTGCGGATCTATATTCGGCCAAAGAAAGCAGGACATCAGCCGTGCCTCCAGGTGCA  
ATCTTCAAATGACAGGATCAGCCGTGCGGATCAATATGTAAGTAAAGCAGTGTGTTTTTTTGTGCGACCGTACCAGGCTCATG  
GTCCAGCCTCTCGCTGGCGGCCGGTGGGCAACATTCCGAGGGGGACCGTCCCCTCGGTAATGGCGAATGGGACACGCGT

**8 kb IRES-GFP Replacement TC-donor plasmid, CDC42, 500bp HAs**

CTCGAGCGTTACATAAATTACGGTAAATGGCCCCGCTGGCTGACCGCCCAACGACCCCCGCCATTGACGTCAATAATGACGT  
ATGTTCCCATAGTAACGCCAATAGGGACTTTCCATTGACGTCAATGGGTGGAGTATTTACGGTAAACTGCCCACTTGGCAGTACA  
TCAAGTGTATCATATGCCAAGTACGCCCTTATTGACGTCAATGACGGTAAATGGCCCCGCTGGCATTATGCCAGTACATGACC  
TTATGGGACTTTCTACTTGGCAGTACATCTACGTATTAGTCATCGCTATTACCATGGTGATGCGGTTTTGGCAGTACATCAATGG  
CGTGGATAGCGGTTTACTCACGGGATTTCCAAGTCTCCACCCCAATTGACGTCAATGGGAGTTTGTGGTGGCACCAAAATCA  
ACGGGACTTTCCAAAATGTCGTAACAACCTCCGCCCAATTGACGCAAATGGCGGTTAGGCGTGTACGGTGGGAGGTCTATATAA

GCAGAGCTGGTTTAGTGAACCGTCAGATCCGCTAGCGCGTCTGCCCTGGATGAGTCCGTGAGGACGAAACGGTACTCGGTAC  
CGTCGGCAGACGCGTACTGTTAGAAATAACTCCTGTATCCTAATGCTCTAATAAATGACTCGACCATAAATACACATGGGGTTTCA  
TGCCATTTACCTGTGTAAGTGCAGAACACTCCACATACTTGACAGCCTTCAGGTCACGGGCCAGCTTTTTCAGCAGTCTCTGG  
AGTGATAGGCTTCTGTTTGGCAAGTTTCTGGCAAGTTTCTCAATAGTAGAGGGGTCTCTCTGAGATCAATTTGAGTCCCAACAAGCAAG  
AAAGGAGTCTTTGGACAGTGGTGAGTTATCTCAGGCACCCACTAAAAAAGGATTTTAAAAATACACCTTTGTTAATCAACAAGC  
CTCTAATGCTATTATAACAGGTCAGTAGAAATTCTGAGATGATCTTCTAGGGCAAGAGTATCTGATCAGCTTACCTTTTCTTTCA  
CGTTTTCAAATGAAGATGGAGAGACCACTGAAAAACAGACTAGAAATACATCTGTATTACCCTGTTATCTACTTGTACAGCTCGTC  
CATGCCGAGAGTGATCCCGGGCGGGTACGAACTCCAGCAGGACCATGTGATCGCGCTTCTCGTTGGGGTCTTTGCTCAGG  
GCGGACTGGGTGCTCAGGTAGTGGTTGTCGGGCAGCAGCACGGGGCCGTCGCCGATGGGGGTGTTCTGCTGGTAGTGGTC  
GGCGAGCTGCACGCTGCCGCTCCTCGATGTTGTGGCGGATCTTGAAGTTCACCTTGATGCCGTTCTTCTGCTTGTGGCCATGA  
TATAGACGTTTGGCTGTTGTAGTTGACTCCAGCTTGTGCCCCAGGATGTTGCCGCTCCTCCTTGAAGTCGATGCCCTTACGCT  
CGATCGCGTTACCAGGGTGTCCGCTCGAACTCACCTCGGCGGGTCTTGTAGTTGCCGCTGTCCTTGAAGAAGATGGT  
GCCCTCCTGGACGTAGCTTCCGGGCATGGCGGACTTGAAGAAGCTGTGCTGCTTTCATGTGGTCCGGGTAGCGCTGAAGCA  
CTGCACGCCGTAGGTACGGGTGGTACGAGGGTGGCCAGGGCACGGGCAGCTTCCGGTGGTGCAGATGAACTTACGGG  
TCAGCTTGGCGTAGGTGGCATGCCCTCGCCCTCGCCGGACACGCTGAACTTGTGGCCGTTTACGTCGCCGCTCCAGCTCGAC  
CAGGATGGGCACCCCGGTGAACAGCTCCTCGCCCTTGTCTCAGCATGAGGTCGACCATTGTGCCATATTATCATCGTGT  
TTTCAAAGGAAAAACGTCCTCCGCTGGTTCCGGGGGCTAGACGTTTTTAACTCGACTAAACAGACCCCTAGGAATGCTC  
CGAGGCCCCAGATCAGATCCCATACAATGGGGTACCTTCTGGGCATCCTTACGCCCTTGTGAATACGCTTGGAGAGGCCA  
TTTGACTCTTTCCACAATATCCAACCTCACAACGTGGCACTGGGGTGTGCGCCCTTTCAGAGGTGATCTTATACACGTGGCTTT  
TGGCCCGAGAGGCACCTGTCCGAGGTGGGGGGTCCGCTGCCTGCAAAGGGTGCCTACAGACGTTGTTTGTCTTCAAGAA  
GCTTCCAGAGGAACTGCTTCCCTTACGACATTCACAGACCTTGCATTCTTTGGCGAGAGGGGAAAGCCCTAGGAATGCT  
CGTCAAGAAGACAGGGCCAGTTCGGGGCCCTCACATTGCCAAAAGACGGCAATATGGTGGAAAATAACATATAGACAAACG  
CACACCGGCCCTTATTCCAAGCGGCTTCGGCCAGTAACGTTAGGGGGGGGGAGGGAGAGGGGCCATAAAATTTGTTTGTG  
TAGGATACGAGGACATGTTTTACCAACAGCACCATCGCCACAACAACACTTAATTGTCTGCATTGCTGAAATAGTTTTGTA  
TCCACTTTAAATATTTCAAATCTGATGATGACCTGCAAAAAGATTAAGACATTTGTTATTATACTACATATGGATTTTCTCCT  
CACTTAGCAACAGGTTTACGGCACTCAGAGCAAGAAAAGAACTAGCACAATTTATTATGGCTAAAAGAACCAATAAGACACAAT  
GACTTGTATAAGTTACAATAACAATAAGGTCCATTTCTAAGTTTCTGATCCCTGGCTATTCCAACCTTCTAAGTGTATTTTTAAA  
AGGTCCAAAGTGGTGTGATAATCAGCGAATTTATTTTATCATGAAAGAGAAGAGGCTGTATCAGAGAAAATCCACAGTGTGCT  
AAATATTATTTGTGAAAGCTGTTCTTCAGTTACACGTGCACACACCTGCTCGAGCTCAAGCTTCCACCGCAATGCTTCTGA  
GATCTATATTCCGGCCAAAGAAAGCACGAGCATCAGCCGTGCCTCCAGGTCGAATCTTCAAATTGCACGAGCATCAGCCGTGCGG  
ATCTATATTCCGGCCAAAGAAAGCACGAGCATCAGCCGTGCCTCCAGGTCGAATCTTCAAATTGCACGAGCATCAGCCGTGCGGAT  
CAATATGTAAGTAAGTAAAGCGTTTTTTTTGTGACGGTACCAGCCGGCCATGTTCCAGCCTCCTCGCTGGCGGCCGGTGGCA  
ACATTCGAGGGGGACCGTCCCCTCGGTAATGGCGAATGGGACACCGCT

**8 kb IRES-GFP Replacement HR-donor plasmid, CDC42, 500bp HAs**

CTCGAGCAGGTGTGTGCACGTGTAAGTGAAGAACAGCTTTTACAAAATAATTTAGCACACTGTGGAATTTCTCTGATACA  
GCCTCTTCTTTTTCATGATAAAAATAAATTCGCTGATTATCACACCCTTTGGACCTTTTAAAAATAACACTTAAGAAGTTGGAATA  
GCCAGGGATCAGAACTTAGAAATGGACCTTATTTGTTATTGTAACCTTATAGCAAGTCATTGTGTCTTATTGGGTTCTTTTAGCC  
ATAATAATTGTGCTAGTCTTTTCTTGTCTGAGTGCCTGAACCTGTTGCTAAGTGAGGAAGAAAAATCCATATGTAAGTATAATA  
AACAAATGCTTTTAACTTTTTCAGAGTCATCATCAGATTTGAAATATTTAAAGTGGATACAAAACCTTTTTCAGCAATGCAGCAAT  
AAGTGTGTTGTTGTTGGGCGATGGTGTCTGTTGGTAAACATGTCTCCTGATATCCTACACAACAACAATTTTAGGCCCTCTCC  
CTCCCCCCCCCTAACGTTACTGGCCGAAGCCGCTTGAATAAGGCCGGTGTGCGTTTGTCTATATGTTATTTCCACCATATTG  
CCGCTTTTTGGCAATGTGAGGGCCCGGAAACCTGGCCCTGTCTTCTTACGAGCATTCTAGGGGTCTTTCCCTCTCGCCAA  
AGGAATGCAAGTCTGTTGAATGTCGTGAAGGAAGCAGTTCCCTTGGAGCTTCTTGAAGACAACAACGCTGTGAGCGACCC  
TTTGCAGGCAGCGGAACCCCCACCTGGCGACAGGTGCCTCTGCGGCCAAAAGCCACGTGTATAAGATACACCTGCAAAGGC  
GGCACAACCCAGTGCCACGTTGTGAGTTGGATAGTTGTGAAAGAGTCAAATGGCTCTCCTCAAGCGTATTCAACAAGGGGC  
TGAAGGATGCCAGAAAGTACCCCATTTGATGGGATCTGATCTGGGGCCTCGGTGCACATGCTTTACATGTGTTAGTCGAGGT  
TAAAAAACGCTTAGGCCCCCCGAACCACGGGGACGTGGTTTTCTTTGAAAAACACGATGATAATGGCCACAATGGTGCAG  
CTCATCGTGAGCAAGGGCGAGGAGCTGTTACCCGGGGTGGTCCCATCCTGGTGCAGCTGGACGGCGACGTAAACGGCCAC  
AAGTTCAGCGTGTCCGGCAGGGCGAGGGCGATGCCACCTACGGCAAGCTGACCCTGAAGTTCATCTGCACCACCGGCAAG  
CTGCCCGTGCCTGGCCACCCCTCGTGACCACCTGACCTACGGCGTGCAGTGTTCAGCCGCTACCCCGACCACATGAAG  
CAGCAGACTTCTTCAAGTCCGCCATGCCGAAGGCTACGTCCAGGAGCGCACCATCTTCTTCAAGGACGACGGCAACTACAA  
GACCCGCGCCGAGGTGAAGTTCGAGGGCGACACCCCTGGTGAACCGCATCGAGCTGAAGGGCATCGACTTCAAGGAGGACGG  
CAACATCCTGGGGCACAAGCTGGAGTACAACACTACAACAGCCACAACGCTCTATATCATGGCCGACAAGCAGAAGAACGGCATCA  
AGGTGAACTTCAAGATCCGCCACAACATCGAGGACGGCAGCGTGCAGCTCGCCGACCACTACCAGCAGAACACCCCATCGG  
CGACGGCCCCGTGCTGCTGCCGACAACCACTACCTGAGCACCAGTCCGCCCTGAGCAAAGACCCCAACGAGAAGCGCGA  
TCACATGGTCTGCTGGAGTTCGTGACCGCCGCGGGATCACTCTCGGCATGGACGAGCTGTAACAAGTAGATAACAGGTAAT  
ACAGATGATTTCTAGTCTGTTTTTCAAGTGGTCTCTCCATCTTCAATTTGAAAACGTTGAAGAAAAGGTAAGCTGATCAGATACTCT  
TGCCCTAAGAAGATCATCTCAGAATTTCTACTGACCTGTTATAAATAGCATTAGAGGCTTGTGATTAAACAAAGGTGATTTTTAAA  
TACCTTTTTTTAGTGGGTGCCTGAGATAACTACAACACTTCCAAAGACTCCTTTCTTGTGTTGGGACTCAAATGATCTCAGA  
GATGACCCCTCTACTATTGAGAACTTGCCAAACAACAGAAAGCTATCACTCCAGAGACTGCTGAAAAGCTGCCCGTGCAG  
CTGAAGGCTGTCAAGTATGTGGAGTGTCTGCACTTACACAGTAAGAATGGCATGAAACCCCATGTTATTTAGTGGTGCAGTCT  
ATTTATTAGAGCATTAGGATACAGGAGTATTTCTAACAGTACCGCT

**Supplementary Table S3. Sequences of primers (5'→3') used in this study.**

| <b>Primers used for the cloning of HR and TC-donors</b> |                                       |
|---------------------------------------------------------|---------------------------------------|
| <i>H1-F</i>                                             | AATTCATATTTGCATGTCGCTATGTGTTT         |
| <i>H1-R</i>                                             | CGAGTGGTCTCATACAGAACTTATAAG           |
| <i>CMV-F</i>                                            | CGTTACATAACTTACGGTAAATGGCCC           |
| <i>CMV-R</i>                                            | AGCTCTGCTTATATAGACCTCCCACC            |
| <i>LMNA-HA-F1</i>                                       | CCCGGCGTCGGTGACTCAGT                  |
| <i>LMNA-HA-R1</i>                                       | GGACGGGGTCTCCATGGCCG                  |
| <i>LMNA-HA-F2</i>                                       | CAGCGGCGCGCCACCCCGC                   |
| <i>LMNA-HA-R2</i>                                       | GAGCTCGGCCTCGTAGGCC                   |
| <i>FBL-HA-F1</i>                                        | AAGATGCAACAGGAGAACATGAAGC             |
| <i>FBL-HA-R1</i>                                        | GGGTGGCCTGTGAGAGGAAGATAG              |
| <i>FBL-HA-F2</i>                                        | CCCAAGGTGAAGAAGTGAAGTTCAGCG           |
| <i>FBL-HA-R2</i>                                        | CCAGGCTGCCGCTGCGCAA                   |
| <i>GAPDH-HA-F1</i>                                      | CCATCACTGCCACCCAGAAGACT               |
| <i>GAPDH-HA-R1</i>                                      | ATGAGGTCGACGACCCTGTTG                 |
| <i>GAPDH-HA-F2</i>                                      | ACCACCAGCCCCAGCAAGAG                  |
| <i>GAPDH-HA-R2</i>                                      | GACTTCCTCCACCTGTCAGCCTC               |
| <i>GFP-F</i>                                            | GTGAGCAAGGGCGAGGAGC                   |
| <i>GFP-R</i>                                            | CTTGACAGCTCGTCCATGCCG                 |
| <i>CDC-HA-F1</i>                                        | CCGTGTGATCGTGTGGTGTCTGCTGC            |
| <i>CDC-HA-R1</i>                                        | AAATATTTCAAATCTGATGATGACCTGCAAAAAGATT |
| <i>CDC-HA-F2</i>                                        | TGTACTCCTTCCTTCCTTTTATATTTTACTGCC     |
| <i>CDC-HA-R2</i>                                        | CGGGGATTAAGATACAGAAATACACTTACACC      |
| <i>CDC-HA-F3</i>                                        | CAGGTGTGTGTGCACGTGTAAGT               |
| <i>CDC-HA-R3</i>                                        | AAATTTGTTTGTGTGTGAGGATATCAGGAGAC      |
| <i>CDC-HA-F4</i>                                        | ACAGATGTATTTCTAGTCTGTTTTTCAGTGGTC     |
| <i>CDC-HA-R4</i>                                        | ACTGTTAGAAATAACTCCTGTATCCTAATGCTC     |
| <i>IRES-F</i>                                           | TTTTAGGCCCTCCTCCCTCC                  |
| <i>IRES-R</i>                                           | CGACCATTGTGGCCATATTATCATCGTG          |
| <i>PM-HA-F</i>                                          | GTGCTTCAGCCGCTACCCCG                  |
| <i>PM-HA-R</i>                                          | CGACGCTGAGGTCAAGACCACC                |
| <b>Primers used in gRNA synthesis</b>                   |                                       |
| <i>LMNAg1-F</i>                                         | ACCGCCATGGAGACCCCGTCCCAG              |
| <i>LMNAg1-R</i>                                         | AAACCTGGGACGGGGTCTCCATGG              |
| <i>LMNAg2-F</i>                                         | ACCGGGGCGACAGCGGAGTGGAGC              |
| <i>LMNAg2-R</i>                                         | AAACGCTCCACTCCGCTGTGCGCC              |
| <i>gFBL-F</i>                                           | ACCGCTCTCACAGGCCACCCCCCA              |
| <i>gFBL-R</i>                                           | AAACTGGGGGGTGGCCTGTGAGAG              |
| <i>gGAPDH-F</i>                                         | ACCGAGCCCCAGCAAGAGCACAAG              |
| <i>gGAPDH-R</i>                                         | AAACCTTGTGCTCTTGTGTTGGGCT             |
| <i>CDCg1-F</i>                                          | ACCGCAGATTTGAAATATTTAAAG              |
| <i>CDCg1-R</i>                                          | AAACCTTTAAATATTTCAAATCTG              |
| <i>CDCg2-F</i>                                          | ACCGGAAGGAAGGAGTACAGAA                |
| <i>CDCg2-R</i>                                          | AAACTTCTGTACTCCTTCCTTCC               |
| <i>CDCg3-F</i>                                          | ACCGCACAACAAACAATTTCCAT               |
| <i>CDCg3-R</i>                                          | AAACATGGAAATTTGTTTGTGTTG              |
| <i>CDCg4-F</i>                                          | ACCGGACTAGAAATACATCTGTTTG             |
| <i>CDCg4-R</i>                                          | AAACCAACAGATGTATTTCTAGTC              |
| <b>Primers used in gRNA synthesis</b>                   |                                       |
| <i>gReporter-F</i>                                      | ACCGGCGCCTGCTCGCGATGCTAG              |
| <i>gReporter-R</i>                                      | AAACCTAGCATCGCGAGCAGGCGC              |
| <i>gPRNP-F</i>                                          | ACCGGCAGTGGTGGGGGGCCTTGG              |
| <i>gPRNP-R</i>                                          | AAACCAAGGCCCCACCCTG                   |

**Supplementary Table S3. Sequences of primers (5'→3') used in this study.**

| <b>Primers used in genotyping PCR</b>             |                              |
|---------------------------------------------------|------------------------------|
| <i>P1</i>                                         | GACCCTTTTGCCCACTCT           |
| <i>P2</i>                                         | AAACTCCTCACGCACTTTGCTCAG     |
| <i>P3</i>                                         | CCGGCGTCGGTGACTCAGTGTC       |
| <i>P4</i>                                         | GAGCTCGGCCTCGTAGGCGGCC       |
| <i>P5</i>                                         | GTGTGTGCACGTGTAAGTGAAGAACAGC |
| <i>P6</i>                                         | GCATACACTTCAGTTATTCAGCAATGTC |
| <i>P7</i>                                         | CGTGTGATCGTGTGGTGCTCTGC      |
| <i>P8</i>                                         | GGTTCATGATCCAGCCTTATTCAGC    |
| <i>P9</i>                                         | ATGACATCAAGAAGGTGGTGAAGCA    |
| <i>P10</i>                                        | GCCTTGTCTCTGAAGTAGTGGTGC     |
| <i>P11</i>                                        | GGTTCGCCGTCGCCATCGAGAAC      |
| <i>P12</i>                                        | GACTCCTTGAGAATCCGCCTGTC      |
| <i>P13</i>                                        | CTCCACAGCCTCAGCCGAGGCC       |
| <i>P14</i>                                        | GCATGCGCAGCGAGCTACCAATCC     |
| <i>GFP-N137-R</i>                                 | AACTTCAGGGTCAGCTTGCCGTA      |
| <i>GFP-C175-F</i>                                 | ACTACCAGCAGAACACCCCATC       |
| <i>mCherry-GFP-F</i>                              | GGACATCACCTCCCACAACGA        |
| <i>mCherry-GFP-R</i>                              | GTCGTCCTTGAAGAAGATGGTGC      |
| <i>PRNP-F</i>                                     | GAAGCCTGGAGGATGGAACACTG      |
| <i>PRNP-R</i>                                     | ACCGTGTGCTGCTTGATTGTGAT      |
| <b>Primers used in qPCR</b>                       |                              |
| <i>LMNA-F</i>                                     | GACTCAGTGTCGCGGGAGCG         |
| <i>LMNA-R</i>                                     | CGGTGAACAGCTCCTCGCCC         |
| <i>FBL-F</i>                                      | GCATTGACTCCACAGCCTCAGCC      |
| <i>FBL-R</i>                                      | CCCGGTGAACAGCTCCTCGC         |
| <i>EGFP-RT-F</i>                                  | TCCAGCAGGACCATGTGATC         |
| <i>EGFP-RT-R</i>                                  | AGTCCGCCCTGAGCAAAGA          |
| <i>GAPDH-RT-F</i>                                 | TGCACCACCAACTGCTTAGC         |
| <i>GAPDH-RT-R</i>                                 | GGCATGGACTGTGGTCATGAG        |
| <i>36B4-F</i>                                     | CAGCAAGTGGGAAGGTGTAATCC      |
| <i>36B4-R</i>                                     | CCCATTCTATCATCAACGGGTACAA    |
| <b>Primers used in Next-generation sequencing</b> |                              |
| <i>mCherry-GFP-F11</i>                            | GGACATCACCTCCCACAACGA        |
| <i>mCherry-GFP-R11</i>                            | GTCGTCCTTGAAGAAGATGGTGC      |
| <i>PRNP-F12</i>                                   | GGCAACCGTACCCACCTCA          |
| <i>PRNP-R12</i>                                   | GAAGTTCTCCCCCTTGGTGGTT       |
| <i>LMNA-ISCE-F13</i>                              | GCGTCGGTGACTCAGTGTTCC        |
| <i>LMNA-ISCE-R13</i>                              | CTCGTAGGCGGCCTTGATGC         |

**Supplementary Table S3. Sequences of primers (5'→3') used in this study.**

| <b>Primers used in LM-PCR</b>   |                                                                          |
|---------------------------------|--------------------------------------------------------------------------|
| <i>P15</i>                      | TCCAGCTCGACCAGGATG                                                       |
| <i>P16</i>                      | CCGGTGAACAGCTCCTCG                                                       |
| <b>NGS barcoding PCR primer</b> |                                                                          |
| <i>15</i>                       | AATGATACGGCGACCACCGAGATCTACACNNNNNNNACACTCTTCCCTAC<br>ACGACGCTCTTCCGATCT |
| <i>17</i>                       | CAAGCAGAAGACGGCATACGAGATNNNNNNNNGTGACTGGAGTTCAGACG<br>TGTGCTCTTCCGATC    |

**Supplementary Tables S4. On-target and off-target insertion sites of LM-PCR**

| LM-PCR results of GFP insertion at <i>LMNA</i> loci by CE <sub>d</sub> system |          |           |           |                                                                                                                                                                                                                                                                             |
|-------------------------------------------------------------------------------|----------|-----------|-----------|-----------------------------------------------------------------------------------------------------------------------------------------------------------------------------------------------------------------------------------------------------------------------------|
| Chr                                                                           | start    | gene      | frequency | Validation Seq                                                                                                                                                                                                                                                              |
| chr1                                                                          | 1.56E+08 | LMNA      | 587142    | CCGGTGAACAGCTCCTCGCCCTTGCTCACGGACGGGGTCTCCATGG<br>CCGGCAGGTTGGCAGCGCTGCCCGGGGCGAGGGTCCCGGAAAG<br>GGCGCGGGGCTCGGGTGAAGGACAGAGACTGCTCGGAGTCGGAG<br>TGCGCCGGCCGGCTGGCTCTCGGCTTGCTCCTGGCAGGCGTGGGG<br>ATCTGGGCCGGGCGCTGTCGGACCTCGGGATCTGGGTTGGCTGGT<br>GTAGGTGCGGCGCTCCCGGAACA  |
| chr14                                                                         | 20811578 | RAPP2     | 5         | CCGGTGAACAGCTCCTCGCCCTTGCTCACGGACGGGGTCTCCATGG<br>CGGATCCGAGTGGTCTCATACAGAACTTATAAGATTCCCAAATCCAA<br>AGACATTTACGTTTATGGTGATTTCCAGAACACATAGCGACATGCA<br>AATATTGCAGGGCGCCACTCCCCTGTCCTCACAGCCATCTTCTGCG<br>CAGGGCGCAGCGCGCTGGGTGTTCCGCGCTAGTGACACTGGGCC<br>CGCGATTCCCTTGGAGCG |
| chr20                                                                         | 30049696 | DEFB124   | 3         | CCGGTGAACAGCTCCTCGCCCTTGCTCACGGACCGAATAAGCCAG<br>AAAAATCCCTCCTTGAGCCAGTGCCTGAATGAGTGGGAGATGGGAAT<br>TGGATTATTTCTGGGCAGGGAAAGCTTCTGGCAGTGAAGACATCAC<br>ATTGCATTGTGTGATTCCACTGTGAAAGATACTTATTTTCCACAAA<br>AAAAATGGTGCTAAACATAACCAACCCTTCTTTAATGCACGGCCA<br>GAGAAATGTGATAT     |
| chr2                                                                          | 1.27E+08 | GYPC      | 3         | CCGGTGAACAGCTCCTCGCCCTTGCTCACGGACGGGGTCTCCATGG<br>CCGGCAGGTTGGCAGCGCTGCCCGGGGCGAGGGTCCCGGAAAG<br>GGCGCGGGGCTCGGGTGAAGGACAGAGACTGCTCGGAGTCGGAG<br>TGCGCCGGCCGGCTGGCTATATGGCTAACGTATAGAGAATATCATGC<br>ACTGAAACCCAACCTTCTCTTTGTAGTCTGGTCTGATGGTTATTCCC<br>CTGCTAATACCATAGCTTC  |
| chr17                                                                         | 3700587  | ITGAE     | 3         | CCGGTGAACAGCTCCTCGCCCTTGCTCACGGACGGGGTCTCCATGG<br>CCGGCAGGTTGGCAGCGCTGCCCGGGGCGAGGGTCCCGGAAAG<br>GGCGCGGGGCTCGGGTGAAGGACATGTAGCTGGGACTACAGGCA<br>CCCGCCACCATGCCAGCTAATTTTTGTGTTTTAGTAGAGACGGA<br>GTTTCACTGTGTAGCCAGGATGGTCTCGATCTCCTGACCTCATGAT<br>CTGCCACCTTGGCCTCTA       |
| chr1                                                                          | 1.11E+08 | KCNA3     | 3         | CCGGTGAACAGCTCCTCGCCCTTGCTCACGGACGGGGTCTCCATGG<br>CCGGCAGGTTGGCAGCGCTGCCCGGGGCGAGGGGCTGTTAGATT<br>ATGGTCCAATTTAATTTACATAATTTAATAGTATGCAGTGGTAC<br>AGTTCTTTGAAACAAAAAGGGTTAAAAATAAGAGTAACATTTTATTTA<br>AACATAATCATTCTGTTTCATATACATTATATAAATTATACATTATCTAC<br>AGTTGTTTTT      |
| chr13                                                                         | 91832047 | LINC00379 | 3         | CCGGTGAACAGCTCCTCGCCCTTGCTCACGGACACACTGACTAGTC<br>GGAGGAACGTTGTGCGATCTCACCAATGGTCAGTCCAAGTCGACT<br>CGTCAGTGTAAAAAAGCATTAAATCAAAGCACTTGATCAAATTTAT<br>TTAGAGCAATAATTTTATATTGATTTGTTTTGTGGAACTTAATAAAAA<br>TACGGTCTTTGCTATGTTTATTGGTGAACCTTTTACTTTAGCGGCATT<br>TTAAACATGTT    |
| chr5                                                                          | 1.61E+08 | LINC02159 | 3         | CCGGTGAACAGCTCCTCGCCCTTGCTCACGGACGGGGTCTCCATGG<br>CCGGCAGGTTGGCAGCGCTGCCCGGGGCGAGGGTCCCGGATCA<br>GGAAGCTGAGGCAGGAGAATTGCTTGAAGCCAGGAGGCAGAGATTG<br>CAATGAGCGGAGATCACGCCACTGCACTGCAGCCTGGGTGACAACA<br>GTGAAACTCGTTCTCAAACAAACAAAAAACAACACTGCCAGATTT<br>TTTTTAATTGTTAGGCAG    |
| chr12                                                                         | 65780874 | MSRB3     | 3         | CCGGTGAACAGCTCCTCGCCCTTGCTCACGGACGGGGTCTCCATGG<br>CCGGCAGGTTGGCAGCGCTGCCCGGGGCGAGGGTCCCGGAAAG<br>GGCGCGGGGCTCGGGTGAAGGACAGAGACTGCTCGGAGTCGGAG<br>TGCGCCGGCCGGCTGGCTCTCATGAGATACTGCTGTTGACTGTAAT<br>CCTGTCAACCATTAGCTCTACAATAGCCTTACATAAATAAACTCAGAA<br>TTGAAATAATGAGATAAGA  |
| chr11                                                                         | 64834438 | NAALADL1  | 3         | CCGGTGAACAGCTCCTCGCCCTTGCTCACGGACGGGGTCTCCATGG<br>CCGGCAGGTTGGCAGCGCTGCCCGGGGCGAGGGTCCCGGAAAG<br>GGCGCGGGGTCAGTCCAAGTCGACTCGTCACTGTACCTGGTCTCA<br>TAGCCACCTGGGACCAGTGTTTCAGTAAGAGCCAGTCTTCTGTCC<br>CGGCAAAACCACAGGTGGGATGGGAATTGTTCTCCCTGAGTGATTG<br>GTAGCAGGGGACCGAGAGAG   |
| LM-PCR results of GFP insertion at <i>LMNA</i> loci by TE <sub>d</sub> system |          |           |           |                                                                                                                                                                                                                                                                             |
| Chr                                                                           | start    | gene      | frequency | Validation Seq                                                                                                                                                                                                                                                              |
| chr1                                                                          | 1.56E+08 | LMNA      | 534989    | CCGGTGAACAGCTCCTCGCCCTTGCTCACGGACGGGGTCTCCATGG<br>CCGGCAGGTTGGCAGCGCTGCCCGGGGCGAGGGTCCCGGAAAG<br>GGCGCGGGGCTCGGGTGAAGGACAGAGACTGCTCGGAGTCGGAG<br>TGCGCCGGCCGGCTGGCTCTCGGCTTGCTCCTGGCAGGCGTGGGG                                                                              |



|                                                                          |          |         |           | ATCTGGGCCGGGCGCTGTCCGACCTCGGGATCTGGGTTGGCTGGT<br>GTAGGTGCGGCGCTCCCGCAACA                                                                                                                                                                                                   |
|--------------------------------------------------------------------------|----------|---------|-----------|----------------------------------------------------------------------------------------------------------------------------------------------------------------------------------------------------------------------------------------------------------------------------|
| chr20                                                                    | 25483286 | NINL    | 3         | CCGGTGAACAGCTCCTCGCCCTTGCTCACGGACGGGGTCTCCATGG<br>CCGGCAGGTTTCAAATGGTTTAGCACCATCCCTCTTAGTACTGACCT<br>CATGATAGTGAGTGAATTCTCATGAGACCTGGTTGTTTAAAGTGTGT<br>CACACCTCCCCCTCGCTTTCTTGCTCCTGCTCTGGCCATGTGACCT<br>GCCTGCACCCCTTACCTTCTGCCATGATTGTAAGCTTCTGAGGCC<br>TCCCCAGAAGCAGCC |
| chr9                                                                     | 92748202 | MIR4290 | 3         | CCGGTGAACAGCTCCTCGCCCTTGCTCACGGACGGGGTCTCCATGG<br>CCGGCAGGTTGGCAACAGGATTGAGGGTGTCTACTGCAATGTCA<br>GTGCAACAAGAAATGGAGTCTGGCAGAGAAGGGAGACACACAATGG<br>CATCTTACCTAACTTGCCTGTACAGGCTTACCATGAGGGTTACG<br>GCTACTCGCTCCAACCAATAAGCAAATAACTTGGGTTGACTCCAG<br>TGCTGTGGAAAATCAA      |
| chr10                                                                    | 75584440 | NDST2   | 3         | CCGGTGAACAGCTCCTCGCCCTTGCTCACGGACGGGGTCTCCATGG<br>CCGGCAGGTTGGCAGCGCCAGTACCCCCCTGCTGACTCTCTAGT<br>TAGCCACCCTAGCAGAGGGACCTCCAAGACACACAGAACCCTGT<br>GAGGAGCCCAGAGAACTTAGCCAGCATGAGGCACTCCAGGAGCC<br>TGGAGACCTCAGACCATCCAGAGGTGGGGACCCAGCCCTCTTTC<br>CTGTTTCTGGCTTGGCAAAG     |
| chr14                                                                    | 20811578 | RAPP2   | 3         | CCGGTGAACAGCTCCTCGCCCTTGCTCACGGATACGGTGTCTCCAT<br>GGCGGATCCGAGTGGTCTCATACAGAACTTATAAGATTCCCAAATCC<br>AAAGACATTTACGTTTATGGTATTCCAGAACACATAGCGACATG<br>CAAATATTGCAGGGCGCCACTCCCCTGCTCCTCACAGCCATCTTCT<br>GCCAGGGCGCACGCGCTGGGTGTCCCGCTAGTGACACTGGG<br>CCCGCATTCCTTGGAGCG     |
| chr17                                                                    | 56991606 | PPM1E   | 3         | CCGGTGAACAGCTCCTCGCCCTTGCTCACGGACGGGGTCTCCATGG<br>CCGGCAGGTTGGCAGCGCTGCCGCGGGGCAGGGTCCCGGAAAG<br>GGCGCGGGGCTCGGGTGAAGGACAGATAGCCAACCAGCATTTGTT<br>CATTACTGTTAACTACATTCCAGACTTACCTTGTATTTCATCAGCTTTT<br>CCACTAATGTCCTTTTTCTGTTCTAGGATCCAATCCAGGATACTACAT<br>TGCATCACGTTTATT |
| chr12                                                                    | 5891999  | ANO2    | 2         | CCGGTGAACAGCTCCTCGCCCTTGCTCACGGACGGGGTCTCCATGG<br>CCGGCAGGTTGGCAGCGCTGCCGCGGGGCAGGGTCCCGGAAAG<br>GGCGCGATGGAAAATATCCACATTTAATGTTTTTAAACATCTTTTGA<br>GCCAAATCTTAAAATGTCTACTAGCAGAAATCTTCTTGGATCACA<br>GAATGCCACATCTGTGTATCTCCCTACTGCCAATCTACCCTTTAA<br>TGGGGTGCCAGAAC       |
| chr8                                                                     | 62045358 | CLVS1   | 2         | CCGGTGAACAGCTCCTCGCCCTTGCTCACGGACGGGGTCTCCATGG<br>CCGGCAGGTTGGCAGCGCTGCCGCGGGGCAGGGTCCCGGAAAG<br>GGCGCGGGGCTCGGGTGAAGGACAGAGACTGCTCGGAGTCCGGT<br>CAGGCATTGTGCCAGCAGCGACTGGGGAACCTCCCCACTTC<br>ATCACTGCAGTCACTGGGCCCTGCATCCCGCTTTTAGAACATC<br>TGAAGCTTCATCGGAAGCCT          |
| chr1                                                                     | 2.32E+08 | DISC2   | 2         | CCGGTGAACAGCTCCTCGCCCTTGCTCACGGACGGGGTCTCCATGG<br>CCGGCAGGTTGGCAGCGCTGCCGCGGGGCAGGGTCCCGGAAAG<br>GGCGCGGCAAAATGATTACAAATAATTTAGGTGTGCCTTGATACAA<br>ATCAGATCTGTATACCTTGTGTTTTCTGTTGACATCTGTCTTTGCAG<br>TCAGTGGCTTAAATTAATTTTTTGGTCTTAGGGAAATCATGTGAG<br>GGTTCCCTGTTGCCT     |
| chr7                                                                     | 1.26E+08 | MIR592  | 2         | CCGGTGAACAGCTCCTCGCCCTTGCTCACGGACGGGGTCTCCATGG<br>CCGGCAGGTTGGCAGCGCTGCCGCGGGGCAGGGTCCCGGAAAG<br>GCTAAAATATTTATAGTAAAATAGCAAATGAAATATTCAATAGTTCTA<br>CCTTTTAAAAGTTAATAAGAGGTGGGTTGTGTTGTTTTTGGTAAT<br>GAAATAATGTATATGTTTTTGAATTAACATTTCTGACATACTTTAGAA<br>CTTTGTTTTACTT    |
| <b>LM-PCR results of GFP insertion at <i>FBL</i> loci by CEed system</b> |          |         |           |                                                                                                                                                                                                                                                                            |
| Chr                                                                      | start    | gene    | frequency | Validation Seq                                                                                                                                                                                                                                                             |
| chr19                                                                    | 40325195 | FBL     | 319743    | GGCATGGACGAGCTGTACAAGCCCAAGGTGAAGAACTGAAGTTCAG<br>CGCTGTGACGATTGCGAGAGATGTGTGTTGATGACTGTTGCACGTGTG<br>TTTTCTATTAAGAACTCCGCTCCTCCATGCTGCTGCTCATTCC<br>TCCCCTTGACCTGTGACACAGGGAGCAGCACCCTTGGTCAATTTT<br>GCGGGGTTGGTAAATTTCACTCGGTACAGAGCGCATGCTCCGT<br>TTCTAGCTGCCTTTGC      |
| chr15                                                                    | 68132383 | SKOR1   | 3         | GGCATGGACGAGCTGTACAAGCCCAAGGTGAAGAACTGAAGTTCAG<br>CGCTGTGACGATTGCGAGAGATGTGTGTTGAGCGGTGTTTCGTCCTT<br>TCCACAAGATATATAAAGCCAAGAAATCGAAATACTTTCAAGTTACGG<br>TAAGCATATGATAGTCCATTTTAAACATAATTTTAAAACGCAAACTA                                                                   |

|                                                                         |          |         |           | CCCAAGAAATTATTACTTTCTACGTCAGGTATTTTGTACTAATATCTTT<br>GTGTTTACAGT                                                                                                                                                                                                              |
|-------------------------------------------------------------------------|----------|---------|-----------|-------------------------------------------------------------------------------------------------------------------------------------------------------------------------------------------------------------------------------------------------------------------------------|
| chr6                                                                    | 1.03E+08 | GRIK2   | 2         | GGCATGGACGAGCTGTACAAGCCCAAGGTGAAGAAGTGAAGTTCAG<br>CGCTGTCAGGATTGCGAGAGATGTGTGTTGATACTGTTGCACGTGTG<br>TTTTTCTATTAAGACTCATCCGCTCCTCCATCTACTAGAAATCATA<br>AGAAGTCAGTTCTGTTAGCACTGTTTGTCTCTATAGCTATCTCTCCAG<br>ATTTTGGTGCAGCTTTAGTGTAGGACTATGTGAAGTTTATTAATAATC<br>ACACTCAGAAAT   |
| chr4                                                                    | 54519321 | LNX1    | 2         | GGCATGGACGAGCTGTACAAGCCCAAGGTGAAGAAGTGAAGTTCAG<br>CGCATATAGGATTCTGTGGAGAATTAATAAAATAATGCAGGTCAGGT<br>AATTACTACAGAACCTGGTAGACGGTAAGCACTTAATAAATGTTAGCA<br>AAGATGCTGCAGCCACTGACGATGATGATGGTGTAGCTGAAGAA<br>TGAGCAGAAGAACTCCTTATTTAAACAATAATTCTATATCTTTAGAGTT<br>AAGAGTCTTAAA    |
| chr3                                                                    | 1.87E+08 | ADIPOQ  | 2         | GGCATGGACGAGCTGTACAAGCCCAAGGTGAAGAAGTGAAGTTCAG<br>CGCTGTCAGGATTGCGAGAGATGTGTGTTGATACTGTTGCACGTGTG<br>TTTTTCTATTAAGACTCATGGAACCCCTCTGCAAATCTTACATGGCA<br>GGTGGGTGACCAGAGGAGCCATTCCAATACCAGTCATTGCTGGATG<br>TTTCTGGGGTCTGTCCAGGTGCTGTGGAGCATATCTACTCTGTCT<br>AGTCTGTCTTTCCATT   |
| chr6                                                                    | 11700243 | ADTRP   | 2         | GGCATGGACGAGCTGTACAAGCCCAAGGTGAAGAAGTGAAGTTCAG<br>CGCTGTCAGGATTGCGAGAGATGTGTGTTGATACTGTTGCACGTGTG<br>TTTTTCTATTAAGACTCATCCGCTCCTCCATGCTGCTGCTCAGTGT<br>CTTACTTGTATAGATGCCCATAAATATTTGTTAGATGAGTGTCTGA<br>AAATCAAATTTCTAAAACACTGTTTTATCTTTTCAGAAGGTGGATTAAC<br>TATTTGCCTAAA    |
| chr1                                                                    | 36411242 | AGO3    | 1         | GGCATGGACGAGCTGTACAAGCCCAAGGTGAAGAAGTGAAGTTCAG<br>CGCTGTCAGGATTGCGAGAGATGTGTGTTGATAAAGCCTTGTCAACC<br>AGAGTATATTAGAATTATAAGTACAGCTGATAATGGCTAAAACCTAGT<br>TCTGCAAGATGACATCATTCTAACACTTCAACTTCTGTACCCCCAGA<br>TTTCTCTCTTCATTAATAAATAAACACAGAAAACCGTATGCCTCTGGA<br>AACTGTTCTGGA  |
| chrX                                                                    | 40267960 | ATP6AP2 | 1         | GGCATGGACGAGCTGTACAAGCCCAAGGTGAAGAAGTGAAGTTCAG<br>CGCTGACACTGACGAGTGCAGTGGACTGACTATTTCTTTCTTTCCAA<br>TTTTTGTGTTTCTTTTCTTTGTTTATTGCACCTGGCAAAGACCTCTA<br>GTACAATGCTGAATAGAAGTATGAGAATGGAGATCTTTGTCTTATTC<br>CTAATCTTAGAGTGAAGCAGTCTTTTATGATATAAGCTGTAGGTTTT<br>TTGGTAGATAC     |
| chr10                                                                   | 1.25E+08 | BUB3    | 1         | GGCATGGACGAGCTGTACAAGCCCAAGGTGAAGAAGTGAAGTTCAG<br>CGCTGTCAGGATTGCGAGAGACTGACGAGTGCAGTGGACTGAC<br>CCCAGGAGGTTAAAGCAGCAGCTTTAAACGTTCTGGAAGCTGAGG<br>CCAAGAATTGGCATGGTATCACTTTCCCTGCATTTTATTGGTTAAAGC<br>AGTTGCAGTCCAGTCCAGATTCAGAGGAGGGAAGTACACAAAG<br>GCCTGAATATGAGGAGG        |
| chr11                                                                   | 6264195  | CNGA4   | 1         | GGCATGGACGAGCTGTACAAGCCCAAGGTGAAGAAGTGAAGTTCAG<br>CGCTGTCAGGATTGCGAGAGATGTGTGTTGATACGCCTTATGCTGA<br>GGCAGTAGGAACTATTGAAGTATTTAAGCAGGGAGCTGTATGAT<br>ATCCTTTGCAGTTTAGAAAGATGTTGGTGGGAATGGGTGGGAGAT<br>AGGTGAGGCTGAATGCTGCAAAGTCTTAGAGCTAGAAGGACCTTGG<br>ACAAGGGAAAGGGAGCT      |
| <b>LM-PCR results of GFP insertion at <i>FBL</i> loci by TEd system</b> |          |         |           |                                                                                                                                                                                                                                                                               |
| Chr                                                                     | start    | gene    | frequency | Validation Seq                                                                                                                                                                                                                                                                |
| chr19                                                                   | 40325195 | FBL     | 374604    | GGCATGGACGAGCTGTACAAGCCCAAGGTGAAGAAGTGAAGTTCAG<br>CGCTGTCAGGATTGCGAGAGATGTGTGTTGATACTGTTGCACGTGTG<br>TTTTTCTATTAAGACTCATCCGCTCCTCCATGCTGCTGCTCATTCC<br>TCCCCTTGACCTGCTGACACAGGGAGCACGCACCCTTGGTCAATTTT<br>GCGGGGTTGGTAAATTTCTCACTCGGTACAGAGCGCATGCTCCGT<br>TTCTAGCTGCCTTTGA   |
| chr1                                                                    | 63842205 | ALG6    | 2         | GGCATGGACGAGCTGTACAAGCCCAAGGTGAAGAAGTGAAGTTCAT<br>GGATGGTACTCTAAAGAAAATGTATAGCTTAAATGATAGTGTACAGA<br>GACTGAACTTAAGAGCTAAAGCATCCAATTTAGTAAATTTAAAAAAG<br>AACAAACCCAAAGGATATCACTGAGAGAATGGGCAAAGCTCAGATTAG<br>TTATTTGAAAAATACGGCTATGTACCACAATAATGACATCTCAGTCAA<br>CAACGAAGTGTAT |
| chr7                                                                    | 6078400  | ANKRD61 | 2         | GGCATGGACGAGCTGTACAAGTCCAAGTGCAGTGCAGTGTAGTA<br>GGCCTCTAGGGAGTCAATTAACCTGTGTGGACTTCTCTTTGCAAGA<br>CAGAAGTGTCTCAGGACACAGGCCACCCAAAGGCCAAAGTCT<br>AATGAAAGTGACAGATAAGGAGACTGATAATTAACCCGGGTGTTGT                                                                                |

|       |          |          |   |                                                                                                                                                                                                                                                                               |
|-------|----------|----------|---|-------------------------------------------------------------------------------------------------------------------------------------------------------------------------------------------------------------------------------------------------------------------------------|
|       |          |          |   | AATACCAGCAGAAGGGGGCCAGGCTGAAGTCAGGCAGGGGTCCA<br>ATGGCAGAAGCTCTCAACT                                                                                                                                                                                                           |
| chr12 | 1.06E+08 | APPL2    | 2 | GGCATGGACGAGCTGTACAAGCCCAAGGTGAAGAAGTGAAGTTCAG<br>CGCTGTCAGGATTGCGAGAGATGTGTGTTGATACTGTTGCACGTGTG<br>TTTTCTATTTAAAAGACTCATCCGTCTCCCATGTCTGCTGCTCATTCC<br>TCCCTTGACCTGTGACACAGGGAGCACATGTAAGGAGTCATAG<br>GCTAAGGTCAACATTTCTGGAATGAGTGTCTGACAGGGGACGATGC<br>ACAGGACAGGAGTGTG    |
| chr4  | 94646574 | ATOH1    | 2 | GGCATGGACGAGCTGTACAAGCCCAAGGTGAAGAAGTGAAGTTCAG<br>CGCTGTCAGGATTGCGAGAGATGTGTGTTGATACTGTTGCACGTGTG<br>TTTTCTATTTAAAAGACTCATCCGTCTCCCATGTGGAACAGTGCCGCA<br>ATAAACATACATGTGCATGTGTCTTTATAGCAGCATGATTATAATCCT<br>TTGGGTATATACCCAGTAATGGGATGGCTGGGTCAAATGGTATTTCT<br>AGTTCTAGATCCT |
| chr15 | 51601395 | CYP19A1  | 2 | GGCATGGACGAGCTGTACAAGCCCAAGGTGAAGAAGTGAAGTTCAG<br>CGCTGTCAGGATTGCGAGAGATGTGTGTTGATACTGTTGCACGTGTG<br>TTTTCTATTTAAAAGACTCATCCGTCTCCCATGTCTGACACTGACGAG<br>TCGACTTGGACTGACCTCTTCTTACAGAGGCCAACATCCAATTCATGT<br>GGGCTCCACCCTCATGACCTAATCACCTCAAAGGTCCCACCACATA<br>ATACCATCACACTG |
| chr15 | 68132383 | SKOR1    | 2 | GGCATGGACGAGCTGTACAAGCCCAAGGTGAAGAAGTGAAGTTCAG<br>CGCTGTCAGGATTGCGAGAGATGTGTGTTGATACTGTTGCACGTGTG<br>TTTTCTATTTAAAAGACTCATCCGTCTCCCATGTCTGCCTAAAAGTGG<br>GGGGTGGCCTGTGAGAGCGGTGTTTCGTCTTCCACAAGATATATA<br>AAGCCAAGAAATCGAAATACCTTCAAGTTACGGTAAGCATATGATAGT<br>CCATTTTAAAACAT  |
| chr6  | 1.64E+08 | CAHM     | 1 | GGCATGGACGAGCTGTACAAGCCCAAGGTGAAGAAGTGAAGTTGAT<br>AAAATATACTTAAAAATTACCATATGACCATTTTAAAGTGTACAATTCA<br>TTGGCATTAACTACATATACAATGTTGTGTAACCATCACCAACGATTT<br>CCAGAACTTTGTCAATTATCCCAGCAGAAATCCTGAATACTTTAAACA<br>GGAAGTCCCAGCCCTCCCCTCCCACAACATGAACAAGATTGATTAG<br>GACTCTGTTCTT |
| chr17 | 32745159 | CCL1     | 1 | GGCATGGACGAGCTGTACAAGCCCAAGGTGAAGAAGTGAAGTTCAG<br>CGCTGTCACACTGACGAGTGCAGTGGACTGACTTTTCTTTGTTTTG<br>CCTGCTTGTAATTCTTTTTCCCTTTTTTACATAGTTGAGTTCATAC<br>TGACTGTACAATTCTCCATATCCTGATTTCACTCACACTATCATAAGT<br>GTTTTCCATGTTATTACACGTACTTCATAAATGCTGTTCTGAAGGCAA<br>CAAGCTCACT      |
| chr11 | 65074588 | CDC42EP2 | 1 | GGCATGGACGAGCTGTACAAGCCCAAGGTGAAGAAGTGAAGTTCAG<br>CGCTGTCAGGATTGCGAGAGATGACACTGACGAGTCGGATCACCTTT<br>TGTCGGATCTCACCAATGCGGTTGACTGTCAAGCACGCCTCGCTAAT<br>TTTTGTATTTTTAGTAGAGACGGGTTTTTACCATGTTCCCAGGCTGG<br>TCTCGAATCCTAACCTCAGCTGATCCACCCGCCTTGGCTCCCAA<br>GTGCTGGGATTACAG    |

The top 10 most frequent NGS read sequences showing the on-target and off-target sequences. Sequences in green are on-target; Sequences in red are off-target; Sequences in black are sequences derived from the donor template.
